# Supplementary material for: Crystallization of carboplatin-loaded onto microporous calcium phosphate using high-vacuum method: Characterization and release study
Source: PLoS One. 2020 Dec 8;15(12):e0242565. doi: 10.1371/journal.pone.0242565 (PMC7723252; doi:10.1371/journal.pone.0242565)
Supplement: S4 File — (XLSX) [file pone.0242565.s004.xlsx]

## Sheet: Plan1
Shift (cm-1)	HA50	HA60	HA70	TCP50	TCP60	TCP70	BCP50	BCP60	BCP70	TCP/MgO50	TCP/MgO60	TCP/MgO70	TCP/SiO2-50	TCP/SiO2-60	TCP/SiO2-70	DRUG
66	483.891	273.787	0	0	0	0	388.569	208.37	43.6601	0	0	223.023	0	0	0	724.77
66.5	494.784	295.989	14.0111	24.5113	33.7535	21.3875	401.736	220.592	53.0135	34.5634	46.8522	249.931	42.234	42.2236	42.3319	759.302
67	491.322	307.443	26.7763	48.1437	63.6755	42.4746	414.022	226.623	61.227	67.4816	90.5154	263.972	76.6034	87.2367	81.8851	771.086
67.5	474.237	307.787	36.9338	70.7453	88.6144	61.8416	424.491	225.287	67.6506	97.9514	129.889	264.431	101.952	133.827	116.145	755.511
68	444.662	296.942	43.7991	92.0991	108.374	79.2156	432.804	216.548	72.1668	125.834	165.066	250.73	119.884	180.894	144.794	712.372
68.5	407.975	277.606	48.0548	112.23	124.896	94.9259	439.012	202.559	74.9197	151.99	196.764	227.402	132.821	227.868	169.248	649.325
69	369.369	256.014	51.5515	131.804	140.313	110.048	444.022	186.527	77.0084	177.739	227.42	200.228	144.599	275.017	192.693	575.555
69.5	335.373	237.164	56.1354	151.688	156.588	126.02	449.29	171.815	79.6293	205.058	259.901	175.844	158.951	323.048	218.376	504.311
70	310.468	224.328	62.6509	173.113	174.683	143.307	456.326	160.433	83.6756	235.394	296.312	158.116	179.195	372.451	247.491	443.327
70.5	295.354	218.059	70.8361	196.052	195.097	161.649	465.48	153.488	89.1192	269.084	335.696	148.477	206.117	422.524	280.146	397.135
71	288.8	218.177	80.2839	219.764	217.958	180.27	475.877	150.903	95.5599	304.642	376.073	147.726	237.404	471.497	315.151	366.09
71.5	287.107	222.852	90.2701	243.021	242.93	198.608	486.406	151.563	102.555	339.859	415.072	153.499	269.522	517.612	351.462	346.463
72	287.858	229.615	100.628	264.785	270.016	216.591	496.188	154.326	109.69	373.052	451.267	163.806	299.58	559.447	388.355	335.675
72.5	289.557	237.557	111.813	284.615	299.06	234.792	505.173	158.158	117.264	403.217	484.499	176.989	326.12	597.502	425.947	330.147
73	292.551	246.788	124.584	302.678	330.092	254.159	514.461	162.742	126.111	431.248	515.867	191.376	349.764	633.161	464.926	328.935
73.5	297.994	257.846	139.322	320.15	363.344	275.366	526.006	168.203	136.923	458.647	546.9	206.364	373	668.272	505.961	333.289
74	306.333	271.363	156.363	337.549	398.962	298.456	540.754	174.551	149.986	486.594	577.558	221.792	398.02	702.929	549.378	344.008
74.5	316.59	286.851	175.486	354.397	436.647	323.247	558.867	181.556	165.258	514.492	606.173	237.305	424.612	735.83	595.005	360.669
75	326.865	302.381	196.117	369.518	475.778	349.183	578.859	188.489	181.759	540.55	630.739	252.407	450.495	764.212	642.072	382.312
75.5	334.714	314.611	217.611	381.356	514.593	375.568	598.673	194.341	198.217	561.668	649.269	266.493	471.76	785.507	688.958	405.121
76	338.546	321.074	238.86	388.079	551.496	401.849	615.919	198.489	213.419	576.068	659.611	279.13	484.827	797.082	734.175	426.009
76.5	338.519	320.172	259.246	389.421	585.003	427.653	629.133	200.422	226.921	582.267	664.67	289.91	487.537	799.712	776.411	442.698
77	336.54	310.744	277.943	386.648	614.253	452.551	638.738	200.444	238.833	581.794	666.696	298.851	480.867	796.428	814.755	454.521
77.5	334.688	294.832	294.394	381.022	639.169	475.788	645.361	199.11	249.332	578.165	668.219	306.441	469.199	789.949	848.388	462.136
78	334.511	274.846	308.005	374.363	659.515	496.48	649.878	197.033	258.8	573.896	671.303	313.149	456.443	783.245	876.588	465.539
78.5	336.609	254.259	317.401	367.773	676.102	513.2	652.639	194.994	266.93	571.268	677.126	319.824	446.314	778.215	898.909	465.689
79	340.199	235.695	322.563	362.154	688.982	524.587	652.764	193.286	272.828	571.378	686.63	326.954	440.793	776.619	915.052	462.611
79.5	344.076	220.561	323.376	358.15	697.062	530.309	649.532	192.193	275.814	574.922	699.167	334.81	440.692	779.054	924.978	455.398
80	347.571	210.008	319.759	356.334	700.387	530.496	642.998	191.869	275.108	581.818	714.743	343.546	446.081	785.536	929.202	444.456
80.5	350.558	203.609	312.783	357.424	699.125	525.53	633.326	192.546	270.581	591.447	733.688	353.074	455.603	796.466	928.562	430.487
81	353.622	201.239	303.694	361.59	693.731	516.993	622.315	194.804	263.178	603.902	755.206	363.494	468.585	811.523	925.008	414.823
81.5	357.287	202.515	293.783	368.95	686.825	506.58	611.259	198.477	254.062	618.719	778.484	374.969	484.668	829.705	920.657	399.91
82	361.244	206.101	284.044	378.793	680.069	496.055	601.262	203.118	244.909	634.564	801.646	387.275	502.562	849.27	916.847	387.176
82.5	364.287	211.129	274.49	389.528	674.664	486.506	591.94	207.959	236.583	649.782	822.213	400.105	520.918	867.193	913.559	377.216
83	364.574	216.656	264.44	399.177	670.406	478.111	581.885	211.972	229.211	662.114	838.252	412.985	537.601	880.991	909.808	369.234
83.5	360.996	221.671	253.127	406.463	666.667	470.852	569.349	214.354	222.349	670.549	848.297	425.424	551.346	888.959	904.132	362.286
84	352.944	225.583	240.269	410.94	662.39	464.249	553.685	214.327	215.375	674.629	853.439	437.012	561.632	891.13	895.682	355.604
84.5	341.534	228.395	226.315	412.943	657.387	458.11	535.216	212.546	207.965	675.398	854.905	447.963	568.386	888.842	884.855	348.975
85	328.97	230.96	213.037	413.53	652.408	452.742	515.366	210.058	200.31	674.683	855.486	458.81	573.141	884.481	873.927	343.682
85.5	318.371	234.128	202.048	414.117	648.919	448.53	496.801	208.057	193.228	674.515	858.324	470.29	577.417	881.489	865.547	341.44
86	311.973	238.95	194.63	415.908	647.98	445.942	481.936	207.562	187.562	677.036	865.465	482.906	583.468	882.188	861.931	343.416
86.5	310.595	245.756	190.84	419.269	650.389	445.33	472.337	209.132	183.899	682.934	877.601	496.792	592.405	888.082	864.794	350.207
87	314.406	254.87	190.055	424.178	656.825	446.555	467.607	213.21	182.181	692.681	893.661	512.102	604.961	898.695	873.819	361.99
87.5	322.216	266.519	191.373	430.454	666.598	449.489	467.195	219.439	182.359	705.866	912.701	528.702	621.559	913.005	888.449	377.834
88	332.997	279.932	193.703	437.91	678.916	454.261	470.37	227.339	184.183	721.977	933.203	546.467	641.539	929.938	906.879	396.495
88.5	346.092	294.873	196.793	446.553	693.434	460.453	476.147	236.682	187.219	740.804	954.01	565.421	664.14	947.955	927.405	416.941
89	360.675	310.767	200.907	456.699	709.632	467.927	484.027	246.951	191.522	761.458	974.651	585.09	688.216	966.217	948.832	438.289
89.5	375.983	326.922	206.061	468.004	726.847	476.345	493.488	257.703	196.956	782.636	994.766	604.815	711.854	984.146	969.94	459.682
90	390.849	342.21	212.096	479.799	744.031	484.858	503.502	268.141	203.094	802.737	1013.82	622.976	733.358	1001.31	989.591	479.9
90.5	403.512	354.986	218.019	490.995	759.358	492.545	512.982	277.135	209.264	820.03	1030.5	637.791	751.028	1016.89	1006.14	497.314
91	412.047	364.245	222.51	500.264	771.226	498.162	520.449	283.576	214.228	833.13	1043.3	647.473	763.755	1029.26	1017.95	509.731
91.5	413.818	369.195	224.447	506.503	778.395	501.431	524.711	286.691	217.134	840.467	1050.91	650.848	770.896	1037.34	1024.56	515.689
92	408.498	369.6	223.659	508.465	781.007	502.63	524.735	286.594	217.47	842.371	1052.64	649.007	772.142	1040.3	1026.09	515.349
92.5	397.512	366.169	220.842	507.194	779.658	502.325	521.137	283.535	215.514	840.076	1050.07	643.118	768.43	1038.37	1023.11	509.069
93	382.584	359.413	216.843	503.771	775.41	501.403	515.371	278.259	212.015	835.369	1044.99	634.702	761.476	1032.9	1017.01	497.974
93.5	366.255	350.101	212.615	499.22	769.845	500.264	508.562	271.784	207.601	830.051	1038.87	625.446	752.496	1025.21	1008.98	483.987
94	350.172	339.328	208.682	494.641	763.978	498.941	501.685	264.856	203.034	825.007	1032.93	616.252	742.721	1016.52	1000.37	468.321
94.5	335.419	327.639	205.007	490.509	758.19	497.064	495.169	257.768	198.573	820.417	1027.33	607.105	732.74	1007.67	992.174	451.997
95	321.801	315.57	201.217	486.996	752.457	494.375	489.033	250.502	194.206	815.819	1021.37	597.61	722.857	998.976	984.797	435.384
95.5	308.991	303.605	197.21	483.951	746.685	491.071	483.076	242.985	189.996	810.573	1014.51	587.443	713.383	990.713	978.559	418.728
96	296.934	292.32	193.212	481.384	741.039	487.703	477.429	235.332	186.135	804.497	1006.91	576.667	704.415	983.35	973.456	402.547
96.5	286.213	282.237	189.845	479.578	736.126	485.133	472.685	227.943	183.117	798.183	999.369	565.867	696.487	977.687	969.731	387.512
97	277.571	273.672	187.739	478.7	732.856	484.153	469.525	221.575	181.382	792.444	993.023	555.919	689.962	974.862	967.522	374.787
97.5	271.837	266.729	187.39	478.778	731.749	485.087	468.337	216.702	181.226	788.287	988.776	547.82	685.459	975.179	966.89	365.091
98	268.762	260.977	188.354	479.546	732.546	487.475	469.156	213.362	182.384	785.878	987.45	541.534	683.011	978.737	967.874	357.926
98.5	267.279	255.953	189.841	480.115	734.748	490.348	471.04	211.356	184.008	785.02	987.666	536.837	682.183	984.009	970.402	352.714
99	265.741	251.258	190.929	479.787	737.255	492.81	472.577	209.999	185.369	784.639	988.241	533.306	682.136	989.243	974.097	348.337
99.5	262.985	246.624	190.916	478.211	739.056	494.127	472.618	208.597	185.776	783.703	988.018	530.236	681.723	992.967	978.41	343.919
100	258.607	242.034	189.562	475.71	739.58	494.067	470.856	206.575	185.071	781.591	986.496	527.266	680.299	994.163	982.67	339.237
100.5	252.993	237.863	186.949	472.915	739.599	492.898	467.676	204.122	183.538	778.117	983.678	524.706	677.411	993.061	986.264	334.819
101	247.468	234.498	184.104	470.657	740.459	491.424	464.067	201.761	181.924	773.952	980.102	522.922	673.311	990.198	989.217	331.878
101.5	243.567	232.226	181.872	469.792	743.798	490.55	461.584	200.266	180.956	769.98	976.822	522.579	668.721	986.843	991.988	331.932
102	242.544	231.597	181.181	470.487	750.488	490.929	461.387	200.194	181.071	767.414	974.584	524.228	664.991	983.974	995.527	335.761
102.5	244.713	232.735	182.574	472.612	760.482	493.076	464.383	201.817	182.626	766.93	974.171	527.977	663.47	982.475	1000.91	343.643
103	250.543	236.014	186.3	475.719	773.405	497.047	470.438	205.495	185.618	769.188	975.911	534.115	665.251	983.103	1009.1	356.215
103.5	260.225	242.527	192.827	479.734	787.397	502.662	479.316	210.931	190.13	774.534	980.325	543	671.697	986.199	1020.78	373.74
104	273.743	252.354	201.776	484.722	801.392	509.719	490.923	217.966	196.462	782.751	988.163	554.515	682.997	992.248	1036	396.135
104.5	291.638	265.862	212.559	490.814	814.843	517.723	504.451	226.892	204.509	793.542	999.198	568.916	698.894	1001.36	1054.25	424.163
105	313.05	283.688	224.57	498.113	828.355	526.444	519.027	237.67	214.238	806.115	1012.72	586.422	718.979	1012.39	1074.75	457.626
105.5	336.394	304.728	236.776	506.138	842.591	535.676	533.322	250.139	225.145	818.987	1027.57	606.377	740.735	1023.71	1096.54	495.695
106	359.409	327.877	248.128	514.201	857.87	545.057	545.886	263.826	236.259	830.641	1041.89	628.076	761.91	1033.28	1118.04	536.999
106.5	379.415	351.161	257.282	521.118	873.588	554.204	555.367	277.339	246.352	839.793	1053.82	649.909	779.981	1039.41	1137.2	578.166
107	393.934	372.068	263.278	525.826	887.851	562.091	559.991	289.055	253.53	845.463	1061.09	669.66	793.17	1040.49	1151.72	615.188
107.5	400.324	388.813	266.004	527.58	898.473	568.009	559.489	297.223	257.096	846.971	1062.75	685.101	800.277	1036.24	1160.56	643.96
108	397.839	399.306	265.608	525.816	903.732	571.317	553.674	301.226	256.612	844.328	1058.48	694.827	799.909	1027.8	1163.36	662.493
108.5	388.349	403.64	262.924	521.274	903.011	571.695	543.408	300.98	252.495	838.44	1049.17	698.629	792.953	1017.26	1160.35	669.879
109	373.511	401.751	258.724	514.872	895.975	569.562	530.734	296.651	245.964	830.506	1037.07	696.096	781.337	1006.6	1153.09	665.589
109.5	356.15	393.396	253.564	507.662	884.433	565.389	517.007	289.601	238.064	821.871	1023.95	688.071	766.65	997.326	1143.1	651.732
110	338.414	380.829	247.768	500.516	870.453	559.758	503.453	281.195	230.074	813.706	1011.93	676.01	751.094	990.587	1131.58	630.226
110.5	322.28	365.766	241.359	494.015	855.825	553.461	490.962	272.42	222.71	807.067	1002.43	661.486	736.332	986.359	1119.23	604.015
111	308.699	349.649	234.183	488.388	841.84	546.999	480.019	263.876	216.123	802.457	996.493	646.351	723.856	984.303	1106.15	576.018
111.5	297.56	334.2	226.496	483.508	829.012	540.474	470.906	255.84	210.156	799.972	993.964	632.125	714.393	983.628	1092.27	548.237
112	288.943	320.475	218.579	479.181	817.716	534.146	463.294	248.513	204.491	799.625	994.018	620.275	707.829	983.779	1077.87	522.695
112.5	282.336	309.505	211.157	475.505	807.897	528.238	457.073	242.083	198.981	800.874	996.436	611.642	703.878	984.424	1063.68	500.639
113	277.721	301.329	204.836	472.761	799.611	523.255	452.177	236.951	193.801	803.42	1000.76	606.681	701.806	985.667	1050.92	483.197
113.5	275.184	295.696	200.153	471.301	792.885	519.371	448.203	233.409	189.255	806.99	1006.62	605.498	701.17	987.575	1040.63	470.756
114	274.628	292.248	197.022	471.905	787.492	516.593	444.944	231.413	185.839	811.31	1014.04	606.651	701.606	990.177	1033.03	462.042
114.5	275.781	290.302	194.909	474.569	783.401	514.735	442.049	230.848	183.691	816.152	1022.28	608.954	702.736	993.223	1028.01	456.241
115	277.85	289.8	193.423	478.735	780.525	513.328	439.272	231.365	182.696	821.106	1030.56	611.519	704.285	996.154	1024.72	452.283
115.5	279.902	290.528	192.018	483.472	778.468	512.043	436.376	232.369	182.654	825.757	1037.94	613.724	705.955	998.518	1022.33	449.185
116	281.197	292.191	190.401	487.783	776.938	510.579	433.265	233.157	182.97	829.775	1043.7	615.392	707.646	999.854	1020.15	446.366
116.5	281.087	294.255	188.339	490.925	775.452	509.039	429.951	233.229	183.114	832.826	1047.57	616.575	709.154	1000.2	1017.72	443.46
117	279.542	295.841	185.809	492.209	773.809	507.589	426.357	232.38	182.532	834.839	1049.39	617.592	710.364	999.829	1015.01	440.256
117.5	276.746	296.2	182.862	492.019	771.713	506.454	422.472	230.533	181.081	835.728	1049.78	618.474	711.22	999.371	1011.93	436.536
118	273.37	294.599	179.535	491.022	769.23	505.545	418.255	227.912	178.873	835.401	1049.77	618.988	711.648	999.51	1008.78	432.029
118.5	270.212	291.001	176.048	490.194	766.68	504.787	414.045	224.914	176.186	834.366	1050.12	619.003	711.87	1000.68	1005.78	426.73
119	267.92	285.951	172.752	490.129	764.674	504.083	410.341	222.086	173.513	833.172	1051.49	618.442	712.215	1003.27	1003.38	420.77
119.5	267.221	280.504	170.194	491.181	764.015	503.475	407.73	220.071	171.374	832.784	1054.2	617.611	713.412	1007.38	1002.26	414.711
120	268.374	276.028	169.049	493.575	765.05	503.281	407.027	219.199	170.443	833.922	1058.62	617.076	716.122	1013.19	1003.1	409.444
120.5	271.683	273.317	169.42	496.997	767.979	503.943	408.753	219.738	170.921	837.367	1064.7	617.363	720.788	1020.9	1006.15	405.744
121	277.171	272.868	171.376	501.189	772.625	505.817	412.975	221.445	172.652	843.533	1071.95	618.845	727.632	1030.07	1011.1	403.981
121.5	283.906	274.313	174.393	505.793	778.438	508.995	419.059	223.897	175.347	851.568	1079.76	621.266	735.755	1039.78	1017.34	403.844
122	291.164	276.991	177.796	510.427	784.784	513.18	425.674	226.645	178.348	859.872	1087.17	624.273	743.608	1048.67	1023.75	404.915
122.5	298.067	280.084	180.859	514.778	790.816	517.616	431.604	229.053	181.031	866.62	1093.45	627.293	749.568	1055.25	1029.09	406.304
123	304.037	282.827	182.898	518.446	795.699	521.424	435.586	230.859	182.702	870.818	1097.7	629.844	752.793	1058.26	1032.08	407.282
123.5	308.791	285.022	183.784	521.239	798.99	523.763	437.199	232.053	183.13	871.93	1099.76	631.877	753.325	1057.09	1032.57	407.656
124	312.563	286.905	183.745	522.981	800.51	524.537	436.659	233.034	182.63	870.441	1099.94	633.723	751.926	1052.95	1030.97	407.706
124.5	316.369	289.097	183.464	523.73	800.54	523.899	434.945	234.219	181.705	867.927	1099.16	635.9	750.541	1048.31	1028	408.23
125	321.376	292.295	183.621	524.04	799.573	522.568	433.759	236.114	181.066	866.191	1098.73	638.965	751.054	1046.11	1024.8	410.275
125.5	328.838	297.665	184.973	524.396	798.711	521.382	434.337	239.197	181.322	866.506	1099.65	643.668	754.568	1047.95	1022.42	414.723
126	339.57	305.905	188.045	525.353	799.152	521.234	437.902	243.752	183.042	868.974	1102.97	650.168	760.981	1054.33	1022.1	422.195
126.5	354.481	317.313	193.06	527.16	802.012	522.689	444.502	250.05	186.3	873.369	1108.58	658.854	769.523	1064.4	1024.28	433.505
127	374.071	332.365	200.032	529.995	807.399	525.598	453.835	257.919	190.957	879.015	1116.14	669.739	779.421	1075.49	1028.94	448.369
127.5	398.311	350.522	208.556	533.764	814.99	529.706	465.615	267.305	196.671	885.308	1124.77	682.531	789.631	1084.82	1035.8	466.383
128	426.699	371.533	218.452	538.066	824.194	534.354	478.839	278.3	203.087	891.963	1133.22	697.271	799.788	1090.18	1044.29	487.689
128.5	458.563	395.487	229.775	542.474	833.798	539.095	493.094	290.659	210.03	899.045	1140.87	713.934	810.027	1092.1	1053.72	511.769
129	493.334	421.903	242.463	546.668	842.804	543.31	508.498	304.246	217.498	906.561	1147.38	732.295	820.473	1091.24	1063.24	538.406
129.5	530.921	450.817	256.698	550.522	850.234	546.804	525.278	318.974	225.555	914.421	1153.25	752.489	831.058	1088.92	1072.16	567.694
130	571.366	482.447	272.696	553.863	856.156	549.461	543.748	334.63	234.462	922.154	1159.07	774.533	841.329	1086.48	1079.7	598.973
130.5	615.166	516.456	290.303	556.669	860.718	551.207	564.42	351.066	244.402	929.272	1165.54	797.821	850.764	1084.38	1085.51	631.599
131	663.096	552.892	309.428	558.96	864.192	552.143	587.241	368.374	255.415	935.089	1172.73	822.03	858.798	1082.53	1089.41	664.99
131.5	714.938	591.921	330.102	560.864	867.043	552.271	611.855	386.564	267.59	939.73	1180.27	846.515	865.25	1080.1	1091.59	698.502
132	770.157	632.914	352.114	562.478	869.618	551.758	638.112	405.725	280.832	943.808	1187.52	870.544	870.746	1077.06	1092.43	731.541
132.5	827.896	675.509	375.431	563.918	872.258	550.781	665.494	426.075	294.838	947.828	1193.97	893.23	876.005	1073.76	1092.61	763.54
133	886.674	718.81	400.056	565.26	874.975	549.627	693.889	447.219	309.339	952.407	1199.36	913.707	881.573	1070.8	1092.88	793.958
133.5	945.111	761.783	425.599	566.57	877.717	548.631	723.392	468.771	323.954	957.522	1203.96	931.698	887.786	1068.83	1093.64	822.159
134	1001.93	803.365	451.893	567.81	880.143	548.058	754.211	490.147	338.43	963.233	1208.56	946.6	894.337	1068.03	1094.97	846.933
134.5	1057.15	842.256	478.909	568.92	882.007	548.007	786.943	510.749	352.806	968.719	1213.83	958.022	900.44	1067.9	1096.42	867.172
135	1111.49	878.196	506.835	569.851	882.901	548.378	822.496	530.067	367.27	973.494	1219.86	965.791	905.043	1068.03	1097.47	881.246
135.5	1166.16	910.754	536.282	570.578	882.467	548.977	861.576	547.608	382.218	977.241	1226.16	968.866	907.522	1068.15	1097.49	887.367
136	1222.5	939.397	568.159	571.067	880.707	549.513	904.846	563.463	398.116	980.113	1231.88	966.637	907.38	1068.5	1096.18	884.859
136.5	1281.17	965.345	603.078	571.268	877.94	549.617	952.746	577.913	415.438	982.4	1235.83	958.995	904.703	1069.64	1093.64	873.383
137	1341.61	988.62	640.755	571.057	874.507	549.07	1004.08	590.993	433.784	984.165	1237.22	945.807	899.765	1072.1	1090.36	853.98
137.5	1401.03	1008.46	679.592	570.218	870.696	547.826	1056.51	602.621	452.36	985.415	1235.37	928.211	892.842	1075.97	1086.99	828.596
138	1454.57	1024.07	716.94	568.461	866.525	545.975	1105.44	612.089	469.817	985.56	1230.55	907.139	884.271	1080.23	1083.88	798.365
138.5	1494.83	1032.97	749.073	565.69	861.655	543.722	1146.13	618.166	484.56	983.727	1223.31	883.42	874.219	1083.65	1081.03	764.338
139	1516.51	1032.16	771.881	561.705	855.756	541.277	1173.74	619.395	494.329	979.322	1213.65	858.099	862.698	1085.1	1077.98	727.629
139.5	1514.44	1018.92	781.857	556.804	848.399	538.873	1183.8	614.101	497.307	972.012	1202	831.757	849.716	1083.85	1073.87	688.649
140	1483.24	991.634	775.625	551.237	839.649	536.575	1175.31	601.739	492.524	961.401	1188.66	804.803	835.503	1080.11	1068.18	648.205
140.5	1424.68	950.899	754.351	545.243	829.986	534.317	1147.69	582.896	479.584	948.305	1173.67	777.778	820.324	1074.69	1060.6	607.378
141	1342.41	898.932	720.88	539.284	820.11	531.998	1102.34	558.179	460.11	933.451	1157.92	751.146	804.817	1068.83	1051.28	567.326
141.5	1244.47	838.276	677.554	533.564	810.787	529.523	1045.86	529.109	436.031	917.981	1142.18	725.693	789.725	1063.58	1041.03	529.203
142	1140.65	773.318	629.049	528.513	802.501	526.932	983.333	497.67	409.154	902.929	1127.43	701.989	775.703	1059.38	1030.71	493.716
142.5	1038.41	708.333	579.478	524.181	795.566	524.292	919.933	465.779	381.868	889.028	1114.25	680.494	763.116	1056.44	1021.41	461.566
143	944.848	647.628	532.978	520.84	789.699	521.86	859.733	435.228	356.041	876.926	1103.04	661.924	752.285	1054.7	1013.8	433.02
143.5	863.303	593.225	491.94	518.635	784.623	519.88	806.074	407.03	333.258	866.813	1094.29	645.503	743.269	1054.11	1008.11	407.303
144	796.585	545.759	456.962	517.529	780.2	518.436	760.982	382.072	313.734	858.822	1087.74	630.776	735.922	1054.9	1004.31	384.263
144.5	745.032	505.941	428.818	517.213	776.585	517.589	725.007	360.652	297.557	853.26	1082.89	617.401	730.185	1056.91	1002.08	363.579
145	704.96	472.736	406.589	517.051	774.068	517.274	697.765	342.618	284.875	849.406	1079.46	604.905	725.553	1059.88	1001.25	344.924
145.5	674.29	445.244	389.338	516.526	773.112	517.517	677.824	327.956	275.179	846.752	1076.87	593.209	721.545	1063.23	1001.5	328.353
146	651.109	423.633	376.766	515.318	773.904	518.209	663.759	316.284	268.103	844.801	1074.63	582.545	717.71	1066.32	1002.71	313.529
146.5	632.75	406.69	368.002	513.405	775.795	519.327	654.721	306.776	263.344	842.956	1072.31	573.01	713.857	1068.57	1004.5	300.001
147	618.129	393.726	362.147	511.1	778.091	520.69	649.409	299.199	260.081	840.92	1069.63	564.72	709.969	1069.75	1006.43	287.386
147.5	607.437	384.687	358.961	508.987	779.886	521.949	646.989	293.21	257.687	838.652	1066.63	557.642	706.372	1070.54	1008.09	275.357
148	600.943	378.546	358.028	507.625	780.531	522.961	647.139	288.712	255.858	836.622	1063.85	551.52	703.693	1072.25	1009.21	263.848
148.5	599.752	374.623	358.997	507.163	779.794	523.491	649.42	285.906	254.523	835.41	1061.91	546.285	702.37	1076.81	1009.81	253.066
149	604.892	372.427	361.876	507.528	777.975	523.56	653.831	284.752	253.947	835.583	1061.41	541.784	702.725	1084.71	1010.05	243.138
149.5	615.846	371.49	366.48	508.591	775.797	523.276	660.897	285.114	254.659	837.253	1062.92	537.85	704.392	1096.15	1010.6	234.152
150	631.856	371.835	372.827	510.001	774.095	522.951	670.718	286.744	256.985	840.434	1066.1	534.426	706.885	1110.72	1012	226.074
150.5	651.213	374.08	381.083	511.685	773.418	522.885	683.442	289.19	260.99	844.798	1070.56	531.425	709.59	1125.89	1014.6	218.55
151	671.991	378.589	391.164	513.74	774.034	523.065	699.54	292.206	266.483	849.893	1075.49	528.771	712.003	1139.01	1018.45	211.373
151.5	692.849	385.669	403.112	516.23	775.942	523.491	718.117	295.763	272.964	855.253	1080.24	526.425	714.036	1146.98	1023.3	204.599
152	712.928	395.486	416.758	519.177	779.029	524.061	738.032	299.79	280.059	860.699	1084.63	524.479	716.012	1149.73	1028.74	198.408
152.5	732.048	406.81	431.307	522.39	783.108	524.79	757.755	304.305	287.366	865.997	1088.84	522.896	718.376	1147.54	1034.12	193.141
153	748.964	417.894	445.335	525.695	788.139	525.771	775.389	309.052	294.496	871.31	1093.14	521.748	721.318	1141.36	1038.78	189.251
153.5	761.717	426.148	456.411	528.752	793.682	527.308	789.033	313.371	300.813	876.522	1097.67	520.9	724.929	1134.2	1042.33	186.665
154	767.144	429.765	462.513	531.337	799.447	529.67	795.824	316.401	305.364	881.458	1102.18	520.119	728.714	1128.01	1044.64	184.855
154.5	760.239	427.199	461.816	533.467	805.073	532.766	794.192	316.93	307.337	885.652	1106.01	519.181	732.24	1124.94	1045.99	183.203
155	739.493	417.278	452.807	535.278	810.162	536.367	783.43	314.352	305.578	888.764	1108.51	517.869	735.083	1124.7	1046.82	181.061
155.5	705.238	400.887	436.219	537.09	814.537	540.099	763.187	308.31	299.383	890.833	1109.25	516.14	737.47	1126.76	1047.91	178.103
156	659.205	378.979	413.21	539.062	818.1	543.524	735.739	298.57	289.172	891.733	1108.65	514.043	739.835	1130.47	1050.17	174.328
156.5	606.102	353.396	385.843	541.526	821.415	546.369	703.195	286.28	275.374	891.92	1107.36	511.884	742.628	1134.76	1054.3	170.228
157	550.888	326.823	357.517	544.576	824.91	548.54	668.199	272.834	259.686	891.766	1106.6	509.941	746.413	1139.64	1060.53	166.557
157.5	498.619	300.98	330.634	548.264	829.041	550.444	633.773	259.436	244.008	892.062	1107.48	508.57	751.245	1145.14	1068.36	163.903
158	452.973	277.314	306.806	552.594	833.892	552.455	602.617	247.141	229.705	893.233	1110.82	507.939	757.256	1151.68	1077.24	162.416
158.5	414.667	256.641	286.471	557.468	839.503	554.985	576.585	236.617	217.696	895.763	1116.68	508.068	764.158	1159.48	1086.54	161.972
159	384.2	239.462	269.826	562.913	845.861	558.262	555.633	228.299	208.036	899.867	1124.35	508.954	772.046	1168.46	1095.74	162.31
159.5	360.304	226.139	256.649	568.768	852.837	562.418	539.735	222.09	200.867	905.48	1133.31	510.456	781.38	1178.42	1104.8	163.118
160	342.144	216.286	246.501	575.154	860.69	567.588	528.767	217.689	195.868	912.439	1142.67	512.504	792.536	1189.25	1114.09	164.345
160.5	329.491	209.386	239.232	582.085	869.829	573.61	522.031	214.784	192.727	920.477	1151.87	515.042	805.903	1200.88	1124.25	166.177
161	321.227	204.984	234.605	589.725	880.667	580.302	519.136	213.003	191.39	929.114	1160.6	517.964	821.562	1213.52	1135.82	168.771
161.5	316.539	202.364	232.158	597.893	893.266	587.543	520.105	212.293	191.652	937.857	1168.79	521.294	839.187	1227.47	1149.26	172.199
162	314.404	201.16	231.623	606.171	907.523	595.064	523.845	212.63	193.252	946.295	1176.87	525.036	857.842	1242.7	1164.36	176.247
162.5	313.82	201.081	232.381	614.431	922.888	602.736	529.632	213.973	195.981	954.409	1185.13	529.115	876.662	1259.07	1181.03	180.358
163	314.376	202.012	233.767	622.328	938.649	610.445	536.672	216.285	199.422	962.411	1194.01	533.506	894.918	1276.21	1198.82	183.877
163.5	316.114	204.031	235.29	629.932	954.109	618.139	544.098	219.366	203.072	970.64	1203.51	538.303	912.386	1293.61	1217.2	186.132
164	319.313	207.013	236.763	637.511	968.842	625.864	551.521	222.941	206.606	979.591	1213.62	543.576	929.074	1310.89	1235.6	187.248
164.5	324.447	210.725	238.332	645.662	982.95	633.655	558.791	226.857	209.986	989.51	1224.1	549.511	945.25	1327.96	1253.86	187.655
165	331.756	214.946	240.387	654.96	996.658	641.578	566.307	231.065	213.336	1000.75	1234.71	556.365	961.195	1344.78	1272.12	188.068
165.5	340.421	219.249	243.158	665.52	1010.26	649.579	574.384	235.602	216.872	1012.75	1245.63	564.068	977.195	1361.55	1290.46	189.161
166	349.674	223.35	246.76	676.95	1023.96	657.616	583.326	240.674	220.703	1025.19	1257.19	572.574	993.549	1378.37	1309.24	191.478
166.5	358.744	227.173	251.185	688.611	1037.8	665.557	593.098	246.477	224.933	1037.83	1270.01	581.53	1010.47	1395.3	1328.63	195.171
167	367.157	231.005	256.135	699.814	1051.72	673.25	603.542	252.912	229.549	1050.58	1284.88	590.535	1028.1	1412.09	1348.49	199.907
167.5	374.9	235.262	261.174	710.003	1065.48	680.55	614.251	259.759	234.297	1063.62	1301.95	599.298	1046.3	1428.25	1367.94	205.198
168	382.419	240.3	265.893	719.067	1078.93	687.364	624.71	266.594	238.916	1077.27	1320.83	607.799	1064.8	1443.35	1386.07	210.721
168.5	390.509	246.274	270.259	727.141	1091.91	693.65	634.571	273.07	243.226	1091.74	1340.53	616.261	1082.9	1456.87	1402	216.343
169	399.607	253.061	274.234	734.83	1104.21	699.427	643.597	278.893	247.171	1106.86	1359.78	624.938	1099.71	1468.48	1415.16	222.249
169.5	409.71	260.469	277.904	742.262	1115.63	704.975	651.847	284.067	250.66	1122.04	1377.69	634.191	1114.47	1478.12	1425.6	228.572
170	420.367	268.099	281.371	749.154	1125.89	710.575	659.255	288.798	253.69	1136.45	1393.49	643.942	1126.87	1485.8	1433.55	235.54
170.5	430.995	275.641	284.839	755.238	1134.72	716.556	665.996	293.382	256.309	1149.26	1407.31	653.956	1137.04	1491.49	1439.84	243.406
171	441.023	283.045	288.525	760.027	1142.1	722.95	672.189	298.068	258.728	1159.72	1419.54	663.845	1144.96	1495.42	1444.94	252.01
171.5	450.131	290.373	292.588	763.184	1148.02	729.546	677.69	302.848	261.026	1167.76	1430.33	673.353	1150.94	1497.36	1448.61	261.244
172	458.569	297.821	297.231	764.916	1152.36	735.847	682.42	307.601	263.347	1173.37	1440.05	682.312	1154.99	1497.36	1450.44	271.078
172.5	467.159	305.688	302.726	765.869	1155.12	741.205	686.323	312.116	265.83	1177.15	1448.53	690.86	1156.56	1495.5	1449.96	281.555
173	476.697	314.237	309.043	766.549	1156.26	745.015	689.424	316.311	268.556	1180.01	1455.17	699.184	1155.61	1491.93	1447.12	292.629
173.5	487.98	323.806	316	767.066	1155.53	747.164	691.969	320.175	271.524	1182.45	1459.76	707.415	1152.17	1486.86	1442.43	304.432
174	501.402	334.859	323.189	767.189	1153.11	747.892	694.361	324.02	274.607	1184.72	1462.04	715.622	1146.51	1480.81	1437.11	316.82
174.5	516.841	347.357	330.149	766.269	1149.37	747.663	697.194	328.096	277.68	1186.92	1461.83	723.514	1139.62	1474.09	1432.22	329.673
175	533.932	361.267	336.582	763.644	1144.52	746.976	700.863	332.685	280.611	1188.89	1459.84	730.925	1132.51	1466.92	1428.19	342.959
175.5	552.041	376.551	342.323	758.87	1139.09	745.857	705.503	337.831	283.389	1190.34	1456.76	737.838	1126.24	1459.58	1424.68	356.711
176	570.65	392.763	347.757	752.296	1133.39	743.792	710.71	343.516	286.004	1190.86	1453.33	744.428	1121.17	1451.79	1420.78	371.044
176.5	589.546	409.619	353.243	744.859	1127.51	740.18	715.794	349.824	288.587	1190.31	1450.05	750.93	1117.04	1443.4	1415.6	386.249
177	608.845	426.944	359.243	737.448	1121.49	734.5	720.094	356.729	291.229	1188.52	1447.12	757.879	1113.49	1434.43	1408.6	402.612
177.5	628.613	444.626	365.816	730.802	1115.29	726.171	722.885	364.355	294.065	1185.67	1444.34	765.672	1109.99	1424.95	1400.26	420.328
178	648.881	462.679	372.781	725.243	1108.98	716.176	724.155	372.824	296.997	1181.75	1441.32	774.631	1106.35	1415.25	1391.67	439.511
178.5	669.202	481.238	379.755	720.558	1102.68	705.821	724.044	382.038	299.805	1177.04	1437.52	784.826	1102.68	1405.57	1383.8	459.953
179	688.85	500.05	386.296	716.284	1096.64	696.401	722.908	391.717	302.269	1171.91	1432.37	795.984	1099.28	1396.25	1377.08	481.616
179.5	706.933	518.889	392.138	711.928	1091.1	688.799	721.245	401.425	304.159	1166.72	1426.22	807.998	1096.36	1387.26	1371.2	504.565
180	722.923	537.495	397.062	707.446	1086.24	683.241	719.227	410.702	305.279	1161.74	1419.4	820.523	1093.79	1378.35	1365.48	528.739
180.5	736.634	555.567	401.163	703.141	1082.15	679.686	716.649	419.057	305.437	1156.97	1412.89	833.345	1091.48	1369.29	1359.07	554.292
181	747.988	573.075	404.206	699.478	1078.91	677.015	713.17	426.415	304.756	1152.4	1407.31	846.263	1089.21	1359.9	1351.73	581.551
181.5	757.451	590.281	406.061	696.942	1076.52	674.24	708.369	433.062	303.338	1147.78	1403.22	859.501	1087.05	1350.34	1344.2	610.507
182	765.501	607.376	406.683	695.614	1075.01	670.996	701.715	439.4	301.45	1142.85	1400.75	873.246	1085.36	1340.79	1337.4	641.236
182.5	772.526	624.611	405.971	695.252	1074.54	667.268	693.24	445.752	299.339	1137.26	1399.12	888.006	1084.72	1331.89	1332.31	673.938
183	779.179	642.128	404.189	695.194	1074.85	663.487	683.347	452.299	297.142	1131.08	1397.62	904.073	1085.81	1324.03	1329.16	708.468
183.5	785.888	659.834	401.876	694.863	1075.82	660.116	672.673	459.032	295.034	1124.54	1395.57	921.577	1088.48	1317.53	1327.83	744.71
184	793.355	677.808	399.695	693.927	1077.09	657.543	662.069	465.773	293.088	1118.04	1392.94	940.812	1092.46	1312.3	1327.54	782.514
184.5	802.045	696.273	398.291	692.361	1078.16	655.859	652.224	472.373	291.473	1112.03	1389.96	961.467	1097.28	1307.99	1327.44	821.28
185	812.348	715.602	397.911	690.486	1078.88	654.742	643.666	478.859	290.367	1106.91	1387.3	983.242	1102.13	1304.12	1327.1	860.514
185.5	824.902	735.957	398.511	688.697	1079.19	653.711	636.555	485.501	289.879	1103.07	1385.53	1005.71	1106.58	1300.12	1326.45	899.564
186	839.378	757.373	399.777	687.504	1079.33	652.471	630.712	492.633	290.187	1100.48	1384.97	1028.32	1110.32	1295.6	1325.64	938.083
186.5	855.217	779.376	401.396	687.016	1079.43	650.967	625.851	500.57	291.218	1098.92	1385.19	1050.56	1113.48	1290.56	1324.67	975.787
187	871.502	801.329	403.222	687.104	1079.81	649.295	621.637	509.399	292.759	1097.87	1385.53	1071.7	1116.17	1285.1	1323.5	1012.5
187.5	887.499	822.164	405.343	687.501	1080.43	647.708	618.149	518.884	294.534	1096.74	1385.22	1091.22	1118.44	1279.42	1321.91	1048.12
188	902.479	841.125	407.904	687.736	1081.26	646.488	615.63	528.46	296.109	1095.02	1383.82	1108.47	1120.41	1273.72	1319.65	1081.94
188.5	915.631	857.929	411.096	687.426	1081.94	645.873	614.183	537.368	297.216	1092.16	1381.26	1122.81	1122	1267.95	1316.83	1113.3
189	926.862	872.703	414.668	686.157	1082.16	645.643	613.968	545.03	297.775	1087.93	1377.64	1134.52	1123.14	1261.96	1313.72	1141.54
189.5	935.982	885.968	418.286	683.818	1081.55	645.502	614.618	550.924	298.024	1082.31	1373.54	1143.52	1123.72	1255.39	1310.46	1165.56
190	943.096	897.537	421.543	680.494	1079.72	645.041	615.347	554.889	298.138	1075.51	1369.26	1149.44	1123.39	1248.15	1307	1184.45
190.5	948.483	907.266	423.983	676.394	1076.64	643.982	615.293	557.105	298.259	1068.08	1364.63	1152.48	1121.7	1240.34	1302.98	1198.08
191	952.126	914.611	425.507	671.88	1072.1	642.144	613.988	557.512	298.396	1060.57	1359.09	1152.39	1118.04	1232.16	1297.86	1205.59
191.5	953.656	917.984	425.982	667.196	1066.37	639.609	611.52	556.335	298.298	1053.34	1352.11	1148.29	1111.79	1223.99	1291.21	1206.86
192	952.805	916.991	425.75	662.572	1059.88	636.777	608.197	553.771	297.535	1046.59	1342.81	1140.55	1102.7	1216.1	1283.05	1202.44
192.5	948.975	911.642	425.078	658.007	1052.83	634.002	604.712	549.623	295.828	1040.23	1331.2	1129.43	1091.03	1208.61	1273.93	1192.22
193	941.191	901.706	424.049	653.452	1045.28	631.534	601.68	543.675	293.185	1034.03	1317.69	1115.11	1077.23	1201.46	1264.41	1176.81
193.5	929.883	888.204	422.601	648.756	1037.13	629.256	599.391	535.864	289.682	1027.46	1303.21	1098.54	1062.22	1194.32	1254.9	1156.87
194	915.555	872.124	420.661	643.946	1028.07	626.866	597.576	526.082	285.677	1020.28	1288.89	1080.15	1046.83	1186.85	1245.31	1132.33
194.5	899.063	854.015	418.078	639.03	1017.88	623.899	595.783	514.577	281.515	1012.44	1275.3	1060.16	1031.17	1178.92	1235.25	1103.98
195	881.639	834.738	414.885	634.071	1006.67	619.774	593.766	501.895	277.498	1004.28	1262.79	1039.09	1014.93	1170.57	1224.06	1072.48
195.5	864.247	814.812	411.364	629.181	994.79	614.374	591.353	488.615	273.822	996.103	1250.95	1017.14	997.521	1162	1211.29	1038.19
196	847.591	794.467	407.959	624.35	982.916	607.963	588.689	475.353	270.475	988.082	1239.27	994.346	978.536	1153.63	1197.32	1002.14
196.5	831.795	774.012	405.167	619.449	971.443	601.324	586.093	462.387	267.481	980.515	1227.09	971.031	957.878	1145.95	1182.68	965.047
197	816.691	753.701	403.245	614.231	960.773	595.103	583.992	449.886	264.793	973.075	1214.31	947.273	936.046	1139.3	1168.44	927.561
197.5	802.193	733.853	402.472	608.42	950.72	589.833	582.703	437.888	262.423	965.428	1201.25	923.265	913.928	1133.7	1155.32	890.25
198	788.57	714.675	402.723	601.856	941.003	585.801	582.585	426.39	260.497	956.978	1188.46	899.104	892.562	1129.16	1143.86	853.597
198.5	776.504	696.453	403.945	594.51	931.182	582.748	583.985	415.684	259.1	947.814	1176.53	874.979	872.472	1125.44	1134.11	817.91
199	767.061	679.496	406.242	586.689	921.141	580.243	587.245	405.972	258.486	938.251	1165.88	851.36	853.981	1122.09	1125.61	783.525
199.5	761.11	663.871	409.6	578.854	910.979	577.571	593.09	397.469	258.857	928.831	1156.98	828.709	837.076	1118.84	1117.83	750.207
200	759.675	649.709	414.194	571.462	900.945	574.392	601.483	390.508	260.194	920.303	1149.66	807.48	821.617	1115.35	1110.22	718.018
200.5	762.882	637.422	420.367	565.176	891.374	570.619	612.381	384.908	262.553	913.158	1143.77	787.866	807.721	1111.54	1102.57	686.929
201	769.647	626.839	427.988	560.22	882.482	566.571	625.139	380.473	265.755	907.547	1139.17	769.726	795.058	1107.36	1094.81	656.928
201.5	778.864	618.016	436.868	556.601	874.609	562.681	638.67	376.975	269.474	902.954	1135.38	752.88	783.211	1102.98	1087.09	628.18
202	789.194	611.067	446.562	553.764	867.589	559.409	652.107	374.064	273.454	898.798	1132.08	736.814	771.731	1098.7	1079.55	600.521
202.5	799.382	605.425	456.385	551.164	861.434	557.197	664.75	371.544	277.306	894.578	1128.77	721.141	760.097	1094.49	1072.49	574.071
203	808.253	600.511	465.717	548.186	856.142	556.105	676.357	369.314	280.885	890.148	1125.05	705.756	748.022	1090.38	1066.17	548.795
203.5	815.052	595.692	474.039	544.461	851.77	555.881	686.944	367.329	284.126	885.615	1120.58	690.882	735.635	1086.23	1060.72	524.679
204	819.021	590.162	481.204	539.886	848.276	556.036	696.499	365.372	286.989	881.364	1115.34	676.78	723.48	1082.01	1056.34	501.868
204.5	819.634	583.19	486.878	534.688	845.635	556.145	704.888	363.182	289.436	877.707	1109.88	663.813	712.492	1077.57	1052.92	480.636
205	816.782	574.221	490.764	529.539	843.731	555.895	711.729	360.392	291.22	874.889	1104.74	652.129	703.352	1072.96	1050.52	461.042
205.5	810.435	563.111	492.649	524.907	842.373	555.178	715.989	356.681	292.102	872.805	1100.44	641.62	696.057	1068.51	1049.04	443.149
206	800.25	550.083	492.072	521.214	841.418	554.164	717.172	351.785	291.821	871.312	1097.09	632.437	690.137	1064.39	1048.17	426.956
206.5	786.52	535.954	488.7	518.576	840.43	553.23	714.684	345.914	289.926	870.186	1094.63	624.383	684.88	1060.83	1047.68	412.052
207	769.402	521.593	483.083	517.041	839.462	552.865	708.14	339.36	286.5	869.258	1092.75	617.348	679.696	1058.1	1047.35	398.143
207.5	748.569	507.489	475.48	516.573	838.607	553.299	697.972	332.386	281.798	868.492	1091.06	611.452	674.248	1056.35	1047.26	385.159
208	724.835	493.788	466.488	517.193	838.121	554.595	684.837	325.237	275.939	867.771	1089.57	606.492	668.95	1055.74	1047.29	373.048
208.5	699.037	480.099	456.608	518.654	838.259	556.666	669.624	317.931	269.321	867.066	1088.55	602.327	664.414	1056.37	1047.58	362.044
209	672.147	465.821	446.049	520.729	839.29	559.122	653.326	310.389	262.278	866.412	1088.39	598.587	661.39	1058.32	1048.38	352.35
209.5	645.353	450.378	435.003	523.196	841.451	561.672	636.401	302.467	255.115	865.982	1089.49	594.963	660.236	1061.49	1049.98	343.992
210	619.645	433.764	423.504	525.651	844.437	564.119	619.236	294.099	248.094	865.964	1091.72	591.16	660.721	1065.63	1052.56	337.017
210.5	596.095	416.572	411.784	527.774	847.893	566.434	602.33	285.384	241.456	866.59	1094.53	587.187	662.413	1070.17	1055.92	331.095
211	574.651	399.791	400.171	529.346	851.239	568.79	585.951	276.577	235.401	867.806	1096.97	583.232	664.706	1074.54	1059.99	325.879
211.5	555.109	384.298	389.175	530.434	854.363	571.297	570.733	268.03	229.912	869.511	1098.34	579.529	667.099	1078.35	1064.53	321.189
212	536.858	370.857	379.374	531.305	857.232	574.169	556.987	260.093	225.006	871.498	1098.48	576.412	669.235	1081.63	1069.23	316.848
212.5	519.563	359.522	371.096	532.347	860.148	577.477	545.182	253.013	220.666	873.485	1097.79	573.942	671.141	1084.83	1073.81	312.787
213	503.374	349.87	364.452	533.682	863.515	581.25	535.526	247.049	216.876	875.55	1097.22	572.224	672.906	1088.55	1078.13	309.018
213.5	489.004	341.347	359.771	535.369	867.796	585.357	527.924	242.325	213.636	878.057	1097.9	571.255	674.755	1093.18	1082.26	305.584
214	477.168	333.283	356.816	537.355	873.063	589.791	522.424	238.688	211.153	881.367	1101.04	570.963	676.8	1098.73	1086.36	302.452
214.5	468.512	325.53	355.337	539.531	879.163	594.57	518.863	236.111	209.488	885.672	1106.77	571.377	679.242	1104.74	1090.63	299.603
215	463.767	318.404	355.29	541.868	885.885	599.664	517.075	234.416	208.753	890.919	1114.61	572.499	682.134	1110.3	1095.37	297.177
215.5	461.773	312.318	356.425	544.403	892.964	604.952	517.098	233.388	209.1	896.527	1123.45	574.178	685.587	1114.65	1100.82	295.201
216	461.633	307.681	358.424	547.352	900.311	610.26	518.696	232.911	210.441	901.827	1132.01	576.231	689.506	1117.68	1107.22	293.926
216.5	462.459	304.956	361.078	550.702	907.805	615.422	521.674	232.769	212.76	906.373	1139.45	578.306	693.801	1120.06	1114.56	293.363
217	463.81	303.995	364.209	554.308	915.385	620.298	526.067	232.872	215.93	910.319	1145.33	579.994	698.234	1122.77	1122.86	293.567
217.5	465.66	304.353	367.805	557.914	922.82	624.836	531.737	233.283	219.721	914.082	1150.16	580.847	702.578	1126.89	1132.03	294.54
218	468.495	305.488	372.096	561.237	929.877	629.099	538.656	234.089	223.843	918.213	1154.67	581.061	706.626	1133.03	1141.74	295.895
218.5	472.848	306.908	377.178	564.182	936.384	633.451	546.935	235.41	228.046	923.013	1159.77	580.914	710.253	1141.17	1151.92	297.386
219	479.078	308.345	383.148	566.685	942.519	638.072	556.575	237.386	232.136	928.377	1165.84	580.914	713.501	1150.17	1162.1	298.744
219.5	486.956	309.791	389.926	569.073	948.526	643.091	567.306	239.961	236.028	933.779	1172.58	581.478	716.354	1158.59	1172.11	299.903
220	495.779	311.41	397.231	571.648	954.767	648.356	578.743	242.963	239.746	938.655	1179.31	582.892	719.233	1165.41	1181.63	300.835
220.5	505.006	313.548	404.648	574.596	961.6	653.6	590.234	246.102	243.428	942.859	1185.17	585.239	722.294	1170.31	1190.48	301.643
221	513.995	316.555	411.765	577.88	968.907	658.568	601.144	249.069	247.199	946.72	1189.65	588.013	725.945	1173.61	1198.54	302.479
221.5	522.356	320.327	418.254	581.274	976.267	662.932	610.749	251.694	251.212	950.806	1192.42	590.721	730.04	1176.13	1205.82	303.441
222	529.783	324.571	423.962	584.451	982.842	666.832	618.745	253.912	255.367	955.67	1194.26	592.827	734.455	1178.83	1212.73	304.526
222.5	536.001	328.877	428.65	587.072	988.26	670.394	625.027	255.928	259.476	961.455	1196.13	594.318	738.89	1182.12	1219.41	305.684
223	540.758	332.671	432.158	588.869	992.274	673.773	629.531	257.882	263.3	967.535	1199.13	595.174	742.841	1185.65	1226.01	306.824
223.5	543.957	335.591	434.326	589.854	994.907	677.087	632.904	259.911	266.63	972.973	1203.46	595.667	746.133	1188.57	1232.32	307.925
224	545.643	337.512	435.017	590.079	996.693	680.231	635.554	261.96	269.332	976.908	1208.87	596.175	748.641	1190.29	1238.1	309.015
224.5	546.17	338.622	434.534	589.686	998.18	682.983	637.832	263.855	271.23	979.204	1214.63	596.931	750.993	1190.84	1242.94	310.18
225	545.827	339.349	433.22	588.98	999.952	685.072	639.969	265.306	272.456	980.086	1219.73	598.078	753.591	1190.81	1246.48	311.534
225.5	545.051	340.08	431.549	588.169	1002.09	686.378	641.997	266.176	273.086	980.377	1223.45	599.549	757.013	1191.32	1248.8	313.089
226	544.131	341.111	429.912	587.605	1004.59	686.911	643.717	266.555	273.28	981.086	1225.39	601.279	761.325	1193.65	1250.12	314.93
226.5	543.254	342.607	428.551	587.572	1007.32	686.887	644.794	266.671	273.17	982.904	1226.32	603.212	766.443	1198.36	1250.89	317.157
227	542.596	344.744	427.603	588.41	1010.13	686.481	644.896	266.959	272.805	986.073	1227.21	605.54	772.019	1204.84	1251.59	319.926
227.5	542.464	347.673	427.048	590.122	1012.91	685.8	643.803	267.725	272.224	990.119	1228.92	608.436	777.489	1211.56	1252.54	323.463
228	543.5	351.637	426.99	592.56	1015.65	684.92	641.827	269.298	271.499	994.539	1231.84	612.422	782.621	1217.15	1254.07	328.14
228.5	546.369	356.996	427.792	595.512	1018.42	683.888	639.529	271.574	270.715	998.905	1236.06	617.904	787.244	1220.63	1256.28	334.163
229	551.558	363.556	429.644	598.648	1021.25	682.866	637.714	274.399	270.176	1002.96	1241.15	625.072	791.572	1221.86	1259.18	341.61
229.5	559.357	371.166	432.635	601.752	1024.19	682.106	637.118	277.636	270.13	1006.95	1246.47	634.004	795.688	1221.63	1262.8	350.408
230	569.137	379.657	436.535	604.651	1027.19	681.898	638.199	281.221	270.947	1011.06	1251.51	644.133	799.732	1221.09	1266.99	360.33
230.5	579.781	388.597	440.931	607.428	1030.26	682.62	641.159	285.224	272.866	1015.58	1256.24	654.91	803.786	1221.57	1271.7	371.365
231	590.177	397.987	445.465	610.236	1033.4	684.295	645.208	289.808	275.777	1020.69	1260.86	665.574	808.119	1223.32	1276.63	383.531
231.5	599.624	407.891	449.783	613.144	1036.71	686.895	649.573	294.982	279.53	1026.29	1265.66	675.704	813.048	1226.13	1281.84	396.849
232	608.023	418.339	453.795	616.134	1040.47	690.208	653.59	300.641	283.536	1032.23	1270.88	685.096	818.879	1229.35	1287.54	411.458
232.5	615.581	429.229	457.471	619.071	1045.05	693.851	657.062	306.366	287.27	1038.07	1276.45	693.937	825.64	1232.4	1294	427.363
233	622.777	440.014	461.098	621.715	1050.62	697.534	660.054	311.716	290.23	1043.67	1282.19	702.764	833.195	1235.04	1301.49	443.944
233.5	629.807	450.113	464.697	623.957	1057.25	701.034	662.897	316.332	292.434	1048.81	1287.73	711.829	840.907	1237.1	1310.01	460.576
234	636.121	458.74	468.102	625.802	1064.79	704.367	665.945	320.029	294.099	1053.41	1292.82	721.059	847.971	1239.1	1319.29	476.413
234.5	640.995	465.449	471.051	627.459	1072.71	707.612	669.332	322.898	295.51	1057.42	1297.42	729.86	853.51	1241.34	1328.6	490.862
235	643.656	470.325	473.363	629.178	1080.52	710.936	672.823	324.995	296.988	1060.95	1301.67	737.487	857.102	1244.13	1337.11	503.341
235.5	643.299	473.44	474.896	631.064	1087.74	714.586	675.839	326.399	298.679	1064.1	1305.83	742.892	859.108	1247.49	1344.31	513.732
236	640.258	475.053	475.717	633.066	1094.37	718.819	678.06	327.034	300.557	1067.02	1310.11	745.754	859.976	1251.37	1350.15	522.339
236.5	634.91	475.417	476.128	634.905	1100.73	724.033	679.275	326.713	302.372	1069.89	1314.45	746.063	860.509	1255.54	1355.37	529.52
237	627.776	474.102	476.563	636.283	1107.37	730.442	679.702	325.216	303.968	1072.72	1318.69	744.447	860.952	1259.69	1361.05	535.936
237.5	619.598	470.798	477.377	636.971	1114.78	738.153	679.717	322.607	305.369	1075.65	1322.39	741.924	861.462	1263.44	1368.16	542.016
238	610.733	465.431	478.779	637.106	1123.32	747.102	679.888	319.003	306.75	1078.72	1325.3	739.196	861.887	1266.55	1377.34	548.061
238.5	601.341	458.109	480.93	637.125	1133.02	756.868	680.699	314.903	308.363	1082.01	1327.26	736.591	861.877	1268.97	1388.62	554.163
239	591.559	449.715	483.658	637.551	1143.56	767.113	682.287	310.837	310.494	1085.45	1328.19	734.309	861.495	1271.01	1401.76	560.456
239.5	581.568	441.318	486.775	638.693	1154.83	777.325	684.591	307.384	313.264	1089.07	1328.53	732.37	861.039	1273.11	1416.33	567.143
240	571.611	433.996	490.03	640.547	1166.46	787.106	687.319	304.719	316.732	1093.11	1328.69	730.707	861.276	1275.61	1431.9	574.321
240.5	562.023	428.07	493.241	642.794	1178.28	796.277	690.175	302.687	320.768	1097.54	1329.21	729.417	862.651	1278.71	1448.05	582.088
241	552.969	423.208	496.388	644.96	1189.94	804.927	692.833	301.033	325.054	1102.49	1330.46	728.567	865.331	1282.34	1464.31	590.391
241.5	544.577	418.779	499.485	646.647	1201.06	813.144	694.988	299.377	329.219	1107.8	1332.74	728.466	869.154	1286.18	1479.97	598.737
242	536.582	414.068	502.605	647.691	1211.07	820.819	696.097	297.454	332.803	1113.1	1336.13	728.894	873.226	1290	1494.05	606.401
242.5	528.826	408.655	505.439	648.334	1219.11	827.66	695.692	295.092	335.385	1117.6	1340.28	729.769	876.463	1293.72	1505.45	612.106
243	521.215	402.526	507.306	648.898	1224.57	833.213	693.352	292.372	336.435	1120.28	1344.87	730.872	877.831	1297.46	1513.23	614.955
243.5	513.482	395.971	507.262	649.514	1226.87	836.533	688.331	289.409	335.471	1120.63	1349.62	732.039	877.093	1301.08	1516.69	614.099
244	505.466	389.345	504.183	650.145	1225.49	837.034	680.579	286.302	332.332	1118.33	1354.28	733.346	874.548	1304.39	1515.51	608.346
244.5	496.965	382.703	497.257	650.432	1220.79	834.425	670.274	283.12	326.939	1113.63	1358.67	734.791	870.786	1307.07	1510.52	598.686
245	487.653	375.819	486.796	649.989	1212.99	828.708	657.599	279.799	319.774	1107.5	1362.63	736.529	866.903	1308.92	1501.93	585.75
245.5	477.16	368.28	473.647	648.644	1202.09	820.617	643.507	276.144	311.496	1101.15	1366.2	738.44	863.719	1309.95	1490.22	570.13
246	465.442	359.466	458.86	646.547	1188.86	810.664	628.8	272.079	302.557	1096.01	1369.48	740.203	861.909	1310.93	1475.74	552.708
246.5	452.585	349.385	443.77	644.142	1173.97	799.63	614.079	267.493	293.478	1092.72	1372.58	741.37	861.136	1312.34	1458.62	534.1
247	438.876	338.081	429.226	641.886	1158.25	788.114	599.541	262.379	284.424	1091.11	1375.7	741.48	860.735	1314.26	1439.84	514.696
247.5	424.477	325.821	415.651	640.065	1142.93	776.62	585.138	256.779	275.337	1090.48	1379.02	740.472	859.972	1315.94	1420.45	494.944
248	409.638	313.218	402.844	638.717	1128.88	765.723	570.704	250.949	266.031	1089.83	1382.7	738.723	858.371	1316.54	1402.21	475.45
248.5	394.34	300.666	390.374	637.664	1116.76	755.892	556.272	245.018	256.446	1088.37	1386.64	737.008	855.94	1315.71	1386.53	456.925
249	378.614	288.399	378.043	636.762	1106.54	747.57	542.016	239.174	246.829	1085.66	1390.52	735.995	852.974	1314.18	1374.4	439.872
249.5	362.728	276.429	365.98	636.041	1098.07	741.066	528.461	233.417	237.597	1081.95	1393.82	736.082	850.18	1314.87	1366.29	424.534
250	347.045	264.73	354.522	635.607	1091.33	736.253	516.061	227.691	229.234	1077.84	1396.16	737.273	848.014	1321.24	1361.54	410.925
250.5	332.108	253.252	344.213	635.722	1085.93	732.793	504.964	221.975	222.178	1074.08	1397.38	738.85	846.606	1336.82	1359.22	398.577
251	318.258	241.96	335.353	636.448	1082.02	730.151	495.34	216.134	216.522	1071.04	1397.45	739.854	845.559	1359.98	1358.21	387.182
251.5	305.768	230.996	328.185	637.768	1080.1	727.634	486.747	210.19	211.999	1068.87	1397.01	739.223	844.493	1387.52	1357.55	376.501
252	294.513	220.696	322.706	639.356	1080.07	724.871	479.073	204.164	208.485	1067.35	1396.62	736.696	843.305	1413.16	1356.64	366.67
252.5	284.379	211.366	318.421	640.892	1081.89	722.01	472.357	198.405	205.687	1066.26	1396.83	732.684	842.22	1431.08	1355.63	358.205
253	275.378	203.377	315.136	642.126	1085.29	719.603	466.743	193.26	203.633	1065.51	1397.83	727.923	841.91	1436.76	1355.12	351.679
253.5	267.636	197.095	312.592	643.005	1089.72	718.312	462.611	189.051	202.502	1065.23	1399.46	723.565	843.098	1427.83	1355.73	347.233
254	261.516	192.581	310.596	643.705	1094.54	718.76	460.475	186.151	202.273	1065.77	1401.24	720.425	846.291	1410.5	1358.31	344.927
254.5	257.681	189.891	309.102	644.486	1099.36	720.968	460.141	184.907	202.525	1067.3	1402.75	718.946	851	1390.47	1362.92	344.461
255	256.196	188.993	308.144	645.527	1103.97	724.788	461.433	185.329	202.806	1069.8	1403.81	718.866	856.506	1373.35	1369.68	345.312
255.5	256.96	189.53	307.811	647.009	1108.61	729.872	464.144	187.216	202.761	1073.07	1404.66	719.68	861.92	1361.93	1378.15	347.385
256	259.68	191.31	308.418	649.017	1113.81	735.595	467.752	190.103	203.042	1077.03	1405.77	720.887	866.766	1356.88	1387.47	350.669
256.5	263.633	194.056	310.138	651.719	1119.94	741.703	472.13	193.382	205.332	1081.37	1407.78	722.085	871.105	1357	1397.18	355.305
257	268.309	197.399	313.026	655.092	1127.54	748.186	477.115	196.645	212.132	1085.94	1411.32	723.15	875.412	1359.66	1406.98	361.517
257.5	273.429	201.177	317.157	659.139	1136.8	755.102	482.635	199.559	224.438	1090.9	1416.35	724.4	880.604	1363.52	1417.08	369.245
258	278.894	205.061	322.218	663.762	1147.55	762.375	488.43	202.151	242.665	1096.2	1422.57	725.979	887.39	1368.21	1427.76	377.895
258.5	284.787	208.864	327.787	668.625	1159.35	769.755	494.176	204.598	264.757	1101.81	1429.16	728.109	895.705	1374.13	1439.35	386.681
259	291.161	212.403	333.359	673.465	1171.49	776.866	499.666	207.225	286.611	1107.48	1435.42	730.667	905.08	1381.36	1451.87	394.669
259.5	297.867	215.696	338.502	677.919	1183.08	783.251	504.722	210.242	303.415	1113.17	1440.69	733.507	914.871	1389.34	1464.73	401.022
260	304.642	218.869	342.952	681.898	1193.32	788.483	509.428	213.585	310.023	1118.72	1444.73	736.558	924.48	1397.13	1477.09	405.077
260.5	311.182	221.879	346.608	685.357	1201.69	792.526	513.987	216.992	307	1124	1447.81	739.43	933.407	1403.69	1488.04	406.772
261	317.228	224.616	349.644	688.478	1208.16	795.513	518.74	220.079	295.581	1129.01	1450.38	742.006	941.454	1408.71	1496.89	406.303
261.5	322.638	226.879	352.208	691.311	1212.48	797.606	523.854	222.512	279.872	1133.75	1453.2	744.048	948.556	1412.86	1503.35	403.486
262	327.427	228.37	354.431	693.951	1214.91	799.101	529.224	224.136	264.173	1138.37	1456.62	745.255	954.682	1417.6	1507.63	398.532
262.5	331.681	228.972	356.247	696.491	1215.76	799.968	534.644	225.085	251.875	1142.74	1460.75	745.487	959.884	1423.98	1510.01	391.578
263	335.4	228.879	357.648	698.988	1215.3	800.256	539.903	225.47	244.507	1147.03	1465.28	744.567	964.291	1432.32	1510.87	382.429
263.5	338.56	228.437	358.41	701.562	1213.91	799.876	544.984	225.71	241.342	1151.24	1469.8	742.507	968.184	1442.13	1510.54	371.387
264	341.364	228.325	358.511	704.33	1211.93	798.718	549.822	226.014	241.146	1155.59	1473.99	739.812	971.876	1452.22	1509.09	358.877
264.5	344.046	228.932	358.082	707.484	1209.69	796.812	554.551	226.512	241.837	1160	1477.94	737.016	975.719	1461.4	1506.51	345.251
265	347.206	230.498	357.331	711.06	1207.35	794.143	559.22	227.194	242.471	1164.3	1481.99	734.519	979.922	1468.77	1502.87	330.976
265.5	351.485	232.789	356.649	714.99	1204.89	790.743	563.737	228.063	242.762	1168.17	1486.78	732.607	984.487	1474.25	1498.38	316.403
266	357.472	235.47	356.421	719.193	1202.07	786.775	567.862	229.194	242.873	1171.24	1492.48	731.408	989.193	1478.4	1493.43	301.765
266.5	365.401	238.227	357.101	723.475	1198.66	782.496	571.435	230.542	242.957	1173.52	1499.11	730.653	993.583	1481.9	1488.48	287.347
267	374.766	240.802	358.85	727.731	1194.4	778.289	574.465	232.107	243.136	1175.27	1506.48	730.05	997.486	1485.41	1484.05	273.328
267.5	384.904	243.208	361.734	731.899	1189.23	774.501	577.22	233.748	243.337	1177.14	1514.13	729.316	1000.73	1489.24	1480.66	260.077
268	394.831	245.528	365.636	735.859	1183.48	771.515	580.045	235.263	243.448	1179.8	1521.8	728.45	1003.24	1493.65	1478.34	247.844
268.5	403.641	247.864	370.047	739.411	1177.75	769.483	583.287	236.427	243.536	1183.92	1529.5	727.536	1005.06	1498.44	1476.86	236.759
269	410.739	250.119	374.392	742.099	1172.73	768.275	587.078	237.097	243.667	1189.64	1537.43	726.811	1006.36	1503.52	1475.57	227.054
269.5	415.975	252.164	378.054	743.584	1169.16	767.656	591.298	237.233	243.885	1196.64	1545.7	726.639	1007.26	1508.85	1473.96	218.54
270	420.051	253.766	380.631	743.61	1167.39	767.191	595.551	237	244.035	1204.08	1554.14	727.137	1007.97	1514.05	1471.44	211.16
270.5	423.498	254.825	381.933	742.546	1167.62	766.569	599.349	236.579	243.999	1211	1562.27	728.405	1008.75	1518.63	1467.97	204.819
271	426.665	255.369	382.011	740.876	1169.15	765.494	602.401	236.287	243.75	1216.88	1569.64	730.205	1009.58	1521.81	1463.65	199.322
271.5	429.695	255.594	381.447	739.199	1170.93	763.888	604.466	236.278	243.31	1221.72	1575.68	732.36	1010.43	1523.15	1459.17	194.545
272	432.299	255.738	380.919	738.086	1171.7	761.735	605.659	236.546	242.982	1225.73	1580.56	734.534	1010.95	1522.3	1455.43	190.387
272.5	434.209	255.975	381.03	737.573	1170.63	759.232	606.177	237.016	242.989	1229.47	1584.54	736.52	1010.72	1519.61	1452.92	186.707
273	435.331	256.422	381.912	737.479	1167.65	756.763	606.252	237.549	243.356	1233.3	1588.09	738.13	1009.37	1515.69	1451.96	183.451
273.5	435.899	257.178	383.449	737.222	1163.14	754.609	606.206	238.077	243.864	1237.46	1591.66	739.271	1006.91	1511.73	1451.97	180.698
274	436.553	258.488	385.201	736.353	1158.5	753.027	606.324	238.497	244.278	1241.62	1595.26	739.957	1003.72	1508.86	1452.59	178.511
274.5	437.857	260.45	386.694	734.762	1154.91	752.174	606.904	238.88	244.507	1245.23	1598.7	740.009	1000.53	1507.45	1453.02	177.095
275	440.029	263.299	387.677	732.798	1153.48	751.982	608.161	239.334	244.659	1247.97	1601.62	739.353	998.081	1507.21	1452.87	176.688
275.5	442.902	267.207	388.292	730.993	1154.14	752.314	610.226	240.031	245.053	1249.86	1603.73	737.941	996.768	1507.3	1451.6	177.298
276	446.108	271.961	389.069	729.878	1155.85	752.864	613.34	241.081	246.149	1251.36	1604.98	735.87	996.698	1507.1	1449.46	178.8
276.5	449.357	277.374	390.662	729.797	1157.39	753.466	617.427	242.595	248.031	1253.03	1605.55	733.33	997.354	1506.16	1447	180.75
277	452.836	283.204	393.586	730.898	1157.79	754.08	622.569	244.605	250.652	1255.56	1605.65	730.815	998.186	1504.69	1444.73	182.724
277.5	457.198	289.39	397.913	733.02	1156.99	754.825	628.828	247.108	253.776	1259.32	1605.37	728.726	998.755	1503.27	1443.27	184.498
278	463.806	295.976	403.607	735.791	1155.66	755.768	636.141	250.08	257.18	1264.43	1605.02	727.418	998.812	1502.67	1442.91	185.979
278.5	473.124	303.199	410.32	738.99	1154.97	756.97	644.311	253.369	260.861	1270.18	1604.92	726.986	998.642	1503.07	1444.06	187.415
279	485.207	311.187	417.652	742.366	1156.05	758.429	653.167	256.816	264.826	1275.89	1605.38	727.414	998.54	1504.23	1446.66	189.195
279.5	499.6	320.199	425.363	745.829	1159.42	759.972	662.406	260.334	269.148	1280.94	1606.79	728.686	999.166	1505.63	1450.24	191.823
280	514.949	330.22	433.376	749.278	1164.52	761.439	671.776	263.891	273.77	1285.22	1609.51	730.555	1000.97	1506.84	1454.22	195.526
280.5	530.213	341.1	441.677	752.707	1170.06	762.736	681.144	267.68	278.355	1288.97	1613.6	732.96	1004.11	1508.03	1458.15	200.314
281	544.579	353.013	450.406	756.093	1175.09	763.98	690.45	271.948	282.622	1292.77	1618.52	735.913	1008.62	1509.4	1461.78	206.057
281.5	558.299	366.024	459.577	759.397	1179.03	765.229	699.773	276.925	286.367	1297.1	1623.46	739.276	1014.33	1511.55	1465.19	212.502
282	572.147	380.188	469.165	762.554	1182.02	766.519	709.095	282.764	289.791	1302.26	1627.36	742.821	1020.86	1514.63	1468.54	219.598
282.5	587.089	395.478	479.117	765.378	1184.54	767.774	718.246	289.327	293.178	1307.9	1629.57	746.141	1027.49	1518.13	1472.16	227.238
283	603.333	411.547	489.126	767.537	1186.76	768.881	726.794	296.2	296.891	1313.11	1629.49	748.811	1033.49	1521.28	1475.89	235.347
283.5	620.448	427.699	498.835	768.771	1188.86	769.716	734.093	302.723	300.972	1316.88	1627.1	750.355	1038.34	1523.03	1479.12	243.829
284	637.324	442.965	507.467	768.929	1190.09	770.112	739.623	308.322	305.184	1317.87	1622.76	750.716	1041.45	1523.02	1480.89	252.43
284.5	652.57	456.663	514.572	767.922	1189.9	770.035	742.852	312.794	308.836	1315.88	1616.48	750.219	1042.55	1521.02	1480.17	260.87
285	665.062	468.476	519.815	766.022	1187.51	769.452	743.647	316.168	311.316	1310.86	1608.7	749.231	1041.6	1517	1476.31	268.921
285.5	673.88	478.258	522.894	763.481	1182.83	768.335	742.228	318.753	312.271	1303.2	1599.51	748.054	1038.46	1511.11	1469.2	276.679
286	679.38	486.343	524.146	760.247	1176.3	766.345	738.552	320.929	311.606	1293.93	1588.68	746.785	1032.92	1503.19	1459.11	284.285
286.5	682.361	493.005	524.092	756.234	1168.27	763.204	732.833	322.835	309.759	1283.93	1576.43	745.25	1024.69	1492.85	1446.72	291.939
287	683.623	498.087	523.205	750.966	1159.2	758.716	725.194	324.362	307.111	1273.63	1562.89	743.141	1013.49	1480.12	1432.86	299.707
287.5	683.842	501.569	521.927	743.707	1149.18	752.79	715.454	325.12	303.976	1263.13	1548.09	740.332	999.271	1465.14	1417.99	307.484
288	683.148	503.092	520.371	734.457	1138.01	745.729	703.541	324.446	300.507	1251.9	1532.28	736.802	982.412	1448.18	1402.58	314.917
288.5	681.181	502.294	518.255	723.336	1125.67	737.982	689.649	322.202	296.609	1239.11	1515.76	733.057	963.374	1430.13	1386.72	321.689
289	677.591	499.54	515.287	710.909	1112.34	730.204	673.893	318.507	291.997	1224.35	1498.59	729.453	943.222	1411.32	1370.5	327.751
289.5	671.903	495.2	511.166	698.038	1098.47	722.84	656.802	313.639	286.554	1207.3	1480.79	726.284	923.013	1391.88	1353.88	333.143
290	663.591	489.766	505.67	685.554	1084.8	716.106	638.794	308.144	280.155	1187.9	1462.24	723.448	903.543	1371.51	1336.92	338.29
290.5	653.032	483.803	498.984	674.054	1071.89	709.942	620.114	302.486	272.862	1166.8	1442.89	720.622	885.391	1350.1	1319.87	343.384
291	640.568	477.614	491.409	663.456	1060.03	704.083	601.05	296.931	264.879	1144.96	1423.12	717.314	868.421	1327.95	1302.86	348.503
291.5	626.701	471.199	483.125	653.605	1048.88	698.179	581.74	291.466	256.385	1123.44	1403.44	713.133	852.092	1305.72	1286.11	353.407
292	611.961	464.448	474.402	644.298	1037.74	691.983	562.355	285.941	247.67	1103.05	1384.8	708.086	835.765	1284.36	1269.71	357.732
292.5	596.669	457.258	465.406	635.41	1025.81	685.319	543.096	280.126	239.091	1084.48	1367.85	702.332	818.921	1264.75	1253.9	360.931
293	581.05	449.386	456.355	626.867	1012.82	678.175	524.187	274.075	231.008	1068.21	1352.94	696.281	801.425	1247.33	1238.65	362.915
293.5	565.163	441.024	447.53	618.613	999.047	670.721	505.827	267.821	223.733	1054.01	1340.15	690.253	783.319	1231.93	1223.9	363.708
294	549.165	432.131	439.176	610.525	985.171	663.235	488.139	261.46	217.283	1041.7	1328.31	684.406	765.052	1217.97	1209.65	363.258
294.5	533.161	422.559	431.588	602.318	972.052	656.033	471.19	255.072	211.617	1030.62	1316.3	678.564	747.17	1204.61	1195.95	361.593
295	517.325	412.349	424.672	593.693	960.208	649.375	455.142	248.664	206.425	1020.14	1302.87	672.472	730.173	1191.56	1182.95	358.567
295.5	501.993	401.506	418.167	584.517	949.866	643.413	440.09	242.172	201.323	1009.7	1288.12	665.813	714.157	1178.84	1170.62	353.889
296	487.386	390.103	411.581	574.933	940.51	638.255	426.185	235.477	195.992	999.2	1272.64	658.354	699.107	1166.69	1158.95	347.575
296.5	473.733	378.641	404.492	565.305	931.404	633.89	413.742	228.569	190.282	988.866	1257.73	650.058	684.722	1155.39	1147.72	340.015
297	461.128	367.655	396.85	555.923	921.948	630.118	402.545	221.505	184.276	979.081	1244.59	640.995	670.745	1145.12	1136.39	332.09
297.5	449.546	357.556	389.12	547.261	912.062	626.665	392.407	214.407	178.231	970.271	1233.94	631.548	657.148	1135.69	1124.6	324.761
298	438.843	348.511	382.05	539.493	902.061	623.251	383.113	207.381	172.503	962.489	1226.31	622.224	643.84	1126.88	1112.16	318.701
298.5	428.847	340.363	376.448	532.662	892.385	619.655	374.264	200.506	167.266	955.702	1220.44	613.588	631.004	1118.33	1099.49	314.024
299	419.288	332.804	372.759	526.679	883.427	615.7	365.777	193.801	162.727	949.509	1215.23	606.039	618.886	1109.84	1087.12	310.077
299.5	410.024	325.415	370.73	521.375	875.193	611.407	357.794	187.353	158.8	943.37	1209.57	599.82	607.569	1101.53	1075.86	305.883
300	401.109	317.956	369.861	516.76	867.527	606.811	350.585	181.283	155.464	937.067	1203.17	595.113	596.992	1093.63	1066.37	300.219
300.5	392.911	310.385	369.223	512.695	860.042	602.144	344.325	175.804	152.668	930.596	1196.09	591.417	587.034	1086.42	1059.04	292.374
301	385.806	302.865	368.053	509.221	852.584	597.704	339.132	171.018	150.327	924.151	1188.83	588.231	577.692	1080.05	1053.44	281.932
301.5	380.276	295.633	366.074	506.279	845.364	593.722	334.746	166.99	148.274	918.17	1181.95	584.799	568.827	1074.61	1048.76	269.576
302	376.342	288.838	363.574	503.911	838.709	590.337	330.881	163.52	146.315	912.75	1175.94	580.693	560.545	1070.01	1044.3	256.177
302.5	373.75	282.445	361.04	502.021	832.859	587.525	327.183	160.318	144.326	907.974	1171.07	575.613	552.851	1066.21	1039.64	242.398
303	371.947	276.391	358.892	500.49	827.834	585.29	323.297	157.013	142.099	903.806	1167.21	569.64	545.846	1062.92	1034.57	228.979
303.5	369.701	270.528	357.272	499.318	823.217	583.511	319.061	153.336	139.583	900.078	1164.28	563.129	539.573	1059.98	1029.1	216.274
304	366.269	264.693	355.982	498.261	818.718	582.164	314.413	149.203	136.784	896.574	1161.93	556.478	533.627	1057.49	1023.37	204.653
304.5	360.941	258.787	354.641	497.15	814.135	581.047	309.386	144.756	133.814	893.135	1159.81	550.074	527.931	1055.39	1017.38	194.222
305	353.832	252.696	352.807	495.767	809.537	580.036	304.018	140.341	130.783	889.647	1157.5	544.265	522.263	1053.78	1011.27	185.03
305.5	345.212	246.331	350.295	493.999	805.535	578.919	298.457	136.239	127.723	885.999	1154.66	539.359	516.525	1052.55	1005.06	177.118
306	335.549	239.632	347.101	491.852	802.577	577.433	292.82	132.545	124.719	882.132	1151.21	535.246	510.707	1051.55	999.145	170.198
306.5	325.542	232.652	343.523	489.439	800.893	575.564	287.437	129.103	121.751	878.087	1147.27	531.739	504.968	1050.46	994.021	163.949
307	315.715	225.505	339.83	487.129	800.084	573.424	282.524	125.682	118.878	874.134	1143.52	528.618	499.631	1048.94	990.158	158.2
307.5	306.449	218.31	336.209	485.336	799.58	571.385	278.172	122.063	116.194	870.696	1140.56	525.818	495.02	1046.8	987.769	152.688
308	297.839	211.216	332.845	484.288	798.858	569.894	274.221	118.185	113.798	868.258	1138.89	523.151	491.426	1044.1	986.732	147.43
308.5	289.842	204.299	329.718	484.016	797.533	569.294	270.32	114.176	111.762	866.903	1138.45	520.683	488.931	1041.07	986.645	142.563
309	282.315	197.574	326.837	484.248	795.853	569.667	266.155	110.337	110.005	866.517	1138.68	518.41	487.375	1038.08	986.752	138.231
309.5	274.917	190.983	323.95	484.57	794.225	570.85	261.233	106.876	108.406	866.585	1138.88	516.505	486.426	1035.46	986.491	134.408
310	267.355	184.492	320.904	484.469	793.296	572.366	255.438	103.832	106.701	866.549	1138.29	514.937	485.548	1033.54	985.624	130.951
310.5	259.404	178.273	317.514	483.611	793.103	573.863	248.873	100.974	104.732	865.978	1136.7	513.628	484.328	1032.31	984.359	127.605
311	251.068	172.476	313.682	481.912	793.436	575.028	241.835	98.0221	102.485	864.712	1134.13	512.315	482.491	1031.68	983.109	124.24
311.5	242.658	167.274	309.498	479.545	793.809	575.838	234.848	94.7048	100.077	863.029	1131.36	510.806	479.995	1031.43	982.434	120.906
312	234.784	162.959	305.121	477.04	793.865	576.402	228.396	91.0424	97.6886	861.438	1129.08	509.097	477.244	1031.33	982.808	117.885
312.5	227.984	159.476	301	474.868	793.609	576.776	223.008	87.2634	95.4876	860.419	1127.91	507.234	474.665	1031.18	984.464	115.478
313	222.587	156.785	297.413	473.485	793.278	577	218.754	83.8377	93.5698	860.177	1127.92	505.482	472.692	1030.81	987.344	114.033
313.5	218.625	154.773	294.766	472.968	793.531	576.917	215.501	81.1924	91.9772	860.705	1128.87	504.115	471.516	1030.35	990.88	113.581
314	215.69	153.187	293.083	473.385	794.626	576.559	213.046	79.4307	90.7082	861.62	1130.45	503.346	471.05	1029.82	994.228	113.818
314.5	213.32	151.841	292.231	474.371	796.666	576.015	210.896	78.5589	89.6921	862.648	1132.11	503.202	471.043	1029.43	996.473	114.36
315	211.111	150.643	291.992	475.663	799.104	575.517	208.681	78.2094	88.9801	863.505	1133.53	503.57	471.045	1029.12	997.165	114.85
315.5	208.818	149.536	292.048	476.978	801.338	575.367	205.997	78.1108	88.649	864.026	1134.47	504.267	470.9	1029.12	996.172	115.189
316	206.545	148.572	292.18	477.887	802.675	575.68	202.916	78.0677	88.6828	864.207	1135.02	505.195	470.479	1029.53	994.178	115.504
316.5	204.702	147.965	292.247	478.3	802.882	576.457	199.725	78.1392	89.0624	864.125	1135.44	506.262	469.899	1030.49	992.187	116.011
317	203.461	147.849	292.237	478.118	802.053	577.371	196.947	78.4237	89.5277	864.101	1135.92	507.459	469.427	1032.01	991.405	116.903
317.5	203.147	148.416	292.178	477.633	800.743	578.102	195.014	79.0867	89.8487	864.233	1136.64	508.682	469.293	1033.95	992.532	118.23
318	203.746	149.698	292.233	476.908	799.501	578.337	194.19	80.0141	89.7475	864.722	1137.49	509.697	469.752	1036.17	995.453	119.689
318.5	205.208	151.433	292.525	476.156	798.791	577.889	194.726	80.9411	89.1533	865.589	1138.17	510.036	470.61	1038.19	999.258	120.854
319	207.442	153.253	293.189	475.601	798.723	576.999	196.25	81.5298	88.2603	866.643	1138.21	509.215	471.655	1039.57	1002.52	121.227
319.5	210.39	154.686	294.391	475.411	799.123	575.929	198.421	81.4899	87.3711	867.543	1137.16	507.138	472.555	1039.88	1004.33	120.577
320	214.166	155.505	296.169	476.035	799.64	575.096	200.863	80.8672	87.0259	867.875	1134.7	504.018	472.813	1039.09	1004.1	118.784
320.5	218.844	155.673	298.643	478.083	799.739	574.677	203.364	79.8586	87.4095	867.237	1131.34	500.369	472.101	1037.57	1002.13	115.813
321	224.475	155.405	301.871	482.692	799.28	574.802	205.993	79.0042	88.6942	865.644	1127.68	496.918	470.104	1035.92	999.174	111.899
321.5	231	155.15	305.865	490.57	798.062	575.354	209.182	78.6702	90.6638	863.51	1124.4	494.387	467.081	1034.54	995.912	107.199
322	238.434	155.383	310.777	501.408	796.167	576.086	213.346	79.2157	93.0585	861.372	1121.79	493.281	463.296	1033.55	993.107	101.878
322.5	246.819	156.56	316.765	514.47	793.635	576.644	218.882	80.5157	95.686	859.749	1119.81	493.239	459.018	1032.7	990.738	96.2459
323	256.325	158.734	323.877	527.254	790.782	576.594	226.184	82.3115	98.4991	858.88	1118.15	493.539	454.747	1031.68	988.71	90.562
323.5	267.365	162.132	332.285	536.986	787.833	575.865	235.129	84.3996	101.677	858.792	1116.4	493.186	450.721	1030.14	986.829	85.1675
324	280.426	166.881	342.146	540.162	785.115	574.463	245.614	86.6887	105.547	859.054	1114.5	491.668	447.202	1028.12	985.137	80.2364
324.5	296.173	173.201	353.447	535.326	782.865	572.73	257.612	89.3939	110.235	859.239	1112.74	488.725	444.236	1026.12	983.993	75.9801
325	315.505	181.352	366.354	523.538	781.235	571.075	271.037	92.8909	115.654	859.041	1111.67	484.528	441.865	1024.88	983.519	72.4638
325.5	338.291	191.579	380.715	507.304	780.363	569.985	285.967	97.4754	121.711	858.505	1111.65	479.845	440.131	1024.87	984.087	69.5674
326	364.354	203.931	396.277	490.997	780.087	569.858	302.678	103.301	128.075	857.871	1112.54	475.354	438.962	1026.17	985.49	67.2107
326.5	393.43	218.382	412.818	477.672	780.33	570.796	321.095	110.325	134.667	857.591	1113.7	471.767	438.456	1028.33	987.444	65.2434
327	424.544	234.489	429.951	469.965	780.757	572.755	340.954	118.009	141.576	857.974	1114.46	469.376	438.722	1030.81	989.304	63.5387
327.5	456.686	251.483	447.174	467.286	781.398	575.377	361.701	125.9	149.044	859.211	1114.54	468.297	439.862	1033.05	990.673	61.9624
328	488.628	268.856	463.988	468.036	782.266	578.166	382.297	133.601	157.015	861.32	1114.27	468.438	441.836	1034.97	991.534	60.4607
328.5	519.026	285.789	479.857	470.338	783.471	580.676	401.631	140.878	165.185	864.043	1114.61	469.468	444.544	1036.76	992.069	58.9882
329	546.269	301.464	494.258	472.076	784.863	582.515	418.405	147.506	172.879	867.095	1116.73	471.104	447.584	1038.78	992.73	57.5903
329.5	568.158	314.762	506.279	472.58	786.235	583.349	431.65	153.255	179.302	870.105	1120.91	473.116	450.627	1041.46	993.781	56.3024
330	583.565	324.847	515.292	471.971	787.213	583.052	440.695	157.871	183.591	872.754	1126.79	475.034	453.325	1044.8	995.584	55.2289
330.5	591.344	331.018	520.797	471.178	787.498	581.707	444.97	160.84	185.48	874.864	1132.97	476.495	455.663	1048.97	997.995	54.5185
331	590.016	332.1	521.759	470.648	787.005	579.663	444.543	161.601	185.036	876.376	1137.99	477.141	457.807	1053.49	1000.64	54.2269
331.5	580.35	328.443	518.074	470.651	786.095	577.5	439.191	160.101	182.379	877.41	1140.48	477.051	460.023	1058.29	1002.93	54.3273
332	563.036	320.69	510.184	470.857	785.442	575.914	429.075	156.285	178.201	878.068	1140.42	476.486	462.585	1063.41	1004.66	54.7212
332.5	538.953	309.363	498.283	471.068	785.549	575.467	414.913	150.589	172.789	878.258	1138.63	475.841	465.398	1068.64	1005.95	55.299
333	510.466	295.704	483.344	471.107	786.618	576.399	397.217	143.633	166.236	878.049	1136.43	475.482	468.313	1073.9	1007.18	55.9544
333.5	479.333	280.718	466.418	471.271	788.463	578.556	377.09	135.914	158.7	877.287	1135.24	475.62	471.041	1078.83	1009.05	56.6858
334	447.444	265.245	448.464	471.832	790.528	581.472	355.741	128.045	150.367	875.946	1135.56	476.209	473.37	1083.39	1012.07	57.5407
334.5	416.241	250.064	430.593	472.999	792.168	584.513	334.269	120.377	141.648	874.087	1137.1	476.961	475.363	1087.29	1016.68	58.601
335	386.609	235.635	413.637	474.489	793.091	587.106	313.482	113.2	133.083	872.133	1138.8	477.554	477.246	1090.41	1022.49	60.0074
335.5	359.247	222.408	398.286	476.022	793.398	588.903	293.804	106.574	125.194	870.407	1139.7	477.812	479.136	1092.76	1028.82	61.7414
336	334.148	210.319	384.792	477.307	793.786	589.843	275.639	100.478	118.415	869.197	1139.02	477.773	480.899	1094.32	1034.68	63.802
336.5	311.352	199.22	372.919	478.121	794.783	590.288	258.994	94.923	112.738	868.483	1137.02	477.66	482.217	1095.03	1039.42	66.1519
337	290.908	189	362.545	478.545	796.788	590.712	243.852	89.7628	108.013	868.015	1134.38	477.818	482.893	1095.05	1042.82	68.7433
337.5	272.556	179.457	353.402	478.665	799.655	591.491	230.335	84.9069	103.975	867.534	1132.1	478.375	482.821	1094.57	1045.06	71.5732
338	256.409	170.585	345.458	478.854	803.046	592.768	218.437	80.336	100.352	866.803	1130.9	479.455	482.428	1093.94	1046.88	74.7472
338.5	242.664	162.756	338.938	479.153	806.269	594.44	208.168	76.0519	97.0401	866.068	1130.86	480.913	482.609	1093.76	1048.98	78.3825
339	231.167	156.205	333.807	479.542	808.905	596.32	199.534	72.1641	93.9997	865.586	1131.66	482.668	484.281	1094.37	1051.99	82.6473
339.5	221.944	151.309	330.098	479.897	810.861	598.192	192.19	68.9664	91.2533	865.911	1132.6	484.69	487.689	1095.95	1056.15	87.8212
340	214.836	148.568	327.655	480.106	812.472	600	185.826	66.7788	88.9757	867.255	1133.34	487.25	492.523	1098.13	1061.3	94.0548
340.5	209.365	147.581	325.973	480.097	814.387	601.833	180.268	65.7025	87.3535	869.494	1133.8	490.661	497.915	1100.57	1066.93	101.457
341	205.165	147.895	324.6	479.861	817.123	603.921	175.232	65.7622	86.5485	872.069	1134.47	495.304	502.92	1102.79	1072.4	110.031
341.5	201.86	149.024	323.306	479.547	821.132	606.372	170.647	66.6287	86.6265	874.407	1135.85	501.144	506.799	1104.58	1077.24	119.505
342	199.169	150.498	322.08	479.409	826.412	609.023	166.698	67.8794	87.4636	875.965	1138.4	507.866	509.418	1105.68	1081.4	129.62
342.5	197.007	152.213	321.09	479.701	832.897	611.496	163.473	69.1393	88.6446	876.552	1141.78	514.98	511.142	1106.25	1085.09	140.097
343	195.423	154.417	320.605	480.678	839.896	613.383	161.103	70.0185	89.7204	876.31	1145.28	521.799	512.493	1106.31	1088.9	150.673
343.5	194.464	157.3	320.736	482.301	846.811	614.481	159.508	70.4678	90.2758	875.702	1147.98	527.793	514	1105.91	1093.29	161.175
344	193.985	161.022	321.363	484.125	852.881	614.911	158.292	70.5194	90.1573	875.331	1149.42	532.685	515.703	1104.98	1098.49	171.393
344.5	193.77	165.291	322.256	485.761	857.382	615.077	157.06	70.3861	89.4021	875.417	1149.45	536.565	517.332	1103.48	1104.2	181.065
345	193.45	169.427	323.059	486.708	859.969	615.558	155.421	70.2195	88.3667	876.135	1148.42	539.631	518.603	1101.58	1109.52	189.6
345.5	192.537	172.431	323.417	486.866	860.643	616.779	153.254	69.9719	87.4456	877.27	1147.06	541.986	519.254	1099.49	1113.52	196.342
346	190.597	173.459	323.005	486.331	859.868	618.586	150.644	69.6226	86.7627	878.597	1145.94	543.597	519.063	1097.64	1115.47	200.888
346.5	187.285	172.473	321.718	485.569	858.197	620.36	147.793	69.0091	86.1665	879.827	1145.43	544.343	518.033	1096.22	1115.3	202.906
347	182.467	169.663	319.58	485.136	856.154	621.432	144.988	68.0987	85.3024	880.744	1145.55	543.854	516.23	1095.37	1113.42	202.471
347.5	176.405	165.734	316.601	485.248	854.28	621.307	142.308	66.9331	83.8252	881.473	1146.34	542.332	513.905	1094.87	1110.76	200.374
348	169.762	161.553	313.105	485.704	852.728	619.868	139.595	65.6832	81.6167	882.175	1147.79	540.133	511.22	1094.68	1108.13	197.357
348.5	163.454	157.918	309.345	485.927	851.386	617.613	136.666	64.5321	78.8818	883.18	1150	538.036	508.882	1094.68	1106.25	194.345
349	158.222	155.211	305.868	485.615	850.267	615.194	133.298	63.5713	75.9502	884.571	1153.11	536.677	507.518	1095.09	1105.28	191.838
349.5	154.479	153.377	303.017	484.703	849.08	613.315	129.487	62.8173	73.2546	886.253	1157.02	536.584	507.659	1096.19	1104.96	190.002
350	152.374	152.202	301.072	483.578	847.678	612.171	125.454	62.2125	71.0321	888.07	1161.18	537.794	509.352	1098.28	1104.98	188.463
350.5	151.304	151.386	299.863	482.792	845.905	611.519	121.535	61.7341	69.2787	889.593	1164.82	539.636	512.441	1101.48	1105.05	186.749
351	150.578	150.756	299.025	482.866	843.737	610.845	118.037	61.3443	67.759	890.637	1167.17	541.469	516.44	1105.84	1105.23	184.523
351.5	149.317	150.172	298.241	483.935	841.094	609.727	114.936	60.9783	66.2934	891.196	1167.88	542.626	520.7	1110.96	1105.49	181.644
352	147.175	149.594	297.071	485.602	838.02	608.062	112.16	60.5267	64.8425	891.542	1166.93	542.883	524.82	1116.38	1106.03	178.236
352.5	144.255	148.994	295.409	487.119	834.718	606.026	109.398	59.8023	63.4631	892.077	1165.25	542.155	528.582	1121.8	1106.99	174.317
353	141.047	148.179	293.149	487.861	831.484	604.071	106.47	58.5505	62.2738	892.922	1163.81	540.497	532.156	1127.08	1108.36	169.96
353.5	138.063	146.995	290.549	487.65	828.667	602.476	103.292	56.6139	61.3359	894.042	1163.51	538.193	535.645	1132.41	1109.86	165.07
354	135.467	145.268	287.801	486.735	826.622	601.374	100.031	53.92	60.531	894.983	1164.6	535.367	539.111	1138.07	1111.36	159.422
354.5	133.121	142.864	285.152	485.589	825.416	600.626	96.9682	50.7732	59.6455	895.326	1166.78	532.062	542.284	1144.18	1112.56	152.906
355	130.421	139.743	282.744	484.79	824.784	599.888	94.3096	47.5456	58.4043	894.744	1169.46	528.576	544.854	1150.58	1113.2	145.74
355.5	126.891	135.958	280.668	484.547	824.238	598.947	92.1197	44.6067	56.7526	893.339	1171.69	525.188	546.509	1156.5	1112.94	138.133
356	122.094	131.441	279.003	484.884	823.348	597.766	90.2539	42.1174	54.7276	891.661	1172.91	522.128	547.008	1161.11	1111.66	130.367
356.5	116.394	126.459	277.653	485.593	821.913	596.488	88.6167	40.0492	52.5462	890.295	1172.59	519.5	546.222	1163.3	1109.4	122.61
357	110.408	121.276	276.479	486.488	819.915	595.305	87.0346	38.2241	50.4263	889.932	1171.21	517.211	544.137	1162.24	1106.21	114.918
357.5	104.907	116.332	275.268	487.436	817.69	594.229	85.5024	36.4673	48.4776	890.89	1169.43	515.032	540.93	1158.43	1102.48	107.277
358	100.313	112.038	273.832	488.4	815.624	593.379	84.0203	34.6439	46.7486	893.207	1167.97	512.581	536.92	1152.72	1098.44	99.7581
358.5	96.6676	108.791	272.067	489.437	814.405	592.582	82.7099	32.7913	45.1993	896.475	1167.41	509.609	532.562	1146.49	1094.37	92.6779
359	93.8517	107.037	270.023	490.565	814.177	591.775	81.5544	31.0335	43.8662	900.249	1167.96	506.288	528.27	1140.91	1090.3	86.4078
359.5	91.4224	106.499	267.944	491.814	814.858	590.936	80.5397	29.4849	42.8208	904.045	1169.72	503.063	524.477	1136.79	1086.24	81.2693
360	89.2889	106.953	266.206	493.205	816.066	590.268	79.5208	28.2122	42.1425	907.511	1172.22	500.529	521.483	1134.32	1082.08	77.4693
360.5	87.5643	108.151	265.067	494.851	817.483	589.985	78.4455	27.1173	41.9098	910.484	1175.07	499.074	519.403	1133.23	1077.81	74.7002
361	86.4093	109.769	264.604	496.957	818.86	590.187	77.2938	26.124	41.9828	912.744	1177.86	498.726	518.168	1132.92	1073.49	72.5202
361.5	85.9125	111.636	264.598	499.586	820.033	590.911	76.2017	25.1797	42.1136	914.437	1180.43	499.289	517.583	1132.98	1069.48	70.476
362	85.7148	113.766	264.763	502.634	821.075	592.07	75.3325	24.3499	42.0299	915.749	1182.78	500.194	517.618	1133.2	1065.95	68.2997
362.5	85.2401	116.146	264.83	505.765	822.048	593.578	74.7736	23.7092	41.5301	917.083	1185.02	500.85	518.202	1133.72	1063.23	65.9391
363	83.923	118.793	264.613	508.545	823.181	595.179	74.4723	23.3902	40.6544	918.659	1187.29	500.691	519.349	1134.73	1061.38	63.6162
363.5	81.601	121.577	264.165	510.674	824.32	596.729	74.2731	23.438	39.5401	920.538	1189.66	499.566	521.216	1136.15	1060.44	61.6715
364	78.6544	124.32	263.639	512.089	825.427	598.043	74.103	23.7702	38.6409	922.741	1192.15	497.656	523.679	1138.03	1060.21	60.3038
364.5	75.8315	126.824	263.328	513.1	826.427	599.039	73.7863	24.2912	38.1572	925.078	1194.73	495.385	526.607	1140.16	1060.35	59.5326
365	73.9923	129.02	263.291	514.272	827.554	599.64	73.3536	24.8779	38.2272	927.482	1197.49	493.314	529.784	1142.41	1060.62	59.1405
365.5	73.6144	130.923	263.403	516.153	829.08	599.896	72.8183	25.4613	38.7174	929.957	1200.49	491.783	533.001	1144.56	1060.88	58.9986
366	74.7289	132.664	263.407	519.073	831.442	600.019	72.3698	26.0128	39.4108	932.623	1203.88	491.057	536.083	1146.45	1061.14	58.9641
366.5	76.6491	134.358	263.113	522.894	834.745	600.288	72.0749	26.4892	40.0978	935.634	1207.57	490.955	538.777	1148.04	1061.53	58.9245
367	78.3843	135.991	262.485	527.026	838.864	601.017	71.9733	26.864	40.6191	938.798	1211.34	491.23	541.005	1149.12	1062.27	58.7447
367.5	79.4007	137.391	261.641	530.751	843.397	602.331	71.9827	27.0694	40.9641	941.873	1214.82	491.512	542.605	1149.75	1063.49	58.1925
368	79.6431	138.163	260.899	533.475	847.545	604.167	72.0967	27.0077	41.15	944.423	1217.68	491.555	543.402	1149.85	1065.26	57.0872
368.5	79.5693	138.051	260.591	535.033	850.741	606.256	72.3859	26.6548	41.24	946.118	1219.96	491.274	543.431	1149.66	1067.4	55.2403
369	79.7216	136.879	260.91	535.646	852.687	608.076	72.874	26.0571	41.2682	946.822	1221.97	490.832	542.905	1149.29	1069.89	52.9859
369.5	80.5359	134.756	261.709	535.888	853.803	609.339	73.5911	25.3823	41.2595	946.786	1224.31	490.445	542.228	1148.9	1072.56	51.0089
370	82.0942	132.022	262.718	536.305	854.631	609.971	74.496	24.798	41.2327	946.559	1227.43	490.274	541.836	1148.54	1075.41	50.292
370.5	84.0437	129.03	263.665	537.37	855.841	610.341	75.4416	24.4656	41.223	946.759	1231.45	490.473	542.114	1148.25	1078.46	51.5841
371	85.7996	126.071	264.454	539.05	857.88	610.89	76.2509	24.4591	41.3272	947.878	1236.05	491.009	543.25	1148.16	1081.62	54.8559
371.5	86.7671	123.182	265.112	541.094	860.878	612.053	76.7642	24.7351	41.5595	950.24	1240.34	491.874	544.93	1148.52	1084.88	59.6232
372	86.8087	120.234	265.763	542.99	864.845	613.987	77.2588	25.1583	41.9871	953.807	1243.67	493.022	546.638	1149.45	1087.99	64.3327
372.5	86.1354	116.951	266.59	544.49	869.288	616.492	78.0274	25.5033	42.6116	958.17	1245.68	494.4	547.798	1150.83	1090.98	67.364
373	85.1656	113.095	267.555	545.558	873.993	619.157	79.5135	25.5749	43.3953	962.86	1246.77	495.965	548.302	1152.41	1094.01	66.8017
373.5	84.2578	108.665	268.493	546.377	878.666	621.462	81.828	25.2789	44.2852	967.301	1247.76	497.543	548.239	1153.8	1097.51	62.1133
374	83.8144	103.93	269.024	547.393	883.202	623.199	84.9018	24.6989	45.1789	971.136	1249.57	499.045	548.066	1154.74	1101.93	54.3839
374.5	84.0105	99.2591	269.086	548.843	887.512	624.567	88.3838	24.017	46.0526	974.235	1252.88	500.441	548.346	1155.17	1107.3	44.8777
375	84.9488	94.9634	268.79	550.855	891.581	626.085	91.631	23.4749	46.8105	976.746	1257.72	501.809	549.513	1155.59	1113.39	35.6896
375.5	86.4796	91.212	268.52	553.132	895.698	628.288	94.273	23.2917	47.5116	979.209	1263.94	503.35	551.736	1156.77	1119.68	28.0947
376	88.4242	88.0556	268.721	555.442	900.038	631.478	96.1833	23.6242	48.2563	982.202	1271.03	505.274	554.724	1159.57	1125.67	23.1174
376.5	90.5627	85.4036	269.789	557.529	904.904	635.51	97.7745	24.4822	49.2128	986.435	1278.47	507.651	558.311	1164.1	1131.05	20.2915
377	92.5925	83.1914	271.78	559.357	910.428	640.033	99.644	25.7081	50.604	991.792	1286.07	510.296	562.377	1169.96	1136.21	18.8626
377.5	94.3976	81.4071	274.362	561.137	916.591	644.518	102.295	27.0741	52.495	997.922	1293.53	512.896	567.17	1176.77	1141.88	18.0589
378	95.9529	80.2565	277.064	563.178	923.099	648.555	105.876	28.3042	54.9121	1004.22	1300.74	515.115	572.974	1183.77	1148.96	17.1064
378.5	97.4519	79.7242	279.276	566.006	929.586	652.1	110.244	29.2727	57.6566	1010.09	1307.46	516.795	580.119	1190.74	1157.77	15.9016
379	99.1009	79.6924	280.802	569.659	935.937	655.49	115.022	30.0039	60.4776	1015.26	1313.83	518.037	588.512	1197.72	1167.96	14.6603
379.5	101.146	80.0522	281.671	574.169	942.481	659.109	119.871	30.6895	63.146	1019.82	1320.1	519.269	597.782	1204.89	1178.68	13.6975
380	103.619	80.43	282.324	579.425	949.763	663.201	124.506	31.577	65.5866	1024.2	1326.82	520.865	607.37	1212.47	1189.04	13.0725
380.5	106.421	80.6168	283.196	585.117	958.36	667.727	128.917	32.9072	67.8581	1028.81	1334.69	523.19	616.662	1220.34	1198.48	12.642
381	109.222	80.4879	284.685	590.988	968.442	672.438	133.171	34.7644	70.0147	1034.06	1343.77	526.252	625.555	1228.42	1207.11	12.0522
381.5	111.803	80.1142	286.869	596.859	979.609	676.955	137.444	37.0018	72.2114	1039.89	1353.78	529.914	634.287	1236.63	1215.52	11.0265
382	114.059	79.6581	289.581	602.745	991.191	681.142	141.794	39.3504	74.4603	1046.31	1363.74	533.953	643.444	1245.27	1224.49	9.40486
382.5	116.097	79.2928	292.463	608.746	1002.28	685.142	146.248	41.4958	76.7794	1053.33	1373.15	538.085	653.613	1254.78	1234.66	7.43627
383	118.113	79.1848	295.054	615.074	1012.32	689.381	150.984	43.2578	79.0652	1061.2	1381.94	542.162	665.033	1265.56	1246.31	5.52938
383.5	120.353	79.3526	297.029	621.899	1021.54	694.311	156.199	44.6751	81.3393	1070.07	1390.88	546.189	677.716	1277.91	1259.24	4.20942
384	123.064	79.7772	298.303	629.294	1030.67	700.253	162.163	46.0319	83.7147	1080.13	1401.02	550.29	691.571	1291.6	1273.07	3.63776
384.5	126.17	80.4865	299.11	637.16	1040.55	707.209	169.096	47.6683	86.2762	1091.23	1413.6	554.668	706.479	1306.27	1287.62	3.77575
385	129.655	81.4936	299.781	645.241	1051.77	714.879	177.081	49.9343	89.0752	1103.04	1428.74	559.581	722.4	1321.74	1302.85	4.38651
385.5	133.363	82.7819	300.715	653.252	1064.42	722.97	186.034	52.951	92.0989	1115.15	1445.8	565.175	739.607	1337.68	1318.77	5.07652
386	137.287	84.2356	302.133	661.167	1078.31	731.269	195.891	56.6507	95.3157	1127.25	1463.59	571.399	758.224	1354.48	1335.51	5.53227
386.5	141.353	85.7031	304.136	669.102	1093.23	739.701	206.401	60.952	98.6365	1139.51	1480.83	578.09	778.26	1372.45	1353.1	5.59354
387	145.526	87.0243	306.683	677.757	1109.01	748.331	217.343	65.5892	102.034	1152.31	1497.25	584.868	799.588	1391.82	1371.67	5.35609
387.5	149.759	88.1742	309.626	687.97	1125.75	757.494	228.673	70.4189	105.65	1165.88	1513.17	591.38	821.893	1412.59	1391.62	5.04075
388	154.058	89.3251	312.758	700.305	1143.97	767.189	240.218	75.3848	109.602	1180.59	1529.58	597.364	844.967	1434.65	1413.47	4.91945
388.5	158.461	90.8601	315.911	714.998	1163.78	777.45	251.929	80.4238	114.141	1196.5	1547.33	602.861	868.972	1458.05	1437.87	5.08036
389	163.04	92.9374	319.028	731.778	1185.19	788.234	263.894	85.559	119.337	1213.35	1567.37	608.376	894.074	1482.77	1465.08	5.44709
389.5	167.952	95.6648	322.061	749.896	1208.28	799.523	276.363	90.7857	125.145	1231.07	1589.66	614.475	920.703	1509.21	1494.92	5.82882
390	173.348	98.8633	325.028	768.474	1232.78	811.415	289.725	96.2	131.556	1249.69	1614.12	621.682	949.821	1537.29	1526.88	6.03846
390.5	179.32	102.195	327.916	786.963	1258.64	824.194	304.665	101.838	138.434	1269.39	1640.91	630.23	981.71	1567.57	1560.49	5.96998
391	185.75	105.339	330.923	805.247	1286.17	838.051	321.536	107.89	145.734	1290.38	1669.6	640.185	1016.8	1600.32	1595.45	5.6338
391.5	192.416	108.119	334.185	824.069	1315.49	853.243	340.518	114.466	153.526	1313.16	1700.02	651.203	1055.73	1635.61	1631.9	5.20443
392	198.975	110.728	337.814	844.446	1346.89	870.07	361.59	121.693	162.013	1337.87	1731.91	662.919	1098.19	1674.2	1670.87	4.82986
392.5	205.367	113.376	341.857	867.24	1381	888.441	384.307	129.665	171.221	1365.03	1764.92	675.17	1143.81	1716.91	1713.34	4.55964
393	211.672	116.383	346.17	893.137	1418.34	908.463	408.425	138.231	181.306	1394.91	1799.15	687.735	1192.75	1764.6	1760.43	4.33659
393.5	218.247	119.638	350.534	922.248	1459.36	930.41	434.156	147.307	192.334	1427.71	1835.37	700.936	1245.02	1817.98	1812.59	4.0388
394	225.561	123.03	354.649	954.275	1505.05	954.262	461.48	156.907	204.206	1463.9	1874.24	715.276	1301.18	1877.2	1869.31	3.66824
394.5	234.069	126.362	358.634	988.852	1555.39	980.278	490.792	167.202	216.998	1503.17	1916.96	731.179	1362.82	1941.67	1930.45	3.33806
395	244.018	129.654	362.71	1025.74	1610.48	1008.77	522.815	178.465	230.551	1545.18	1964.95	749.165	1430.8	2011.65	1996.09	3.22412
395.5	255.636	133.086	367.353	1064.92	1670.48	1039.81	557.694	191.175	244.955	1590.01	2017.89	769.528	1506.3	2086.79	2066.91	3.53255
396	268.538	137.034	372.797	1107.49	1734.75	1073.64	595.896	205.589	260.461	1637.74	2076.1	791.87	1590.79	2167.82	2144.37	4.22482
396.5	282.188	141.857	379.052	1154.5	1803.37	1110.57	638.257	221.91	277.138	1689.08	2139.1	815.899	1684.53	2256.54	2230.48	5.20369
397	295.924	147.765	385.935	1206.75	1877.04	1150.49	684.871	240.088	295.122	1745.97	2206.15	840.972	1787.35	2353.98	2326.45	6.16318
397.5	309.384	154.661	392.961	1265.4	1956.74	1193.74	735.955	259.684	314.735	1809.35	2277.96	866.703	1899.5	2461.2	2433.33	6.87158
398	322.525	162.148	399.849	1330.28	2043.85	1240.53	791.863	280.489	336.242	1879.97	2355.46	893.372	2020.42	2579.62	2551.29	7.23259
398.5	335.619	169.921	406.642	1400.81	2139.39	1290.82	851.973	302.331	359.787	1958.88	2438.94	922.103	2150.16	2708.43	2678.64	7.28623
399	349.303	177.763	413.867	1476.33	2242.86	1344.69	915.97	325.301	385.656	2044.87	2529.7	953.82	2288.99	2846.35	2813.52	7.28436
399.5	364.179	185.729	422.024	1555.62	2353.63	1401.9	983.606	349.848	413.614	2136.97	2628.4	989.732	2436.07	2992.74	2954.44	7.34247
400	380.987	193.935	431.575	1637.79	2470.74	1462.12	1054.28	376.428	443.445	2235.09	2734.45	1030.13	2590.6	3144.87	3100.28	7.49757
400.5	399.63	202.591	442.416	1722.86	2592.39	1525.07	1127.9	405.112	474.814	2338.32	2848.77	1074.09	2751.84	3300.78	3250.83	7.66617
401	419.868	211.819	454.106	1810.4	2717.63	1590.18	1204.35	435.789	507.028	2446.86	2971.49	1120.83	2917.96	3458.76	3405.72	7.75097
401.5	441.219	221.736	466.176	1900.08	2845.07	1656.48	1282.98	467.708	539.668	2562.37	3101.53	1168.9	3087.57	3616.4	3563.91	7.7958
402	463.153	232.257	478.23	1990.93	2972.83	1722.92	1362.51	499.854	572.222	2684.64	3238.73	1217.66	3258.2	3771.7	3723.39	7.89259
402.5	485.598	243.253	490.199	2080.69	3098.46	1788.01	1440.95	531.19	604.307	2813.2	3381.29	1267.18	3426.32	3921.59	3880.29	8.22486
403	508.822	254.752	502.284	2166.86	3218.3	1850.19	1516.22	560.82	635.448	2947.14	3526.88	1317.95	3587.44	4063.44	4029.7	8.90959
403.5	532.952	266.487	514.553	2245.56	3328.85	1907.4	1585.84	588.373	664.949	3083.77	3673	1370.31	3735.92	4193.52	4164.9	9.91689
404	557.87	278.293	526.959	2314.72	3425.91	1958.32	1647.8	613.436	692.123	3220.27	3816.46	1423.95	3866.95	4305.9	4281.45	11.1385
404.5	582.973	289.955	539.124	2372.35	3506.76	2002.16	1701.05	635.88	715.975	3352.63	3954.3	1477.46	3974.32	4397.73	4376.48	12.3306
405	607.096	301.339	550.679	2415.67	3570.08	2037.4	1743.97	655.461	735.495	3477.42	4081.77	1528.92	4054.38	4465.61	4447.14	13.4142
405.5	628.905	312.282	561.337	2445.34	3613.55	2063.76	1776.1	671.218	750.344	3590.71	4195.38	1575.83	4106.55	4504.99	4492.99	14.3439
406	647.031	322.431	570.977	2461.16	3637.26	2080.6	1797.68	682.674	759.985	3687.02	4291.56	1616.47	4129	4517.43	4514.52	15.1694
406.5	661.223	331.589	579.807	2461.38	3641.96	2086.6	1807.61	689.496	764.25	3763.67	4363.06	1649.65	4123.23	4503.08	4510.7	15.9353
407	671.959	339.431	588.086	2448.05	3626.76	2082.19	1806.39	690.956	763.805	3816.7	4409.5	1673.49	4092.03	4463.53	4482.98	16.673
407.5	680.041	345.434	595.816	2422.39	3593.76	2067.68	1795.34	687.431	758.918	3842.79	4430.6	1687.75	4036.93	4403.55	4433.26	17.5171
408	686.739	349.541	602.99	2384.75	3545.18	2043.17	1774.4	679.47	749.979	3844.62	4423.11	1692.14	3961.85	4325.72	4362.72	18.5798
408.5	692.785	351.783	609.333	2338.14	3482.23	2010.94	1745.15	667.391	737.918	3822.88	4391.49	1685.16	3870.49	4232.34	4276.06	20.1952
409	698.414	352.497	614.67	2284.36	3409.51	1972.79	1709.2	652.314	723.134	3778.62	4339.09	1668.18	3764.68	4127.64	4178.5	22.5568
409.5	703.748	352.45	619.115	2224.94	3330.05	1930.37	1667.76	635.22	706.562	3717.45	4267.16	1643.08	3648.84	4015.1	4074.33	25.7853
410	708.587	352.265	622.762	2162.04	3245.83	1885.66	1623.1	616.802	689.049	3642.07	4181.62	1611.32	3526.62	3898.23	3966.98	29.7841
410.5	712.835	352.509	625.707	2097.03	3158.96	1839.64	1577.13	598.078	671.214	3555.28	4086.13	1575.64	3401.08	3781.01	3858.25	34.1479
411	716.668	353.585	628.165	2031.24	3070.73	1792.96	1531.74	579.731	653.699	3460.81	3983.16	1537.78	3275.37	3666.15	3748.76	38.4373
411.5	720.436	355.669	630.39	1965.69	2982.08	1746.23	1488.36	562.304	636.928	3360.74	3876.28	1498.79	3151.72	3555.75	3638.98	42.2914
412	724.8	358.911	632.809	1901.59	2894.35	1699.91	1448.02	546.135	621.402	3257.2	3767.87	1459.39	3032.44	3450.1	3529.8	45.7364
412.5	730.199	363.107	636	1839.93	2808.84	1654.96	1411.61	531.129	607.388	3152.77	3659.79	1419.8	2918.71	3349	3423.12	49.0304
413	737.38	368.153	640.652	1781.22	2727.72	1611.97	1379.22	517.317	595.073	3049.75	3553.58	1380.6	2811.07	3252.2	3321.1	52.7084
413.5	746.868	374.088	647.488	1725.98	2652.41	1571.75	1350.95	504.493	584.77	2950.5	3450.65	1342.57	2710.62	3159.27	3226.16	57.1796
414	759.03	380.766	656.614	1674.61	2583.74	1535.37	1327.53	492.728	576.634	2856.78	3352.84	1306.65	2617.35	3070.92	3140.62	62.7131
414.5	774.1	388.499	667.79	1627.23	2522.37	1502.83	1308.51	482.416	570.297	2770.48	3260.76	1273.91	2531.04	2988.22	3064.26	69.0419
415	792.117	397.758	680.381	1584.13	2466.99	1474.01	1293.73	473.824	565.619	2692.42	3175.3	1244.08	2452.45	2911.99	2996.33	75.5322
415.5	812.859	408.948	693.674	1545.5	2416.6	1448.6	1283.36	467.327	562.256	2622.11	3098.06	1216.89	2380.47	2843.55	2935.76	81.5171
416	836.422	422.407	707.428	1511.16	2370.49	1425.61	1276.74	463.383	559.967	2559.48	3028.22	1191.69	2314.67	2783.17	2880.9	86.3771
416.5	862.983	438.193	721.57	1480.9	2327.76	1404.32	1273.76	461.928	558.846	2503.35	2966.21	1167.86	2255.07	2730.46	2830.48	89.8791
417	892.922	455.867	736.378	1454.35	2288.07	1384.1	1275.01	462.835	558.917	2452.29	2913.09	1145.58	2200.78	2684.78	2783.26	91.8473
417.5	927.168	474.932	752.329	1430.81	2251.53	1364.58	1280.71	465.959	560.258	2406.41	2867.13	1125.25	2151.61	2644.58	2738.4	92.4155
418	965.999	495.015	769.797	1410.11	2218.07	1345.82	1291.05	470.843	563.187	2365.37	2828.21	1107.28	2107.73	2608.28	2695.37	91.8682
418.5	1009.68	516.058	788.975	1392.1	2187.31	1328.34	1306.94	477.214	567.725	2329.21	2796.07	1092.14	2068.86	2575.42	2654.4	90.3431
419	1058.66	538.714	810.208	1376.73	2159.41	1312.46	1328.1	485.11	573.914	2298.97	2768.8	1079.83	2035.04	2545.76	2616.34	87.9815
419.5	1112.88	563.89	834.016	1364.13	2133.61	1298.75	1354.89	494.556	582.249	2274.25	2745.7	1069.51	2006.64	2519.24	2582.65	84.9341
420	1172.69	592.227	860.588	1353.97	2110.5	1287.3	1388.39	506.057	593.041	2254.67	2726.34	1060.72	1983.23	2496.7	2554.51	81.2612
420.5	1239.47	624.375	891.1	1345.76	2091.06	1277.8	1428.81	520.352	606.707	2240.04	2710.17	1053.36	1964.35	2478.2	2532.19	77.0791
421	1314.05	660.319	926.095	1339.01	2076	1270.26	1476.99	537.711	624.121	2229.6	2698.03	1047.58	1949.77	2463.88	2515.68	72.5308
421.5	1397.34	699.78	966.121	1333.35	2065.92	1264.68	1534.32	558.644	645.534	2223.16	2691.04	1044.1	1938.71	2453.72	2504.22	67.6987
422	1491.31	742.944	1012.42	1328.72	2060.9	1261.13	1600.6	583.216	671.171	2221.51	2689.49	1043.16	1930.85	2447.22	2496.52	62.7001
422.5	1595.95	790.036	1065.21	1325.98	2060.11	1259.77	1676.47	611.111	701.456	2224.84	2694.02	1044.5	1926.34	2444.04	2491.97	57.6529
423	1710.89	841.662	1124.46	1325.67	2062.28	1260.51	1762.66	642.359	736.052	2233.17	2703.79	1047.77	1924.98	2444.5	2490.58	52.7063
423.5	1837.04	899.203	1191	1328.3	2066.56	1262.93	1858.58	677.081	774.888	2246.43	2717.23	1052.19	1926.99	2448.24	2492.69	47.9813
424	1973.98	963.518	1264.39	1334.21	2072.22	1266.35	1965.06	715.56	818.219	2263.04	2733.83	1057.22	1932.61	2455.25	2498.93	43.6434
424.5	2122.39	1035.08	1344.41	1342.86	2079.83	1270.15	2083.03	758.699	865.804	2282.16	2753.09	1062.85	1941.85	2465.6	2509.55	39.9416
425	2283.97	1114.47	1431.63	1353.52	2090.03	1273.97	2211.9	806.66	917.663	2303.67	2775.21	1069.55	1954.74	2478.78	2523.84	36.9564
425.5	2457.65	1200.55	1525.12	1365.53	2103.29	1278.32	2351.35	859.002	973.517	2327.62	2801.42	1077.69	1971.46	2494.34	2540.96	34.6154
426	2642.07	1292.18	1624.04	1378.05	2119.68	1283.94	2499.89	915.359	1032.38	2354.65	2832.68	1087.64	1991.59	2512.3	2559.97	32.8593
426.5	2834.69	1388.39	1727.67	1390.69	2138.65	1291.5	2654.38	974.429	1093.39	2385.82	2868.81	1099.15	2015.05	2532.31	2580.47	31.4453
427	3030.1	1486.75	1833.51	1403.5	2159.39	1301.5	2811.63	1034.78	1155.37	2420.8	2909.67	1111.84	2041.38	2554.61	2602.67	30.1624
427.5	3222.53	1584.78	1938.66	1416.58	2181.37	1313.53	2967.33	1094.93	1216.95	2458.93	2953.34	1125.49	2069.79	2579.72	2626.97	28.8745
428	3403.26	1678.58	2038.97	1430.37	2204.47	1326.83	3116.56	1153.44	1276.53	2498.89	2997.33	1139.94	2099.81	2607.58	2653.64	27.5397
428.5	3566.55	1764.65	2130.42	1445.45	2228.94	1340.46	3253.24	1208.88	1332.21	2538.81	3039.24	1155.04	2131.05	2637.71	2682.67	26.2071
429	3705.97	1839.24	2209.27	1462.32	2255.54	1353.71	3371.81	1258.91	1382.31	2577.29	3077.69	1170.71	2163.42	2669.52	2713.61	24.9548
429.5	3812.89	1896.7	2270.28	1481.28	2284.69	1366.33	3468.15	1301.12	1424.29	2613.26	3112.5	1186.54	2196.89	2702.31	2745.61	23.9181
430	3884.69	1934.78	2311.26	1502.56	2316.19	1378.86	3535.99	1333.3	1455.41	2646.46	3143.62	1201.84	2231.7	2735.59	2778.07	23.1076
430.5	3917.4	1952.88	2330.48	1525.57	2349.28	1392	3573.33	1352.66	1474.37	2676.84	3172.43	1215.67	2267.69	2769.27	2810.57	22.5406
431	3906.26	1948.98	2326.25	1549.54	2382.57	1406.45	3580.95	1358.96	1480.22	2704.26	3199.95	1227.55	2304.73	2803.23	2843.23	22.0919
431.5	3856.03	1926.38	2301.38	1573.45	2414.92	1422.36	3558.03	1353.1	1473.07	2729.32	3226.74	1237.51	2342	2837.72	2876.14	21.7622
432	3770.21	1887.38	2257.97	1596.28	2445.32	1439.57	3509.76	1335.55	1455.38	2752.42	3252.97	1245.69	2378.92	2872.77	2909.36	21.5864
432.5	3654.06	1833.65	2198.41	1617.61	2473.54	1457.65	3441.95	1309.65	1428.64	2773.82	3278.28	1252.72	2415.07	2907.91	2942.67	21.5627
433	3518.67	1770.22	2128.34	1637.39	2499.82	1476.08	3358.79	1278.33	1395.4	2793.98	3301.71	1258.99	2450.33	2942.5	2975.68	21.7693
433.5	3372.72	1700.36	2051.99	1656.54	2524.53	1494.36	3266.93	1243.75	1358.45	2812.5	3322.55	1264.58	2484.91	2975.58	3007.9	22.2147
434	3224.99	1627.24	1973.53	1675.7	2548.57	1512.08	3171.69	1208.17	1319.61	2828.75	3340.68	1269.65	2518.69	3006.62	3039.04	22.875
434.5	3081.7	1554.37	1896.39	1695.19	2572.49	1528.96	3077.34	1172.87	1280.85	2842.53	3355.75	1274.42	2551.84	3035.08	3069.03	23.5993
435	2946.81	1484.32	1823.17	1714.42	2596.66	1544.63	2987.08	1138.86	1243.49	2853.74	3368.59	1279.26	2583.68	3060.58	3097.87	24.2204
435.5	2823.12	1419.89	1756.06	1732.55	2620.96	1558.86	2903.08	1106.75	1208.89	2862.92	3379.81	1284.81	2613.11	3083.7	3125.48	24.5962
436	2711.74	1361.86	1695.92	1748.53	2645.05	1571.21	2828.29	1076.97	1177.98	2871.17	3390.12	1291.39	2639.32	3104.54	3151.63	24.654
436.5	2614.57	1311.12	1643.65	1761.79	2668.1	1581.86	2763.23	1050.48	1150.86	2879.66	3400.42	1299.22	2661.96	3123.6	3175.88	24.4959
437	2533.37	1268.58	1600.18	1772.47	2689.51	1590.8	2708.3	1027.61	1127.95	2889.23	3411.18	1307.58	2680.84	3141.14	3197.6	24.308
437.5	2468.43	1233.62	1565.03	1781.09	2708.49	1597.89	2664.56	1008.8	1109.14	2900.12	3422.89	1315.7	2696.58	3157.38	3216.08	24.2933
438	2420.5	1206.44	1538.36	1788.83	2724	1603.35	2630.2	994.673	1094.07	2912.31	3435.46	1322.61	2709.91	3172.03	3230.98	24.6155
438.5	2388.6	1187.37	1519.5	1795.86	2735.68	1607.09	2603.84	984.818	1083.09	2925.45	3448.76	1328.03	2720.96	3184.51	3242.36	25.2177
439	2370.19	1175.39	1506.98	1801.83	2743.32	1609.05	2585.08	978.784	1076.13	2939.13	3462.42	1332.08	2729.74	3193.65	3250.01	26.0068
439.5	2362.71	1170.24	1500.44	1805.9	2746.57	1609.59	2572.4	976.099	1072.68	2952.86	3475.88	1335.07	2735.41	3198.35	3254.18	26.7374
440	2363.25	1171.16	1499.28	1806.93	2745.88	1608.9	2565.36	975.749	1072.51	2966.07	3488.71	1337.81	2736.54	3198.21	3254.41	27.2685
440.5	2370.13	1176.96	1502.85	1804.19	2741.53	1607.16	2565.01	977.032	1074.67	2978.04	3500.3	1340.48	2732.7	3192.46	3250.25	27.5406
441	2383.14	1186.65	1511.35	1797.59	2733.4	1604.33	2571.07	979.574	1078.12	2987.87	3510.36	1343.32	2723.6	3181.4	3241.19	27.675
441.5	2402.13	1199.35	1524.58	1787.73	2721.88	1599.88	2583.13	982.994	1082.3	2994.95	3518.39	1345.77	2708.89	3165.88	3226.87	27.9178
442	2427	1214.24	1541.3	1775.58	2707.12	1592.97	2600.29	987.257	1086.91	2999.36	3523.55	1347.38	2689.68	3146.68	3207.68	28.427
442.5	2457.47	1231.04	1560.79	1762.18	2689.13	1583.51	2619.78	992.331	1092.19	3001.17	3525.84	1347.84	2666.74	3124.97	3184.9	29.2601
443	2492.01	1249.26	1581.48	1748.12	2668.8	1571.57	2639.12	997.938	1098.42	3000.97	3524.79	1347.29	2640.78	3101.51	3160.2	30.2737
443.5	2528.53	1267.93	1602.15	1733.76	2646.89	1558.05	2655.93	1003.61	1105.43	2999.01	3520.32	1345.94	2612.69	3076.61	3134.93	31.2934
444	2564.76	1286.14	1621.54	1719.21	2624.11	1544.27	2668.91	1008.73	1112.64	2994.91	3513.18	1344.07	2583.22	3050.3	3110.46	32.1199
444.5	2598.25	1302.63	1638.89	1703.98	2601.16	1531.44	2677.91	1012.76	1118.83	2988.52	3503.74	1341.99	2552.86	3022.5	3086.9	32.6903
445	2626.79	1316.57	1653.68	1687.69	2578.09	1520.06	2682.92	1015.31	1122.97	2979.41	3492.69	1339.68	2522.08	2993.3	3063.85	33.0321
445.5	2648.16	1326.86	1665.17	1670.05	2554.66	1509.73	2684.91	1016.16	1124.15	2967.6	3480.62	1336.99	2491.21	2963.17	3040.14	33.2487
446	2661.16	1333.27	1673.19	1651.07	2530.42	1499.52	2683.33	1015.35	1121.91	2953.96	3467.52	1333.73	2460.35	2932.81	3014.7	33.5107
446.5	2664.75	1335.63	1677.54	1631.11	2505.26	1488.43	2676.61	1012.51	1116.58	2939.33	3453.12	1329.78	2429.57	2902.77	2986.94	33.9951
447	2656.94	1333.49	1676.96	1610.91	2479.61	1475.93	2663.2	1007.47	1108.52	2924.07	3437.35	1325.17	2398.62	2873.48	2956.93	34.8318
447.5	2638.4	1326.92	1671.16	1591.41	2454.3	1462.42	2641.26	1000.02	1097.91	2908.25	3419.91	1320.25	2367.23	2844.69	2925.75	36.0572
448	2609.54	1315.75	1659.81	1573.33	2429.7	1448.85	2609.4	989.625	1085.05	2891.69	3401.07	1315.17	2334.93	2815.8	2894.44	37.694
448.5	2570.23	1299.44	1641.97	1556.96	2405.85	1436.05	2568.38	976.052	1069.91	2874.11	3381.28	1309.91	2301.66	2786.11	2863.87	39.638
449	2522.56	1278.42	1618.22	1541.99	2382.04	1424.23	2519.05	959.535	1052.31	2855.74	3360.92	1304.21	2267.22	2755.21	2834.13	41.6736
449.5	2467.72	1253.26	1589.42	1527.59	2357.71	1412.97	2463.09	940.211	1032.57	2836.91	3340.11	1297.56	2231.84	2723.07	2804.7	43.53
450	2406.52	1224.26	1556.28	1512.68	2332.16	1401.59	2402.76	918.614	1010.87	2817.83	3318.74	1289.7	2195.82	2690.19	2774.69	45.0458
450.5	2340.23	1192.53	1520.51	1496.11	2305.58	1389.47	2339.27	895.339	987.492	2798.44	3296.1	1280.53	2159.76	2657.12	2743.26	46.1865
451	2270.03	1158.75	1483.36	1477.58	2278.45	1376.59	2273.57	870.618	962.715	2777.89	3271.56	1270.23	2124.22	2624.1	2710.04	47.0665
451.5	2196.71	1123.36	1445.56	1457.43	2251.73	1363.22	2206.15	844.837	936.619	2755.01	3244.88	1259.41	2089.35	2591.14	2675.5	48.0585
452	2121.46	1086.81	1407.45	1436.43	2226.13	1349.92	2137.03	818.161	909.216	2729.17	3215.8	1248.57	2055.02	2558.11	2640.77	49.4478
452.5	2044.99	1049.41	1368.87	1415.58	2201.55	1336.9	2066.46	790.641	880.875	2700.48	3184.89	1238.12	2020.95	2525.14	2607.4	51.5263
453	1967.79	1011.4	1329.52	1395.75	2177.54	1324.16	1994.88	762.566	852.083	2669.59	3152.82	1227.92	1987.14	2492.8	2576.51	54.1326
453.5	1890.4	973.156	1289.35	1377.72	2153.49	1311.36	1923.02	734.292	823.501	2637.86	3120.12	1217.8	1953.96	2462	2548.71	57.0302
454	1813.03	935.013	1248.63	1361.59	2129.8	1298.48	1851.82	706.382	795.584	2606.34	3087.28	1207.48	1922.25	2433.97	2523.73	59.9695
454.5	1736.16	897.339	1207.84	1347.25	2107.18	1285.96	1782.21	679.4	768.644	2575.64	3054.5	1197	1893.4	2409.27	2501	62.7803
455	1660.09	860.57	1167.69	1334.58	2086.97	1274.68	1715.52	653.812	742.714	2546.03	3021.95	1186.6	1868.57	2388.29	2480.26	65.5184
455.5	1585.62	825.016	1128.7	1323.28	2070.73	1265.38	1652.45	630.092	717.691	2517.45	2990.05	1176.81	1848.37	2371.31	2461.7	68.3526
456	1513.74	791.29	1091.35	1313.24	2059.06	1258.47	1593.42	608.168	693.666	2489.91	2959.32	1167.92	1833.42	2358.05	2446.12	71.4984
456.5	1445.3	759.343	1055.59	1304.86	2051.61	1253.98	1538.76	587.733	670.998	2463.52	2930.73	1159.97	1823.1	2348.61	2434.55	75.025
457	1380.76	729.229	1021.51	1298.02	2047.45	1251.17	1487.77	568.51	649.89	2438.34	2904.44	1152.87	1816.43	2342.91	2427.68	78.9497
457.5	1320.53	700.942	989.34	1292.9	2044.69	1249.3	1439.52	550.071	630.666	2414.16	2880.47	1146.1	1812.52	2340.13	2425.08	83.1673
458	1264.35	674.16	959.112	1289.36	2041.77	1247.97	1393.74	532.307	613.306	2390.3	2858.21	1139.23	1810.15	2338.97	2425.79	87.7109
458.5	1212	648.891	931.158	1286.7	2037.79	1246.81	1349.93	515.495	597.205	2366.02	2836.29	1131.79	1808.28	2337.66	2427.32	92.7401
459	1163.34	625.456	905.707	1284.29	2032.57	1245.84	1308.11	499.837	581.816	2340.59	2813.3	1123.82	1805.67	2334.21	2427.52	98.4155
459.5	1117.67	604.079	882.504	1281.38	2026.71	1245.04	1268.99	485.504	566.357	2313.49	2787.86	1115.36	1801.34	2327.51	2424.93	104.964
460	1075.05	585.135	861.475	1277.64	2020.74	1244.12	1232.44	472.617	550.739	2284.79	2759.75	1106.66	1794.48	2317.21	2419.22	112.632
460.5	1035.4	568.926	842.381	1272.76	2015.19	1242.77	1198.25	460.794	535.15	2254.75	2729.24	1098.17	1784.26	2304.32	2411.18	121.41
461	998.606	555.033	824.826	1266.69	2009.84	1240.65	1165.96	449.663	520.229	2224.05	2697.36	1090.29	1771.09	2289.78	2401.74	131.342
461.5	964.722	543.098	808.802	1259.54	2003.95	1237.9	1134.59	439.022	506.429	2193.28	2665.73	1083.55	1755.53	2274.49	2392.09	142.565
462	933.86	532.756	794.275	1251.35	1996.73	1234.69	1103.5	428.831	494.286	2163.28	2635.76	1078.29	1738.41	2259.06	2382.62	155.199
462.5	906.154	523.684	781.073	1242.11	1987.63	1231.23	1072.76	419.349	483.864	2134.78	2608.7	1074.95	1720.77	2243.31	2373.39	169.636
463	881.587	516.108	769.189	1232.28	1976.82	1227.81	1043.05	411.063	474.943	2108.51	2584.31	1073.95	1703.71	2227.21	2364.13	186.387
463.5	860.276	510.775	758.534	1222.38	1965.03	1224.45	1015.53	404.311	467.524	2084.83	2562.37	1075.33	1688.52	2210.98	2354.88	205.818
464	842.347	508.183	749.051	1213.16	1954.21	1221.21	991.764	399.318	461.322	2063.73	2542.67	1079.22	1676.06	2195.54	2346.33	228.803
464.5	828.369	509.263	741.248	1205.33	1946.58	1218.16	972.288	396.171	456.454	2045.29	2524.78	1086.52	1667.42	2181.79	2339.95	256.562
465	818.646	514.83	735.762	1199.38	1943.45	1215.92	957.251	394.684	453.345	2029.34	2509.17	1097.24	1663.71	2170.52	2337.45	289.586
465.5	813.451	525.226	733.162	1195.57	1945.68	1215.54	946.991	395.14	452.391	2015.99	2496.95	1111.98	1665.25	2162.04	2340.8	329.467
466	813.746	541.586	734.363	1193.74	1953.87	1217.91	940.63	398.301	453.9	2006.08	2488.79	1132.09	1671.84	2156.67	2351.13	377.717
466.5	819.875	565.273	739.604	1194.28	1967.86	1224.09	937.963	404.838	458.302	2000.28	2485.85	1158	1683.66	2154.49	2369.49	435.238
467	832.374	596.934	748.604	1197.51	1987.89	1234.85	939.56	416.068	465.615	1999.24	2489.51	1190.82	1700.7	2156.68	2396.6	504.729
467.5	852.595	638.469	761.456	1203.99	2015.12	1250.46	945.448	433.295	475.836	2004.1	2499.23	1232.65	1723.41	2163.83	2432.31	588.406
468	881.2	690.916	777.828	1214.91	2050.35	1271.23	956.373	456.837	489.249	2014.9	2515.74	1283.53	1753.63	2176.61	2477.31	687.264
468.5	918.871	753.454	797.522	1230.78	2094.88	1297.27	973.514	487.156	505.721	2031.57	2538.8	1344.08	1792.94	2195.74	2532.16	804.117
469	965.367	826.166	820.949	1251.19	2149.59	1328.41	996.263	523.803	525.393	2053.95	2567.04	1414.26	1842.27	2220.38	2596.4	938.177
469.5	1017.85	906.171	847.959	1275.67	2212.78	1364.45	1023.9	564.97	548.423	2080.55	2599.65	1490.34	1901.3	2249.61	2669.23	1085.08
470	1072.21	988.641	877.633	1302.63	2282.11	1404.44	1055.01	608.171	574.049	2109.86	2634.59	1568.11	1966.84	2282.51	2748.46	1238.45
470.5	1121.59	1066.72	908.339	1330.48	2352.58	1446.37	1086.81	649.518	601.015	2140.18	2668.87	1639.26	2034.67	2317.68	2829.57	1385.08
471	1159.26	1132.57	936.693	1357.42	2418.77	1487.51	1116.47	685.113	626.818	2168.92	2699.06	1697.25	2099.19	2353.81	2906.69	1512.27
471.5	1179.01	1180.53	959.537	1381.97	2474.98	1524.46	1140.5	710.325	648.65	2193.9	2721.93	1735.63	2154.64	2389.72	2973.16	1603
472	1174.39	1202.28	972.887	1403.1	2516.35	1554.1	1156.65	721.744	663.378	2212.91	2736.44	1747.16	2196.33	2423.94	3023.79	1647.9
472.5	1146.46	1196.93	974.553	1419.7	2540.64	1573.27	1162.65	718.622	668.521	2225.35	2741.67	1734.6	2221.02	2455.64	3053.6	1645.13
473	1097.69	1167.54	964.329	1432.18	2545.3	1580.86	1157.24	700.322	663.852	2231.45	2739.14	1699.35	2229.12	2483.95	3060.54	1589.89
473.5	1032.66	1116.35	941.895	1441.01	2531.11	1577	1141.57	669.725	649.735	2231.59	2731.95	1645.32	2222.25	2509.29	3045.96	1493.81
474	959.485	1052.45	910.097	1446.56	2501.24	1562.23	1116.15	631.339	628.074	2227.76	2722.15	1581.69	2204.2	2531.95	3011.71	1369.91
474.5	884.756	983.433	872.214	1449.47	2458.07	1539.48	1082.89	589.07	602.083	2221.23	2711.63	1514.56	2179.87	2551.59	2962.8	1229.72
475	814.133	915.467	831.241	1449.67	2406.73	1511.39	1044.93	547.338	574.135	2212.82	2700.64	1450.28	2153.14	2567.47	2904.99	1087.74
475.5	750.158	852.205	790.494	1446.1	2351.96	1480.56	1004.68	508.54	546.343	2203.1	2688.45	1391.97	2126.27	2577.95	2843.58	953.145
476	694.124	794.084	752.182	1438.33	2297.91	1449.39	964.581	474.238	519.638	2192.03	2674.46	1341.2	2099.69	2580.56	2783.69	833.074
476.5	647.03	740.602	718.15	1426.08	2247.72	1419.44	926.327	444.003	494.514	2179.12	2658.66	1298.55	2072.46	2574.85	2728.97	729.139
477	607.805	689.211	688.834	1409.44	2202.56	1391.81	891.155	416.9	470.839	2164.6	2641.53	1261.38	2043.39	2560.93	2681.6	639.492
477.5	575.927	638.62	664.005	1390.13	2163.44	1366.65	859.276	392.726	448.624	2148.37	2624.04	1228.36	2012.09	2539.66	2641.55	563.059
478	550.778	589.386	643.685	1369.7	2129.39	1343.99	830.194	370.953	428.436	2130.26	2606.96	1198.75	1978.72	2514.25	2607.5	496.744
478.5	530.55	542.238	626.938	1349.44	2099.44	1323.65	803.721	351.497	410.489	2110.9	2590.38	1171.58	1944.41	2486.94	2577.9	438.84
479	513.866	498.571	613.137	1330.1	2072.93	1305.06	779.263	334.547	394.81	2090.41	2573.48	1146.87	1910.39	2459.65	2550.58	389.071
479.5	499.314	460.46	601.814	1311.44	2048.57	1287.78	756.568	319.745	381.176	2069	2555.09	1124.68	1877.42	2433.12	2524.06	346.314
480	485.872	427.64	592.103	1292.88	2025.25	1271.52	735.768	306.582	369.199	2046.8	2533.75	1104.52	1845.56	2407.42	2497.53	310.143
480.5	472.907	400.003	583.456	1273.68	2001.98	1255.85	716.608	294.74	358.085	2023.74	2509.19	1086.12	1814.37	2381.89	2470.96	280.496
481	460.277	377.289	575.411	1253.59	1977.46	1240.64	698.544	283.779	347.548	1999.69	2481.83	1068.67	1783.27	2355.74	2444.55	256.207
481.5	447.829	358.072	567.654	1232.73	1951	1225.81	680.608	273.557	337.482	1974.55	2452.09	1051.29	1751.71	2328.25	2418.45	236.467
482	435.627	341.878	560.15	1211.48	1922.14	1211.23	661.942	264.101	328.062	1948.19	2420.86	1033.5	1719.35	2298.71	2392.04	220.727
482.5	423.743	328.739	553.109	1189.96	1891.1	1196.69	642.022	255.209	319.523	1920.58	2388.5	1015.22	1685.44	2266.92	2364.17	208.01
483	412.501	318.231	546.8	1168.12	1858.8	1181.98	620.838	246.489	311.681	1891.93	2354.99	996.688	1649.54	2232.51	2333.26	197.881
483.5	402.343	310.197	541.611	1145.87	1825.96	1166.93	598.924	237.548	304.033	1862.45	2320.61	978.385	1611.06	2195.41	2298.51	190.007
484	393.827	304.47	537.771	1123.21	1793.51	1151.6	577.034	228.089	296.007	1832.36	2285.67	960.754	1569.37	2155.84	2259.67	183.995
484.5	387.146	300.227	535.257	1100.33	1761.85	1136.09	555.918	218.233	287.317	1802	2250.91	944.03	1524.86	2114.12	2217.5	179.786
485	382.323	297.12	533.801	1077.33	1731.21	1120.65	535.946	208.365	278.066	1771.72	2217.2	928.488	1478.53	2070.56	2173.5	177.448
485.5	378.756	294.981	533.047	1054.64	1701.81	1105.43	517.185	199.115	268.75	1742.08	2185.38	914.161	1431.69	2025.76	2129.35	176.865
486	375.644	293.862	532.484	1032.43	1673.7	1090.62	499.656	190.919	260.134	1713.66	2156.16	901.335	1385.72	1980.34	2086.41	178.119
486.5	372.137	294.066	531.773	1010.97	1647.13	1076.4	483.236	184.022	252.827	1687.21	2129.26	890.347	1341.56	1935.37	2045.62	181.275
487	367.921	295.899	530.836	990.617	1622.02	1062.95	467.89	178.191	247.344	1663.43	2104.3	881.084	1300.01	1891.91	2007.49	186.068
487.5	363.372	299.276	529.831	971.928	1598.39	1050.68	453.767	173.113	243.434	1642.41	2080.82	873.363	1261.33	1851.18	1972.42	192.408
488	359.04	303.892	529.194	955.299	1576.53	1039.76	440.775	168.619	240.712	1624.3	2058.1	866.548	1225.59	1814.05	1940.77	199.919
488.5	355.521	309.258	529.345	941.156	1556.54	1030.52	429.027	164.598	238.792	1608.56	2035.8	859.63	1193.36	1780.78	1912.89	208.255
489	353.125	314.791	530.622	929.322	1539.02	1022.96	418.906	161.228	237.428	1594.73	2013.97	851.773	1164.53	1751.73	1889.77	217.31
489.5	351.9	320.344	533.331	919.337	1524.88	1016.86	410.634	158.556	236.599	1582.51	1992.66	842.62	1138.92	1726.42	1871	227.109
490	351.501	325.749	537.442	910.601	1514.24	1012.29	404.631	156.408	236.627	1571.59	1972.3	832.671	1116.17	1704.45	1856.59	237.802
490.5	351.559	330.989	542.98	902.675	1507.3	1009.57	401.47	154.37	237.806	1561.7	1953.41	822.607	1095.44	1685.43	1845.89	249.769
491	351.906	335.765	550.247	895.303	1503.69	1009.05	400.865	151.996	240.35	1552.75	1936.26	813.353	1075.97	1668.8	1838.07	263.137
491.5	352.48	339.68	559.31	888.354	1502.43	1011.13	402.413	149.019	244.288	1544.4	1921.14	805.311	1057.53	1653.95	1832.61	277.656
492	353.321	342.345	570	881.559	1502.55	1015.82	405.534	145.48	249.175	1536.19	1907.99	798.675	1039.92	1640.07	1829.11	292.835
492.5	354.319	343.085	581.991	874.377	1503.25	1022.32	409.14	141.697	254.48	1527.63	1896.04	793.138	1023.15	1626.45	1827.23	307.539
493	355.146	341.707	594.208	866.247	1504.04	1029.48	412.464	138.038	259.504	1518.26	1884.54	788.223	1007.02	1612.3	1826.44	320.626
493.5	355.401	338.054	605.372	856.615	1504.32	1035.8	414.667	134.746	263.566	1507.74	1872.93	783.674	990.533	1597.22	1825.89	330.407
494	354.461	331.974	613.825	845.641	1503.36	1039.87	415.174	131.702	265.993	1495.59	1860.86	779.046	972.596	1580.96	1824.26	335.907
494.5	352.206	323.559	618.362	833.658	1500.09	1040.71	413.336	128.603	266.168	1481.85	1848.48	774.235	952.142	1563.45	1819.88	336.667
495	348.483	312.936	618.512	821.512	1492.83	1037.86	408.147	124.931	263.885	1466.58	1836.02	769.018	929.071	1544.63	1810.93	331.665
495.5	343.594	300.35	613.563	809.693	1480.35	1031.34	399.396	120.508	258.819	1449.83	1823.84	763.371	904.209	1524.71	1796.4	321.581
496	337.679	286.732	604.695	798.441	1462.54	1021.04	386.569	115.418	251.013	1432.38	1812.08	757.421	879.13	1503.97	1776.09	307.433
496.5	330.92	272.979	592.941	787.612	1439.79	1007.58	369.941	109.901	241.055	1415.02	1800.67	751.662	855.658	1482.88	1750.87	289.752
497	323.423	259.988	579.184	777.089	1413.94	991.717	350.669	104.287	229.467	1399	1789.5	746.939	835.135	1462.18	1722.37	270.015
497.5	315.399	248.448	564.629	766.874	1387.37	974.235	329.993	98.7927	217.046	1384.85	1778.68	743.763	818.121	1442.67	1692.21	249.412
498	307.116	238.59	550.101	757.328	1362.25	956.479	309.437	93.5325	204.637	1372.8	1768.66	742.566	804.033	1425.39	1662.14	229.152
498.5	299.033	230.537	536.394	748.798	1340.26	939.383	290.1	88.5332	192.949	1362.85	1759.91	742.976	791.679	1410.58	1633.37	210.141
499	291.625	223.801	523.955	741.725	1321.95	924.091	272.946	83.8105	182.573	1353.9	1753.29	744.357	779.847	1398.36	1606.99	193.037
499.5	285.272	218.032	513.14	735.902	1307.11	910.662	258.262	79.4645	173.629	1345.15	1749.06	745.998	767.834	1388.47	1583.19	178.393
500	280.052	213.09	504.277	731.083	1294.77	898.935	245.92	75.6351	166.221	1335.87	1746.9	747.4	755.821	1380.16	1562.07	166.142
500.5	275.667	208.679	497.245	727.093	1283.81	888.663	235.521	72.3697	160.179	1326.33	1746.38	748.47	744.52	1372.61	1543.68	156.021
501	271.785	204.727	491.966	723.65	1273.88	879.465	226.491	69.7157	155.193	1317.03	1746.67	749.595	734.596	1365.21	1528.09	148.004
501.5	268.068	201.238	488.305	720.677	1264.53	871.424	218.227	67.4671	151.152	1308.86	1747.04	751.207	726.596	1357.75	1515.07	141.804
502	264.569	198.089	485.868	717.892	1255.87	864.688	210.384	65.4025	147.753	1302.34	1747.02	753.445	720.173	1350.42	1504.31	137.33
502.5	261.348	195.312	484.107	714.938	1248.21	859.359	202.765	63.3831	144.812	1297.77	1746.58	756.284	714.677	1343.89	1495.42	134.586
503	258.727	193.029	482.584	711.281	1241.31	855.24	195.499	61.3596	142.213	1294.99	1745.93	759.381	709.254	1338.63	1487.78	133.175
503.5	256.682	191.347	480.878	706.68	1234.89	852.097	189.106	59.4236	140.006	1293.31	1745.38	762.67	703.693	1335.1	1481.29	132.825
504	255.351	190.306	478.854	701.264	1228.57	849.359	184.072	57.7502	138.212	1292.01	1745.15	765.949	698.103	1333.33	1475.39	133.155
504.5	254.701	189.915	476.68	695.889	1222.46	846.739	180.666	56.4529	137.018	1290.48	1745.27	769.251	693.066	1332.85	1470.36	133.731
505	254.696	189.893	474.725	691.633	1216.91	844.321	179.025	55.5847	136.398	1288.29	1745.56	772.319	689.071	1333.1	1466.56	134.348
505.5	255.322	190.043	473.539	689.279	1212.68	842.242	178.547	55.1448	136.227	1285.41	1745.57	774.645	686.33	1333.62	1464.02	134.969
506	256.416	190.228	473.416	688.945	1210.19	840.833	178.486	54.9815	136.184	1282.35	1745	775.645	685.134	1334.2	1462.78	135.706
506.5	257.807	190.486	474.297	690.15	1209.49	840.314	178.116	54.9174	135.958	1279.64	1743.57	774.766	684.847	1335.14	1462.58	136.751
507	258.954	191.006	475.862	691.821	1210.34	840.781	177.104	54.755	135.278	1278.1	1741.54	771.669	685.274	1336.77	1463.33	138.202
507.5	259.523	192.032	477.585	693.17	1211.74	842.133	175.72	54.3892	134.145	1277.97	1739.09	766.955	686.24	1339.11	1464.64	140.069
508	259.415	193.735	479.079	693.927	1213.03	844.2	174.686	53.7981	132.979	1279.11	1736.44	761.502	688.081	1342.08	1466.65	142.368
508.5	258.989	196.077	480.277	694.268	1213.89	846.649	174.75	53.1069	132.329	1280.71	1733.68	756.347	690.857	1345.37	1469.82	145.12
509	258.937	198.883	481.604	694.6	1214.7	849.22	176.367	52.536	132.852	1282	1730.82	752.282	694.738	1349.01	1474.59	148.379
509.5	259.911	201.786	483.635	695.193	1215.96	851.709	179.745	52.3599	134.572	1282.53	1727.77	749.44	699.591	1353.01	1481.51	152.341
510	262.388	204.743	486.914	696.158	1218.16	854.102	184.312	52.8514	137.28	1282.59	1724.72	747.551	705.165	1357.66	1490.34	157.194
510.5	266.177	207.78	491.732	697.328	1221.39	856.628	189.44	54.0092	140.571	1282.94	1722.03	745.879	711.282	1363.02	1500.72	162.983
511	270.667	211.138	497.847	698.555	1225.62	859.761	194.581	55.7457	143.984	1284.45	1720.2	743.852	717.376	1368.66	1511.78	169.823
511.5	275.104	215.113	505.01	699.74	1230.92	863.93	199.561	57.8467	147.294	1287.74	1719.5	741.25	723.094	1373.78	1522.76	177.893
512	278.967	220.059	512.823	701.057	1237.3	869.598	204.668	60.0352	150.646	1292.64	1719.98	738.365	727.775	1377.31	1533.01	187.322
512.5	282.386	226.243	521.091	702.638	1245.17	877.033	210.668	62.0947	154.403	1298.38	1721.83	735.969	730.85	1378.59	1542.3	198.613
513	285.654	233.795	529.992	704.613	1255.08	886.167	218.226	63.9517	159.033	1303.83	1724.65	734.988	731.862	1377.72	1551.16	212.23
513.5	289.456	242.772	539.826	707.003	1267.28	896.957	227.812	65.7187	164.978	1308.48	1728.41	736.074	730.502	1375.76	1560.33	228.379
514	294.21	252.942	550.945	709.891	1281.9	909.325	239.767	67.6508	172.421	1312.62	1733.26	739.705	727.537	1374.12	1571.06	247.508
514.5	300.133	264.262	563.757	713.313	1298.91	923.174	253.582	70.0676	181.386	1317.21	1739.07	745.771	724.113	1374.03	1584.28	269.28
515	306.988	276.128	578.393	717.432	1317.85	938.498	268.956	73.2057	191.911	1322.95	1745.65	753.344	721.522	1375.97	1600.88	293.032
515.5	314.4	287.841	594.468	722.101	1338.31	955.117	285.509	77.109	203.763	1330.02	1752.22	761.534	720.725	1379.57	1620.91	317.931
516	322.041	298.415	611.453	727.016	1359.69	972.279	302.597	81.5621	216.477	1338.02	1758.03	769.488	721.966	1383.76	1643.2	342.72
516.5	329.512	307.156	628.064	731.599	1381.13	989.049	319.546	86.1053	229.297	1345.73	1762.41	776.864	724.746	1387.47	1666.22	366.308
517	336.386	313.585	643.284	735.336	1401.32	1004.22	335.186	90.1913	241.172	1352.15	1765.26	783.622	727.867	1389.68	1687.76	387.25
517.5	342.108	317.273	655.683	737.865	1418.65	1016.82	348.4	93.2936	251.035	1356.5	1767.43	790.053	729.732	1390.18	1705.76	404.644
518	346.28	318.567	664.327	738.78	1431.9	1025.81	357.787	95.2073	257.744	1359.03	1769.99	796.299	729.088	1389.18	1718.44	417.777
518.5	348.637	317.798	668.757	738.182	1439.63	1030.83	362.032	95.8574	260.947	1360.22	1774.17	802.339	725.562	1387.19	1724.86	425.193
519	349.156	315.03	668.33	736.165	1441.23	1031.81	361.099	95.5139	260.443	1360.36	1780.19	808.026	719.774	1384.8	1725.16	426.936
519.5	348.173	310.525	663.567	732.927	1437.12	1028.65	355.023	94.5362	256.607	1359.75	1787.73	813.369	713.052	1382.11	1719.63	423.141
520	345.987	304.41	655.161	728.725	1427.57	1021.9	344.533	93.1021	250.325	1358.1	1795.5	818.584	706.877	1378.82	1709.03	413.429
520.5	342.936	296.588	643.584	724.026	1413.87	1012.07	331.126	91.3461	242.213	1354.9	1802.19	824.067	702.582	1374.49	1694.35	399.07
521	339.1	287.654	630.008	719.482	1397.47	999.549	315.885	89.2483	232.866	1350.13	1806.88	830.292	700.321	1368.89	1676.09	381.303
521.5	334.442	278.28	615.437	715.72	1379.57	985.158	299.654	86.7839	222.803	1344.3	1809.64	837.418	699.326	1362.21	1655.1	361.249
522	329.021	269.514	600.826	713.117	1361.38	969.663	283.108	84.0956	212.365	1338.33	1811.36	845.074	698.262	1355.36	1632.49	340.66
522.5	323.218	261.897	587.118	711.718	1343.63	953.777	266.823	81.4987	201.997	1333.26	1813.11	852.196	696.226	1349.43	1609.56	320.975
523	317.556	255.663	574.697	711.204	1327.06	938.363	251.452	79.3044	192.173	1329.78	1815.79	857.728	693.146	1345.62	1588.01	303.536
523.5	312.54	250.97	563.844	711.076	1312.09	924.014	237.63	77.7511	183.388	1328.26	1819.71	861.308	689.852	1343.97	1568.85	288.891
524	308.61	247.358	554.239	710.912	1299.19	911.574	226.105	76.7792	176.107	1328.25	1824.64	863.309	687.662	1343.97	1553.02	277.194
524.5	305.83	244.669	545.675	710.644	1289.16	901.232	217.208	76.3188	170.301	1329.07	1829.78	864.399	687.605	1344.37	1540.47	268.492
525	304.085	242.915	538.081	710.443	1282.32	893.162	210.681	76.1145	165.952	1330.02	1834.21	865.758	690.191	1344.01	1530.85	261.931
525.5	303.031	242.256	531.553	710.686	1278.61	887.316	206.179	76.1161	162.645	1330.62	1837.22	868.01	694.764	1342.26	1523.78	256.954
526	302.642	242.82	526.275	711.498	1277.69	883.198	202.863	76.4364	159.979	1330.93	1838.84	871.377	700.133	1339.36	1518.81	253.188
526.5	303.102	244.837	522.575	712.925	1278.3	880.406	200.064	77.2121	157.796	1331.33	1839.71	875.293	705.156	1336.5	1515.75	250.394
527	304.903	247.973	520.267	714.956	1279.24	878.553	197.517	78.552	155.99	1332.53	1840.83	879.12	709.285	1335.08	1514.87	248.739
527.5	308.294	251.99	519.115	717.351	1279.82	877.339	195.304	80.4672	154.652	1335.01	1842.97	882.223	712.833	1336.13	1515.82	248.649
528	313.344	256.713	518.671	720.18	1279.79	876.694	193.72	82.8408	153.944	1339.04	1846.3	884.646	716.54	1339.24	1518.3	250.306
528.5	319.491	261.753	518.501	723.568	1279.69	876.819	193.215	85.495	153.954	1344	1850.44	886.722	721.239	1343.74	1521.99	253.789
529	326.198	266.983	518.536	727.638	1280.36	877.644	193.795	88.4704	154.489	1349.34	1854.53	888.968	727.142	1348.57	1526.6	258.94
529.5	332.908	272.311	518.921	732.227	1282.46	879.229	195.205	91.7742	155.344	1354.43	1857.96	891.816	734.25	1353.25	1531.95	265.292
530	339.17	277.754	519.889	737.087	1286.12	881.454	197.091	95.5835	156.255	1358.97	1860.54	895.142	742.081	1357.59	1538.01	272.573
530.5	345.032	283.446	521.474	741.842	1291.35	884.165	199.075	100.054	157.161	1363.03	1863.01	898.859	750.399	1362.03	1544.95	280.918
531	350.723	289.757	523.536	746.366	1298.11	887.172	201.071	105.159	158.173	1367.02	1866.35	902.657	759.639	1367.24	1552.82	290.497
531.5	356.787	296.923	525.759	750.837	1306.43	890.352	203.348	110.781	159.588	1371.65	1871.81	906.577	770.128	1373.56	1561.69	301.715
532	363.662	305.267	528.02	755.712	1316.76	893.702	206.317	116.888	161.619	1377.46	1879.6	911.089	782.604	1381.05	1571.41	314.905
532.5	371.686	314.996	530.342	761.576	1328.84	897.308	210.414	123.504	164.509	1384.93	1889.53	916.98	797.845	1389.31	1582.35	329.946
533	381.048	325.962	532.917	768.893	1342.35	901.583	216.052	130.76	168.251	1394.08	1901.27	925.235	815.976	1398.27	1595.03	346.928
533.5	391.883	338.15	536.017	777.688	1356.82	906.49	223.128	139	172.767	1405.14	1914.16	936.95	836.641	1408.02	1610.11	366.021
534	404.335	351.789	539.673	787.865	1371.51	912.319	231.341	148.317	178.054	1417.98	1928.39	952.355	859.394	1418.74	1627.84	387.561
534.5	418.534	367.113	543.717	799.069	1386.57	919.142	240.53	158.902	183.945	1432.47	1944.59	971.532	883.513	1430.98	1648.12	412.549
535	434.685	384.867	547.884	810.885	1402.7	926.947	250.197	170.943	190.401	1448.32	1962.9	994.408	908.455	1445.01	1670.09	442.1
535.5	453.107	405.942	552.271	823.19	1420.84	935.637	260.206	184.387	197.304	1465.23	1983.15	1020	934.331	1460.75	1692.9	476.601
536	474.039	430.54	557.069	835.87	1441.64	945.066	270.348	199.425	204.437	1482.8	2004.65	1047.69	961.517	1477.84	1716.07	516.694
536.5	498.17	459.107	562.862	848.907	1464.98	955.157	280.462	216.264	211.55	1501.16	2026.03	1077.67	990.765	1495.76	1739.61	562.421
537	525.611	491.601	569.829	861.915	1489.76	965.748	290.35	234.901	218.53	1520.48	2046.38	1109.84	1022.99	1514.04	1764.4	612.837
537.5	556.253	527.483	577.725	874.754	1514.67	976.586	299.918	255.464	225.499	1541.02	2065.6	1144.68	1058.61	1532.48	1791.52	668.113
538	590.078	566.983	585.959	887.364	1539.12	987.343	309.458	278.076	232.741	1563.04	2084.66	1183.34	1097.6	1550.98	1821.5	728.239
538.5	626.305	610.067	593.783	900.169	1563.16	997.826	319.474	302.657	240.683	1586.36	2104.93	1225.73	1139.99	1569.83	1854.29	793.082
539	664.248	656.289	600.85	913.873	1588.1	1008.11	330.854	329.268	249.543	1610.65	2128.04	1271.98	1185.28	1589.77	1889.27	863.147
539.5	703.355	705.594	607.269	929.303	1615.45	1018.81	343.992	357.976	259.387	1635.31	2154.33	1322.05	1233.47	1611.64	1925.81	938.068
540	743.426	757.352	613.937	947.568	1646.12	1030.72	359.193	388.554	270.096	1659.89	2183.98	1375.08	1285.1	1636.35	1963.88	1016.98
540.5	784.75	810.885	621.7	969.029	1680.84	1044.91	376.382	420.957	281.547	1684.32	2216.52	1430.95	1340.69	1664.93	2004.45	1099.88
541	828.509	866.252	631.43	993.769	1719.96	1062.13	395.132	455.091	293.967	1709.34	2251.3	1490.49	1401.26	1698.17	2049.12	1186.74
541.5	876.096	923.967	643.079	1022.22	1763.78	1083.06	415.292	490.969	307.948	1736.16	2288.9	1554.27	1468.55	1736.52	2100.4	1278.32
542	929.123	985.192	656.266	1054.62	1813.44	1107.61	437.594	529.632	324.065	1766.59	2330.74	1624.14	1544.19	1781.31	2160.55	1377.62
542.5	989.937	1052.75	670.525	1091.65	1870.75	1135.36	462.919	572.539	342.887	1803.42	2377.98	1703.26	1630.51	1832.7	2230.78	1487.41
543	1058.52	1128.76	685.535	1135	1937.11	1166.4	492.802	621.282	364.812	1847.85	2432.76	1792.31	1730.17	1891.49	2312.38	1609.66
543.5	1134.2	1214.24	701.151	1185.32	2014.4	1200.44	528.372	677.938	389.258	1900.7	2496.12	1892.42	1843.8	1959.6	2405.23	1747.3
544	1214.29	1309.06	717.541	1242.5	2101.61	1237.53	569.379	742.104	415.561	1962.45	2566.82	2002.19	1971.41	2036.3	2507.59	1897.33
544.5	1292.92	1407.39	734.4	1305.75	2195.39	1277.65	614.836	810.714	442.454	2030.34	2643.7	2114.47	2109.37	2120.26	2616.62	2051.55
545	1362.73	1501.2	750.814	1371.18	2290.8	1319.56	662.535	878.325	468.673	2101.09	2723.11	2220.28	2249.6	2208.15	2726.96	2196.2
545.5	1412.79	1576.49	765.179	1434.36	2380.76	1361.44	709.594	936.877	492.724	2170.52	2801.04	2305.18	2380.61	2294.18	2831.96	2313.53
546	1436.65	1622.31	775.722	1488.97	2458.15	1399.95	752.806	979.039	512.849	2234.66	2872.77	2359.98	2488.49	2371.63	2922.37	2386.62
546.5	1428.93	1630.52	781.386	1530.11	2513.92	1431.81	789.137	995.819	527.687	2290.91	2934.23	2373.63	2561.65	2431.31	2989.66	2393.15
547	1385.25	1589	781.04	1553.78	2542.63	1453.72	816.499	984.08	535.125	2336.86	2983.6	2339.97	2588.21	2468.33	3027.22	2328
547.5	1312.6	1505.55	775.328	1555.29	2542.19	1461.78	832.426	945.479	534.15	2372.92	3017.49	2266.92	2564.04	2479.01	3028.84	2194.6
548	1218.31	1388.81	765.36	1536.51	2510	1455.79	836.058	881.755	525.235	2399.24	3036.04	2160.83	2493.66	2460.27	2995.56	1999.91
548.5	1111.93	1248.38	752.207	1499.75	2451.64	1436.16	828.205	801.937	508.877	2414.54	3040.22	2035.2	2382.68	2417.06	2932.36	1769
549	1005.01	1102.36	737.412	1447.99	2374.5	1404.34	809.393	714.702	487.106	2418.88	3028.02	1904.31	2245.01	2354.23	2845.83	1525.76
549.5	905.781	962.178	722.096	1388.46	2286.1	1365.01	782.525	627.838	462.643	2410.4	3001.83	1778.39	2095.45	2278.6	2746.81	1292.76
550	820.058	839.527	707.267	1327.14	2195.98	1322.33	751.415	547.748	437.702	2387.21	2963.37	1664.77	1947.28	2198.9	2645.02	1085.15
550.5	748.192	735.606	693.609	1269.08	2110.87	1280.55	719.144	477.43	414.11	2351.4	2913.26	1563.95	1810.33	2121.36	2548.64	909.962
551	689.752	651.024	681.673	1217.56	2036.67	1242.92	688.331	419.891	392.875	2304.55	2855.4	1476.31	1689.48	2051.47	2463.55	770.044
551.5	643.555	585.587	672.106	1174.1	1974.31	1211.39	660.379	373.354	374.718	2249.7	2793.39	1400.61	1588.83	1991.6	2392	658.926
552	606.541	533.07	664.712	1139.7	1923.13	1186.82	636.189	336.129	359.558	2192.11	2730.89	1333.83	1507.35	1943.14	2334.47	570.313
552.5	577.059	491.165	658.99	1112.92	1882.94	1167.91	615.392	307.524	346.83	2135.4	2671.22	1276.44	1443.17	1906.55	2288.87	500.373
553	553.927	458.804	654.298	1092.82	1851.16	1153.78	597.401	285.146	336.283	2083.21	2616.52	1227.87	1395.82	1879.64	2252.83	444.112
553.5	535.39	432.882	649.804	1078.36	1826.04	1143.69	581.853	267.448	327.336	2037.22	2568.98	1187.34	1361.9	1860.63	2224.2	399.123
554	520.653	412.265	644.95	1067.64	1806.62	1136.33	568.029	253.591	319.491	1998.65	2528.17	1154.72	1338.11	1847.22	2200.01	363.553
554.5	509.009	396.188	639.72	1059.19	1790.31	1130.94	555.402	242.315	312.564	1967.6	2493.61	1128.04	1321.74	1836.76	2178.25	334.602
555	499.818	383.085	634.407	1051.45	1775.26	1126.63	543.625	232.897	306.378	1942.5	2465.02	1105.88	1308.52	1826.81	2157.01	310.653
555.5	492.742	372.361	629.628	1043.23	1759.49	1122.38	532.214	225.005	300.844	1922.14	2440.4	1087.13	1295.18	1815.43	2134.96	290.56
556	487.617	363.766	625.993	1033.66	1741.54	1117.24	520.896	218.104	295.922	1904.95	2418.26	1070.57	1279.12	1801.71	2111.34	273.331
556.5	484.218	356.789	623.769	1022.5	1720.86	1110.38	509.517	211.842	291.305	1889.07	2397.16	1055.54	1259	1785.36	2085.99	258.784
557	482.542	351.353	623.14	1009.96	1697.41	1101.52	498.083	205.938	286.724	1873.35	2375.81	1041.69	1234.95	1766.84	2059.34	246.71
557.5	482.284	347.363	623.852	996.398	1672.49	1090.71	486.676	200.114	281.921	1856.83	2353.74	1028.69	1207.4	1746.93	2032.18	236.522
558	483.13	344.446	625.5	982.096	1647.25	1078.44	475.392	194.403	276.966	1839.39	2331.21	1016.26	1178.35	1726.26	2005.72	227.805
558.5	485.006	342.503	627.671	967.091	1622.92	1065.53	464.379	189.015	272.151	1820.86	2308.8	1004.45	1149.04	1705.13	1980.76	220.157
559	487.786	341.374	629.938	951.729	1600.2	1052.79	453.785	184.28	267.909	1801.31	2287.1	993.032	1120.69	1683.66	1957.77	213.343
559.5	491.295	340.93	631.892	936.461	1579.42	1041.07	444.051	180.395	264.507	1780.83	2266.39	981.978	1094.03	1662.2	1936.5	207.554
560	495.325	341.206	633.36	922.133	1560.87	1030.76	435.37	177.428	261.839	1759.42	2246.35	971.294	1069.55	1641.3	1916.3	202.898
560.5	499.69	342.234	634.304	909.584	1544.51	1022.1	428.015	175.147	259.621	1737.32	2226.58	961.021	1047.77	1621.8	1896.66	199.349
561	504.165	343.846	635.081	899.334	1530.33	1014.96	422.219	173.186	257.458	1714.87	2206.5	951.382	1028.51	1604.47	1877.41	196.835
561.5	508.593	345.902	636.133	891.314	1518.28	1008.9	417.642	171.288	255.282	1692.9	2186.15	942.593	1011.78	1589.6	1859.21	195.17
562	513.023	348.143	637.924	884.885	1507.85	1003.64	414.038	169.313	253.331	1672.32	2165.86	934.728	997.524	1576.94	1843.11	194.146
562.5	517.722	350.337	640.551	879.175	1498.69	998.918	411.22	167.446	252.058	1654.07	2146.55	927.77	985.688	1566.22	1830.33	193.766
563	523.035	352.535	643.902	873.589	1490.63	994.753	409.132	166.065	251.784	1639.01	2128.92	921.891	976.085	1557.1	1821.3	194.201
563.5	529.143	355.07	647.573	868.184	1483.57	991.412	408.159	165.632	252.706	1627.22	2113.65	916.951	969.007	1549.6	1815.75	195.484
564	536.123	358.411	651.191	863.723	1478.11	989.141	409.004	166.731	254.537	1618.11	2101.39	913.28	964.37	1544.43	1812.87	197.888
564.5	544.312	363.208	654.677	861.04	1475.01	988.28	412.195	169.694	256.925	1611.15	2091.8	911.546	962.481	1542.17	1811.47	201.487
565	553.77	369.834	658.271	861.183	1474.83	988.741	417.931	174.447	259.629	1605.09	2084.93	912.171	963.852	1543.01	1811.17	206.445
565.5	564.907	378.36	662.441	863.741	1477.82	990.252	426.007	180.825	262.571	1599.58	2080.79	915.807	968.398	1546.87	1812.1	213.357
566	578.64	388.951	667.735	867.983	1483.64	992.274	435.568	188.326	265.951	1595.19	2079.16	922.564	975.969	1552.67	1814.91	222.413
566.5	595.569	401.419	674.346	873.229	1491.47	994.697	446.078	196.45	270.063	1592.95	2080.55	931.846	986.16	1559.55	1820.49	233.772
567	616.039	415.795	682.117	878.868	1500.52	997.425	457.269	205.035	275.065	1593.95	2085.01	943.201	998.167	1566.74	1828.85	247.795
567.5	640.271	432.67	690.817	884.969	1510.12	1000.68	469.172	214.302	281.107	1599.32	2092.25	956.107	1011.22	1573.72	1839.28	264.052
568	667.198	452.123	700.11	891.866	1519.97	1004.96	482.293	224.61	288.035	1608.52	2102.2	970.085	1024.61	1580.19	1850.68	281.966
568.5	696.012	474.035	710.033	900.01	1529.98	1010.43	497.189	236.466	295.702	1620.46	2114.4	985.137	1037.87	1585.88	1861.96	301.042
569	726.14	498.106	720.879	909.268	1540.06	1017.02	514.113	249.734	304.095	1633.86	2128.12	1000.85	1051.12	1590.9	1872.43	320.286
569.5	757.59	523.067	732.848	919.083	1549.91	1024.02	533.294	263.886	313.282	1647.38	2143.09	1016.67	1064.57	1595.5	1881.62	338.636
570	790.88	547.807	746.151	928.382	1559.12	1030.66	554.832	278.143	323.246	1660.58	2158.86	1031.5	1078.37	1600.51	1889.49	354.527
570.5	827.105	571.039	761.183	936.317	1567.3	1036.19	578.851	291.758	334.085	1673.68	2174.96	1043.98	1092.14	1606.54	1895.84	366.742
571	866.746	592.638	778.235	942.41	1574.36	1040.23	606.093	304.495	346.065	1687.13	2190.79	1053.3	1105.09	1614.15	1900.67	374.372
571.5	910.181	613.105	798.053	946.742	1580.39	1043.03	637.488	316.617	359.369	1701.32	2205.81	1058.73	1116.24	1623.12	1904.18	376.524
572	958.206	633.327	821.977	949.953	1585.86	1045.21	674.031	329.052	374.615	1716.31	2219.76	1060.42	1124.27	1632.8	1907.09	373.901
572.5	1011.53	655.222	850.89	952.773	1591.25	1047.58	717.684	342.765	392.428	1731.55	2232.72	1059.27	1129.17	1642.12	1910.28	367.299
573	1072.97	680.509	886.087	956.179	1596.89	1050.8	770.258	358.998	413.292	1746.75	2245.62	1055.99	1131.74	1650.45	1914.72	357.354
573.5	1147.95	711.532	929.086	960.785	1603	1055.2	833.489	378.362	438.121	1762.02	2259.57	1051.39	1133.97	1658.24	1921.01	344.869
574	1240.66	749.779	980.389	966.968	1609.72	1060.85	911.071	401.492	467.983	1777.95	2275.79	1046.38	1137.8	1666.75	1929.1	330.073
574.5	1356.77	797.327	1042	974.972	1617.5	1067.36	1005.85	430.025	503.381	1795.41	2294.56	1041.44	1144.72	1677.67	1939.14	312.775
575	1503.69	858.078	1117.26	984.638	1626.91	1074.46	1120.49	465.436	546.198	1815.41	2315.79	1037.1	1155.68	1691.83	1951.03	293.431
575.5	1682.72	933.155	1208.46	995.902	1638.61	1081.93	1260.5	509.097	598.427	1838.54	2339.79	1033.94	1170.25	1709.46	1965.68	272.868
576	1895.9	1024.48	1318.63	1007.91	1653.34	1089.53	1426.13	563.644	660.377	1865.26	2366.64	1032.75	1187.49	1729.96	1983.27	252.584
576.5	2142.24	1133.49	1448.71	1020.16	1670.71	1097.04	1614.98	628.775	733.048	1895.89	2396.86	1033.74	1206.36	1751.87	2003.99	233.91
577	2410.79	1255.86	1593.48	1032.01	1689.57	1104.18	1822.41	702.629	814.118	1929.79	2431.46	1037.05	1225.68	1773.67	2026.72	217.666
577.5	2685.19	1385.08	1744.9	1042.65	1707.8	1110.56	2034.55	781.604	898.794	1966.01	2469.43	1042.44	1244.08	1793.71	2048.63	204.119
578	2939.64	1509.76	1888.62	1051.43	1722.91	1115.82	2234.82	858.426	979.76	2002.39	2508.56	1048.97	1259.76	1810.54	2066.63	192.2
578.5	3146.14	1616.1	2009.79	1057.42	1732.8	1119.56	2398.85	925.141	1048.08	2035.66	2544.49	1055.44	1270.76	1822.53	2077.48	181.122
579	3274.98	1689.67	2090.69	1060.36	1735.68	1121.61	2508.89	971.529	1096.33	2062.05	2572.86	1060.48	1275.7	1828.27	2080.26	169.796
579.5	3304.08	1717.21	2119.91	1059.71	1732.02	1121.75	2553.13	992.403	1115.79	2078.03	2590.19	1063.24	1273.03	1827.72	2075.28	158.395
580	3233.83	1696.65	2097.61	1055.65	1723.46	1119.76	2518.6	985.05	1105.54	2082.82	2593.38	1062.77	1264.16	1821.94	2064.67	147.416
580.5	3075.23	1629.95	2024.57	1049.3	1712.17	1116.1	2419.59	949.144	1069.36	2076.1	2585.38	1059.08	1251.42	1813.43	2051.82	137.693
581	2856.27	1527.33	1915.39	1042.16	1701.34	1111.21	2273.84	892.999	1012.39	2060.56	2569.58	1052.85	1238.09	1805.75	2039.89	129.753
581.5	2615.21	1406.85	1788.82	1036.08	1693.07	1106.1	2102.58	825.612	945.514	2040.5	2550.26	1044.77	1227.88	1802.54	2031.66	123.731
582	2387.52	1285.43	1662.58	1032.48	1689.16	1102.03	1934.99	757.098	878.632	2019.86	2531.83	1035.79	1223.43	1806.05	2028.86	119.492
582.5	2198.36	1178.55	1552.65	1032.52	1689.81	1100.28	1789.87	696.402	820.635	2002.17	2516.51	1026.99	1226.8	1816.69	2032.85	116.223
583	2059.35	1095.59	1467.57	1036.46	1694.97	1101.85	1684.1	649.764	776.547	1989.23	2506.22	1019.29	1237.83	1833.81	2044.9	113.549
583.5	1976.75	1042.6	1415.26	1043.91	1704.79	1106.84	1619.8	620.927	748.699	1982.68	2500.8	1013.67	1256.03	1856.04	2064.64	111.164
584	1947.23	1019	1394.09	1054.53	1718.74	1115.33	1596.52	608.371	738.687	1982.97	2500.86	1010.65	1281	1881.71	2091.45	109.032
584.5	1964.37	1020.96	1399.11	1067.64	1736.85	1126.63	1615.07	610.984	743.879	1990.1	2507.65	1010.78	1310.91	1909.66	2123.2	107.129
585	2024.86	1046.78	1429.22	1082.56	1759.01	1139.92	1665.97	626.966	762.137	2004.92	2520.73	1014.21	1343.62	1938.59	2157.2	105.344
585.5	2120.46	1091.98	1478.75	1098.59	1784.06	1154.35	1743.28	653.087	791.858	2026.45	2540.43	1020.24	1376.65	1967	2190.45	103.472
586	2242.91	1151.69	1543.03	1114.98	1810.22	1169	1842.19	687.482	829.691	2053.25	2566.49	1028.37	1407.25	1993.45	2220.45	101.373
586.5	2385.76	1222.07	1619.19	1131.04	1835.28	1182.95	1954.22	727.96	873.104	2083.66	2596.74	1037.71	1433.36	2016.38	2245.82	99.1018
587	2540.66	1298.26	1702.38	1145.88	1857.01	1195	2074.17	772.362	919.868	2115.01	2629.55	1047.67	1453.69	2034.9	2265.83	96.9235
587.5	2702.1	1376.96	1789.19	1158.95	1874.22	1204.53	2198.29	819.479	968.196	2145.36	2663.02	1058.02	1468.58	2047.9	2280.51	95.2438
588	2867.22	1456.67	1877.61	1169.84	1886.49	1211.21	2323.65	868.222	1017.38	2173.34	2695.38	1068.73	1479.09	2055.82	2290.39	94.2228
588.5	3033.66	1537.07	1966.31	1178.13	1894.88	1215.56	2448.57	917.622	1067.13	2198.93	2725.47	1079.81	1486.06	2059.34	2296.03	93.824
589	3198.14	1617.77	2054.18	1183.9	1900.47	1218.35	2570.19	966.396	1116.78	2222.66	2752.53	1091.03	1490.77	2058.96	2298.17	93.8387
589.5	3352.25	1696.69	2138.66	1187.47	1904.43	1220.47	2684.18	1012.49	1164.52	2244.83	2776.84	1101.83	1493.73	2055.92	2298.01	93.8394
590	3484.57	1768.65	2214.97	1189.32	1907.68	1222.35	2782.67	1053.34	1206.78	2265.44	2798.14	1111.4	1495.3	2051.34	2296.69	93.5636
590.5	3580.8	1826.72	2276.36	1190.38	1910.47	1224.12	2854.33	1084.82	1239.64	2283.37	2816.24	1118.77	1496.06	2046.71	2295.59	92.8722
591	3621.86	1859.35	2311.52	1191.5	1913.08	1225.73	2891.91	1103.54	1257.98	2296.33	2830.77	1123.49	1496.57	2043.37	2295.78	91.9976
591.5	3600.84	1861.02	2313.96	1193.29	1915.91	1226.98	2886.82	1107.35	1257.45	2303.54	2840.28	1125.71	1497.45	2042.32	2297.82	91.1504
592	3514.15	1827.77	2278.82	1196.01	1919.64	1228.13	2834.01	1092.57	1237.86	2304.75	2843.76	1125.66	1499.12	2044.13	2301.53	90.5366
592.5	3359.16	1756.92	2201.61	1199.6	1924.69	1229.57	2737.13	1059.85	1198.65	2300.32	2841.65	1124.15	1501.8	2048.36	2306.45	90.1876
593	3150.84	1657.62	2091.95	1203.82	1930.96	1231.9	2599.44	1011.37	1143.03	2292.77	2834.44	1121.99	1505.65	2054.28	2312.14	89.9428
593.5	2903.62	1537.52	1958.96	1208.32	1938	1235.13	2429.91	948.59	1076.56	2284.16	2824.32	1119.74	1510.7	2061.14	2318.77	89.6259
594	2633.43	1404.36	1812.8	1212.8	1944.95	1238.99	2241.62	876.533	1003.35	2276.29	2813.92	1117.76	1517.21	2068.53	2326.37	89.1215
594.5	2360.38	1268.23	1665.34	1217.18	1951.32	1243.1	2046.44	800.339	927.842	2269.99	2805.62	1116.14	1525.24	2076.58	2335.42	88.4817
595	2099.77	1136.41	1525.08	1221.32	1957.24	1247.16	1857.13	725.106	853.829	2265.31	2800.92	1115.05	1534.62	2085.99	2345.74	87.8219
595.5	1866.41	1016.25	1399.15	1225.32	1963.6	1251.3	1682.94	655.579	784.464	2262.19	2800.05	1114.62	1545.26	2097.09	2357.3	87.2671
596	1665.71	910.878	1289.85	1229.37	1971.44	1256.01	1532.06	594.409	722.531	2260.41	2803.28	1115.09	1556.76	2109.85	2369.67	86.8271
596.5	1500.3	822.262	1198.69	1233.8	1981.5	1261.7	1406.97	544.072	668.973	2260.31	2809.67	1116.65	1568.91	2123.51	2382.74	86.4145
597	1371.46	752.128	1126.06	1238.83	1993.44	1268.5	1305.98	503.676	625.276	2262.67	2818.38	1119.28	1581.39	2136.77	2395.95	85.8843
597.5	1271.47	697.145	1068.52	1244.43	2005.98	1275.98	1228.01	471.618	591.316	2267.6	2828.86	1122.82	1593.71	2148.18	2408.62	85.1658
598	1195.23	654.939	1024.16	1250.15	2016.96	1283.15	1167.88	446.953	565.212	2275.18	2840.36	1127.02	1604.74	2156.31	2419.53	84.3392
598.5	1138.45	623.486	990.632	1255.06	2024.55	1288.86	1120.81	427.336	545.703	2285.01	2852.19	1131.45	1612.67	2160.64	2427.13	83.6758
599	1095.42	599.369	964.805	1257.75	2027.55	1291.93	1084.17	411.364	530.732	2295.96	2863.99	1135.91	1615.54	2160.81	2429.64	83.4528
599.5	1063.44	580.995	945.549	1257.35	2025.27	1291.98	1054.87	398.468	518.471	2307.24	2875.78	1140.3	1612.24	2156.49	2426.06	83.8969
600	1041.58	567.744	932.289	1253.61	2018.43	1289	1031.19	387.972	508.459	2318.42	2887.94	1144.79	1601.98	2147.82	2416.89	84.8704
600.5	1029.12	558.987	924.568	1246.98	2008.24	1283.29	1013.78	379.711	500.718	2329.92	2901.25	1149.54	1586.82	2135.09	2403.41	86.1337
601	1027.04	555.28	923.144	1238.79	1996.08	1276.11	1003.43	374.28	495.847	2342.65	2916.29	1154.82	1569.15	2119.21	2388.22	87.2391
601.5	1037.68	557.935	928.969	1230.7	1983.9	1268.6	1001.89	372.09	495.385	2358.05	2933.75	1160.67	1551.83	2102.43	2373.62	87.8927
602	1062.33	567.658	942.071	1224.38	1973.64	1262.08	1013.31	373.883	500.076	2377.29	2954.96	1167.4	1537.35	2087.75	2361.76	88.0962
602.5	1104.12	586.15	964.221	1221.21	1967.83	1257.78	1039.8	381.216	510.402	2401.69	2980.64	1175.58	1527.61	2078.83	2354.25	88.0842
603	1166.31	615.251	997.005	1222.19	1968.68	1256.79	1083.53	394.934	527.765	2432.08	3011.88	1185.81	1525.15	2078.38	2353.21	88.2043
603.5	1250.06	655.298	1041.17	1228.33	1977.82	1260.4	1148.96	416.097	552.632	2468.19	3050.53	1198.99	1531.38	2088.54	2361.3	88.6055
604	1356.52	707.076	1098.81	1240.16	1997.4	1268.83	1235.2	446.252	585.396	2510.1	3096.08	1215.65	1547.94	2110.37	2381.14	89.3005
604.5	1483.87	770.067	1168.77	1258.42	2027.02	1282.77	1341	484.821	626.907	2557.06	3147.92	1235.36	1578.11	2143.25	2415.08	89.9855
605	1625.42	841.265	1247.33	1284.04	2066.39	1302.71	1464.84	530.905	675.815	2607.45	3204.69	1257.44	1622.7	2187.41	2464.41	90.2835
605.5	1770.42	916.026	1328.92	1317.13	2115.85	1328.36	1597.98	582.38	729.44	2659.58	3263.03	1280.66	1682.11	2243.68	2527.63	89.9691
606	1903.54	986.932	1404.68	1358.48	2174.31	1359.84	1730.83	634.958	783.758	2710.79	3319.8	1303.35	1757.78	2312.15	2602.94	89.12
606.5	2008.41	1045.43	1466.16	1408	2241.62	1396.79	1849.3	683.949	833.464	2758.26	3370.9	1324.03	1847.44	2394.12	2688.37	88.0586
607	2067.22	1081.97	1502.57	1464.5	2317.93	1438.24	1941.68	723.841	873.499	2798.01	3413.72	1341.32	1948.96	2488.91	2781.4	87.1002
607.5	2069.85	1090.04	1509.28	1526.46	2401.46	1483.12	1998.78	751.301	898.685	2827.28	3445.41	1354.6	2060.19	2593.52	2880.85	86.5153
608	2016.19	1069	1486.53	1591.02	2489.52	1529.71	2011.07	763.68	907.852	2844.7	3461.94	1362.76	2176.33	2703.46	2984.89	86.3396
608.5	1910.78	1020.39	1434.98	1654.56	2577.83	1575.71	1984.14	760.551	901.62	2848.39	3464.36	1365.18	2291.99	2811.83	3089.91	86.4042
609	1773.4	953.057	1364.28	1712.72	2660.47	1618.53	1926.18	744.996	882.047	2839.66	3452.84	1362.21	2399.58	2911.61	3190.37	86.4535
609.5	1624.85	877.888	1285.06	1761.71	2731.37	1655.47	1847.83	720.134	854.127	2820.96	3428.4	1353.79	2491.83	2994.82	3278.43	86.3228
610	1484.98	805.226	1207.78	1798.72	2783.84	1684.23	1763.29	690.133	822.16	2793.69	3395.64	1341.05	2562.25	3056.04	3347.1	86.1121
610.5	1367.89	743.438	1141.62	1820.22	2814.59	1702.11	1682.02	659.067	790.039	2760.56	3357.22	1325.62	2603.63	3092.09	3388.62	86.0074
611	1280.17	695.877	1091.25	1825.3	2821.54	1707.8	1611.1	629.712	760.411	2723.64	3316.01	1308.92	2614.92	3098.74	3400.33	86.2779
611.5	1225.77	664.864	1059.6	1814.2	2804.43	1701.64	1552.57	603.829	734.692	2684.22	3274.44	1292.42	2596.63	3077.63	3383.77	86.9052
612	1199.47	648.353	1044.32	1786.76	2766.78	1683.58	1506.56	581.969	713.608	2644.54	3233.98	1277.06	2550.42	3032.35	3340.96	87.7516
612.5	1195.52	644.007	1042.01	1746.29	2711.93	1656.13	1472.31	564.641	696.944	2606.15	3195.88	1263.56	2483.97	2966.06	3277.17	88.5586
613	1208.73	650.22	1050.08	1696.58	2645.1	1622.07	1446.52	551.54	684.446	2571.23	3160.83	1252.31	2403.42	2886.36	3199.18	89.1272
613.5	1230.78	662.988	1063.65	1641.72	2572.61	1584.41	1426.25	541.746	675.363	2540.42	3130.06	1243.19	2315.1	2799.96	3112.94	89.4201
614	1254.18	678.381	1078.56	1586.64	2499.9	1546.6	1407.59	534.204	668.009	2514.07	3104.47	1236.2	2225.34	2713.12	3025.59	89.4957
614.5	1270.05	691.397	1089.97	1535.19	2431.75	1511.18	1386.04	526.931	660.494	2492.55	3083.89	1230.71	2138.74	2631.43	2943.03	89.594
615	1271.12	697.362	1093.44	1490.72	2371.19	1480.01	1357.3	517.96	650.532	2474.78	3068.73	1225.94	2059.12	2558.69	2870.32	89.7762
615.5	1252.17	692.887	1085.72	1454.38	2320.49	1453.38	1318.03	505.174	636.674	2460.27	3058.42	1221.45	1988.71	2498.92	2809.95	90.0478
616	1208.92	674.957	1064.01	1426.18	2279.91	1431.11	1268.14	487.659	617.919	2449.06	3051.96	1216.97	1930.32	2452.53	2762.15	90.2982
616.5	1145.46	645.594	1030.5	1406.44	2248.6	1413.51	1208.93	465.797	594.491	2441.37	3049.06	1212.91	1885.68	2419.15	2727.03	90.5101
617	1067.44	607.747	988.441	1393.26	2226.69	1400.07	1144.2	440.542	568.063	2437.8	3049.49	1210.07	1854.7	2398.85	2702.46	90.7988
617.5	982.382	565.065	942.511	1385.56	2213.41	1391.17	1078.76	414.163	540.452	2439.66	3052.71	1209.18	1837.29	2388.2	2687.09	91.3433
618	898.954	522.342	897.952	1383.09	2207.99	1387.71	1017.11	388.691	513.944	2446.66	3059.15	1210.67	1831.89	2385.27	2680.63	92.3486
618.5	823.212	482.658	858.066	1384.72	2210.33	1389.36	962.719	365.975	490.139	2458.77	3068.88	1214.57	1835.73	2389.08	2682.47	93.8637
619	759.584	448.513	824.777	1389.95	2219.14	1395.6	916.682	346.945	470.461	2475.22	3081.85	1220.16	1847.05	2398.58	2691.97	95.6689
619.5	707.936	420.123	797.172	1398.65	2232.97	1405.34	880.033	331.703	455.492	2494.21	3098.69	1226.83	1864.22	2413.9	2708.42	97.3353
620	667.481	397.458	774.388	1410.16	2250.79	1416.74	852.294	320.672	444.755	2514.33	3118.68	1234.38	1886.22	2435.39	2730.27	98.4583
620.5	637.089	380.471	755.513	1423.9	2270.68	1428.55	832.391	312.993	437.997	2534.48	3141.02	1242.77	1913.15	2461.61	2755.82	98.9579
621	613.813	367.66	739.729	1439.68	2291.53	1440.25	820.011	308.086	434.226	2554.1	3164.63	1252.25	1944.01	2490.79	2783.83	99.1301
621.5	595.636	358.243	727.196	1456.57	2312.63	1451.72	813.668	305.547	432.28	2573.23	3188.2	1262.9	1977.38	2520.76	2813.03	99.4547
622	581.171	351.388	718.214	1474.25	2333.46	1463.27	811.669	304.573	431.594	2592.38	3210.56	1274.19	2011.29	2549.24	2842.33	100.31
622.5	569.013	346.022	712.144	1492.02	2353.69	1474.9	812.68	304.543	431.668	2611.76	3230.75	1285.43	2043.22	2574.99	2870.44	101.946
623	558.788	341.552	708.419	1509.25	2373.03	1486.31	814.886	305.115	432.233	2631.15	3248.55	1295.67	2071.29	2597.09	2895.87	104.263
623.5	550.597	337.717	706.129	1524.77	2391.13	1496.86	817.073	306.058	433.144	2649.68	3263.87	1304.48	2093.43	2615.99	2917.24	106.894
624	544.375	334.692	704.497	1537.3	2407.58	1505.72	818.342	307.249	434.274	2665.95	3276.02	1311.56	2109.5	2631.34	2933.38	109.459
624.5	540.017	332.65	703.249	1546.19	2421.56	1512.72	818.522	308.622	435.309	2678.32	3284.78	1316.88	2119.92	2642.63	2944.27	111.754
625	537.064	331.842	702.437	1551.37	2432.65	1517.81	817.75	309.772	435.938	2685.08	3289.79	1320.67	2124.89	2649.61	2950.7	113.804
625.5	534.528	331.986	702.221	1553.38	2440.6	1521.24	816.251	310.377	436.016	2686.02	3290.06	1322.69	2126.14	2652.24	2953.75	115.724
626	531.693	332.692	702.743	1553.73	2445.08	1523.65	814.423	310.003	435.687	2681.04	3285.85	1322.44	2125.05	2651.02	2955	117.719
626.5	528.173	333.519	703.841	1553.8	2447.31	1525.52	812.553	308.719	435.298	2670.86	3277.2	1319.7	2122.9	2647.22	2955.67	119.929
627	524.372	334.053	705.126	1554.6	2448.49	1527.38	810.98	306.768	435.177	2657.23	3263.67	1314.15	2121.02	2642.68	2956.66	122.481
627.5	520.932	334.334	706.295	1556.48	2450.26	1529.68	810.004	304.687	435.733	2641.5	3246.05	1305.91	2120.48	2639.05	2958.74	125.39
628	518.519	334.522	707.065	1559.14	2453.7	1532.98	809.908	303.121	437.145	2624.91	3224.66	1295.93	2122.44	2637.73	2962.5	128.662
628.5	517.413	334.854	707.44	1562.23	2459.17	1537.64	811.02	302.462	439.26	2607.99	3200.2	1285	2127.1	2639.44	2968.7	132.339
629	517.329	335.489	707.382	1565.48	2466.09	1543.48	812.941	302.856	441.679	2590.48	3174.11	1274.21	2134.16	2644.23	2977.09	136.384
629.5	517.579	336.305	706.958	1568.79	2472.47	1549.64	814.907	303.912	443.872	2571.38	3147.26	1264.14	2142.45	2651.16	2986.96	140.642
630	517.379	337.131	706.116	1571.46	2475.68	1554.58	815.334	305.132	445.292	2549.61	3119.41	1255.07	2149.31	2658.2	2995.96	144.847
630.5	516.18	337.692	704.573	1572.01	2472.23	1556.2	812.516	305.652	445.099	2523.38	3089.56	1246.52	2151.51	2661.89	3000.55	148.668
631	513.806	337.86	702.277	1567.59	2460.03	1552.05	804.785	304.665	442.354	2491.76	3055.57	1237.52	2144.12	2658.19	2996.29	151.791
631.5	510.262	337.581	699.216	1555.03	2436.73	1540.34	789.849	301.177	436.468	2454.26	3014.09	1226.63	2123.93	2642.14	2978.87	153.876
632	505.517	336.831	695.51	1532	2400.29	1520.52	767.588	294.389	427.034	2409.67	2964.52	1212.62	2088.22	2610.2	2946.26	154.898
632.5	499.683	335.609	691.552	1496.86	2351	1492.28	738.025	284.176	413.809	2358.07	2906.44	1194.88	2034.29	2561.59	2896.95	155.046
633	492.779	333.898	687.734	1450.77	2289.83	1456.91	701.535	270.631	397.489	2299.88	2841.03	1173.03	1963.92	2495.85	2831.56	154.568
633.5	484.815	331.602	684.394	1396.9	2218.61	1416.51	660.554	254.378	378.972	2235.28	2771.82	1148	1879.66	2416.43	2753.13	153.909
634	476.073	328.807	681.434	1338.63	2141.07	1373.07	617.285	236.571	359.232	2166.44	2701.24	1121.34	1784.65	2327.88	2664.55	153.454
634.5	466.997	325.611	678.704	1280.05	2060.86	1329.17	574.304	218.176	339.452	2095.82	2631.57	1094.61	1684.16	2234.47	2570.23	153.512
635	458.245	322.091	675.916	1224	1981.76	1286.68	533.364	200.134	320.478	2026.42	2563.79	1069.05	1583.14	2140.92	2474.59	154.302
635.5	450.324	318.443	673.036	1172.75	1906.93	1247.55	495.759	182.979	303.004	1960.92	2498.73	1045.41	1486.23	2050.73	2382.03	155.814
636	443.63	314.868	670.175	1126.83	1838.66	1212.54	461.877	167.084	287.241	1900.89	2437.35	1024.14	1396.56	1967.37	2296.35	158.193
636.5	438.424	311.784	667.764	1086.21	1778.45	1181.92	430.945	152.655	273.351	1847.87	2380.46	1005.2	1316.12	1892.38	2219.98	161.313
637	434.473	309.438	666.201	1050.98	1726.25	1155.92	402.17	139.737	261.456	1800.94	2329.97	988.46	1245.94	1826.36	2154.57	165.095
637.5	431.419	308.161	665.567	1020.45	1682.26	1133.75	374.933	128.651	251.312	1759.42	2287.4	974.287	1184.82	1770.07	2099.71	169.481
638	428.7	308.224	665.638	994.033	1645.58	1114.93	349.549	119.411	242.917	1723.48	2252.15	962.613	1131.88	1721.85	2053.77	174.176
638.5	425.837	309.577	665.78	971.782	1614.76	1099.17	326.766	111.933	236.189	1692.28	2223.95	953.212	1086.16	1680.24	2015.56	179.019
639	422.573	311.924	665.585	952.961	1589.03	1086.01	307.958	106.223	230.946	1665.82	2200.88	945.662	1046.7	1644.78	1983.64	183.965
639.5	419.037	314.914	664.999	937.145	1567.37	1075.25	293.494	101.92	227.255	1644.41	2180.58	939.078	1013.19	1614.16	1957.1	189.136
640	415.621	318.036	664.601	924.334	1549.27	1067	283.594	98.5966	224.95	1626.94	2162.04	932.95	985.371	1588.38	1935.94	194.835
640.5	412.889	321.023	665.201	913.95	1535.18	1060.89	277.666	95.9069	223.735	1612.47	2144.95	927.22	962.184	1568.06	1919.5	201.503
641	411.511	323.79	667.711	905.621	1525.35	1056.71	274.381	93.4664	223.334	1600.26	2129.48	922.447	943.18	1552.57	1907.1	209.282
641.5	411.795	326.405	672.229	898.957	1519.65	1054.6	273.078	91.0933	223.562	1589.62	2116.54	919.209	927.371	1540.98	1897.89	218.247
642	413.728	329.012	678.491	893.34	1517.99	1054.33	273.227	88.9061	224.227	1580.57	2106.23	918.032	913.801	1531.91	1891.25	228.464
642.5	416.881	331.599	686.119	888.194	1519.25	1056.16	274.748	87.1658	225.597	1573.82	2098.3	918.281	902.172	1523.69	1887.23	239.954
643	420.6	334.115	694.735	883.134	1522.44	1060.71	278.019	86.2056	228.09	1569.36	2092.37	918.962	892.189	1515.31	1886.76	252.988
643.5	424.283	336.353	704.569	877.868	1527.35	1067.99	283.365	86.3963	232.217	1567.26	2087.55	918.756	883.653	1506.69	1890.88	268.204
644	427.591	338.181	716.273	872.549	1534	1078.19	290.955	87.6067	238.575	1566.97	2083.11	916.944	876.323	1498.29	1899.96	285.885
644.5	430.632	339.638	730.124	867.76	1543.26	1091.51	301.217	89.5284	247.353	1567.61	2078.59	913.537	869.861	1490.98	1914.44	306.356
645	433.913	340.958	746.367	863.954	1556.57	1107.6	314.288	91.672	258.253	1568.17	2073.98	909.094	863.937	1485.41	1933.32	329.711
645.5	438.162	342.491	764.57	861.624	1574.52	1126.34	330.168	93.7154	271.052	1568.04	2069.19	904.718	858.366	1481.53	1955.84	355.5
646	443.945	344.385	784.052	860.819	1596.98	1147.58	349.223	95.5086	285.208	1567.18	2064.23	900.996	853.185	1478.87	1981.82	383.485
646.5	451.409	346.601	804.265	860.948	1623.57	1171.05	370.983	97.2635	300.204	1565.95	2058.81	898.046	848.343	1476.81	2010.9	413.39
647	460.251	348.883	825.047	860.955	1652.35	1196.19	394.661	99.2314	315.738	1564.92	2052.84	895.379	843.873	1474.81	2043.2	444.736
647.5	469.767	350.769	846.286	859.696	1681.61	1222.12	419.121	101.642	331.384	1564.46	2045.96	892.546	839.502	1472.58	2078.02	476.823
648	479.01	351.873	867.67	856.607	1709.45	1247.29	442.734	104.446	346.673	1564.62	2038.39	889.48	835.053	1470.03	2113.61	508.299
648.5	487.1	351.965	888.305	851.89	1734.12	1270.05	463.942	107.178	360.76	1564.94	2030.59	886.484	830.411	1467.06	2146.99	537.272
649	493.208	351.132	906.675	846.447	1754.3	1288.39	480.492	109.325	372.683	1564.54	2023.47	884.111	825.667	1463.56	2174.51	561.279
649.5	496.849	349.541	920.489	841.681	1767.89	1300.92	491.28	110.28	381.369	1562.7	2017.81	882.713	821.063	1459.48	2193.21	577.87
650	497.715	347.236	927.784	838.588	1774.56	1306.44	495.464	109.983	385.418	1559	2013.97	882.054	816.796	1454.89	2200.82	586.072
650.5	495.594	344.3	927.934	837.462	1773.46	1304.13	491.724	108.4	384.453	1553.6	2011.92	881.654	812.984	1450.07	2196.19	584.65
651	490.871	340.559	920.366	837.415	1763.8	1294.82	481.199	105.751	378.505	1547.42	2010.5	880.592	809.391	1445.14	2180.52	574.102
651.5	484.057	335.885	906.286	837.282	1746.83	1279.23	464.931	102.408	367.825	1541.56	2008.54	878.581	805.786	1440.18	2155.68	556.159
652	475.62	330.52	887.622	835.885	1723.79	1258.79	443.675	98.6587	353.75	1536.8	2004.8	875.6	801.798	1434.8	2123.9	531.699
652.5	466.193	324.729	865.817	832.728	1696.4	1235.59	419.383	94.6689	337.585	1533.19	1999.18	872.185	797.498	1428.58	2088.17	502.749
653	456.062	319.052	842.636	828.079	1667.26	1211.17	393.338	90.6152	320.542	1530.13	1992.17	868.862	793.017	1421.09	2050.94	471.127
653.5	445.363	313.768	819.3	822.833	1638.18	1186.95	366.571	86.5076	303.583	1526.62	1984.88	865.812	788.821	1412.48	2013.99	438.202
654	434.144	308.915	796.736	818.101	1610.56	1163.48	340.134	82.3551	287.295	1522.08	1978.67	863.036	785.087	1403.21	1978.68	405.359
654.5	422.768	304.232	775.593	814.488	1584.98	1141.33	314.727	78.1682	272.043	1516.52	1974.37	860.22	781.967	1393.99	1945.54	373.702
655	411.894	299.303	756.137	812.093	1561.25	1120.42	291.182	74.0066	257.946	1510.75	1972.41	857.249	779.327	1385.37	1915.06	344.383
655.5	402.107	293.857	738.581	810.504	1538.98	1100.66	269.867	70.0387	245.067	1505.72	1971.88	854.197	776.842	1377.61	1887.23	317.868
656	393.892	287.914	722.785	809.102	1517.64	1082.11	251.016	66.4344	233.565	1502.04	1971.94	851.297	774.177	1370.64	1862.29	294.279
656.5	387.237	281.87	708.372	807.429	1497.46	1064.88	234.919	63.4393	223.315	1499.54	1971.76	848.732	770.817	1364.33	1840.32	273.953
657	381.891	276.387	695.215	805.325	1478.89	1049.33	220.995	61.1493	214.241	1497.27	1971.07	846.464	766.69	1358.57	1821.29	256.578
657.5	377.059	272.048	683.175	802.993	1462.38	1035.75	208.978	59.44	206.143	1494.22	1970.09	844.242	761.692	1353.45	1805.29	241.705
658	372.343	269.109	672.239	800.729	1448.39	1024.33	198.718	58.0959	198.774	1489.77	1969.4	841.764	756.162	1349.18	1792.11	229.251
658.5	367.69	267.701	662.699	798.715	1436.93	1015.05	189.785	56.8347	192.127	1484.12	1969.29	838.896	750.508	1346.02	1781.31	218.637
659	363.553	267.276	654.443	797.17	1427.35	1007.92	181.981	55.4813	186.29	1478.4	1969.68	835.742	745.278	1343.97	1772.51	209.353
659.5	360.437	267.236	647.487	795.993	1419.14	1002.37	175.156	54.0421	181.395	1473.74	1969.78	832.498	741.021	1343.01	1765.22	201.131
660	358.598	266.893	641.808	795.158	1411.77	997.911	169.095	52.6181	177.664	1471.08	1968.86	829.392	738.036	1342.75	1758.72	193.424
660.5	357.727	265.816	637.207	794.651	1405.04	994.071	163.625	51.3483	175.008	1469.91	1966.34	826.502	736.548	1342.82	1752.42	186.004
661	357.217	263.888	633.495	794.432	1398.88	990.554	158.678	50.2555	173.05	1469.28	1962.31	823.995	736.359	1342.76	1745.71	178.832
661.5	356.556	261.115	630.622	794.377	1393.24	987.24	154.05	49.187	171.227	1468.02	1957.63	821.895	737.155	1342.09	1738.27	171.972
662	355.491	257.877	628.317	794.195	1387.92	984.321	149.755	47.9401	169.153	1465.52	1953.13	820.426	738.388	1340.49	1730.18	165.675
662.5	354.289	254.502	626.338	793.717	1382.83	981.822	145.629	46.3685	166.6	1462.17	1949.54	819.768	739.294	1337.86	1722.05	160.292
663	353.3	251.31	624.482	792.944	1377.74	979.729	141.53	44.5063	163.719	1459.02	1946.74	819.883	739.332	1334.79	1714.85	155.953
663.5	352.754	248.583	622.594	792.137	1372.78	977.975	137.309	42.5551	160.94	1457.31	1944.46	820.472	738.228	1331.97	1709.62	152.578
664	352.424	246.484	620.656	791.794	1368.3	976.41	133.058	40.8207	158.691	1457.51	1942.34	820.95	736.2	1330.07	1706.78	149.973
664.5	351.649	245.116	618.778	792.225	1364.67	974.991	129.04	39.4858	157.257	1459.27	1940.49	820.79	733.798	1329.31	1705.94	147.634
665	349.914	244.314	617.075	793.426	1362.02	973.632	125.607	38.5963	156.289	1461.39	1939.52	819.774	731.775	1329.34	1706.16	145.206
665.5	346.979	243.827	615.636	794.889	1360.32	972.319	122.982	38.0426	155.357	1462.69	1940.06	818.237	730.692	1329.49	1706.07	142.468
666	343.161	243.397	614.365	795.963	1359.26	970.876	121.063	37.744	153.963	1462.47	1942.2	816.817	730.607	1329.04	1704.71	139.516
666.5	339.181	242.661	613.09	796.111	1358.52	969.018	119.571	37.5083	151.974	1460.95	1945.61	816.082	731.049	1327.88	1701.66	136.521
667	335.796	241.575	611.639	795.245	1357.9	966.59	118.108	37.2292	149.603	1458.9	1949.11	816.307	731.346	1326.42	1697.51	133.76
667.5	333.494	240.319	609.987	793.76	1357.23	963.657	116.418	36.7882	147.325	1457.28	1951.69	817.182	730.937	1325.36	1693.24	131.316
668	332.135	239.132	608.288	792.197	1356.45	960.62	114.529	36.1818	145.688	1456.5	1952.59	818.249	729.863	1325.14	1689.98	129.273
668.5	331.332	238.26	606.773	790.913	1355.4	957.99	112.63	35.4678	144.917	1456.41	1952.11	818.946	728.643	1325.76	1688.12	127.562
669	330.563	237.725	605.646	789.881	1353.99	956.184	110.915	34.7112	144.997	1456.29	1950.98	819.007	728.029	1326.41	1687.73	126.114
669.5	329.569	237.461	604.995	788.832	1352.13	955.472	109.46	34.1021	145.546	1455.48	1949.93	818.393	728.436	1326.38	1688.27	124.921
670	328.39	237.153	604.734	787.39	1349.73	955.521	107.98	33.7781	146.153	1453.69	1949.24	817.305	729.659	1325.21	1689	124.027
670.5	327.414	236.61	604.549	785.602	1347.02	956.093	106.195	33.7511	146.466	1451.28	1948.63	816.054	731.168	1323.19	1689.4	123.456
671	327.064	235.875	603.997	783.848	1344.25	956.856	103.839	33.7966	146.337	1449.15	1947.46	814.687	732.049	1321.08	1689.25	123.115
671.5	327.463	235.085	602.749	782.834	1342.02	957.878	101.128	33.5604	145.748	1448.12	1945.45	813.414	731.911	1319.71	1689.29	122.903
672	328.471	234.407	600.754	782.899	1340.71	959.149	98.4235	32.7869	144.765	1448.78	1942.9	812.264	730.698	1319.77	1689.89	122.616
672.5	329.508	233.808	598.378	784.085	1340.73	960.603	96.1369	31.4072	143.411	1451.02	1940.75	811.472	729.181	1321.09	1691.83	122.098
673	330.1	233.227	596.184	785.952	1342.31	961.99	94.4637	29.5758	141.752	1454.22	1940.03	811.027	728.051	1323.28	1695.12	121.243
673.5	329.906	232.518	594.692	787.817	1345.16	962.833	93.2239	27.6953	139.925	1457.64	1941.24	810.899	727.835	1325.58	1699.49	120.098
674	329.035	231.563	594.131	789.147	1348.7	962.853	92.058	26.1704	138.148	1460.35	1944.35	810.926	728.456	1327.68	1704.12	118.775
674.5	327.866	230.574	594.383	789.748	1352.26	961.955	90.5906	25.2631	136.683	1462.03	1948.08	810.777	729.436	1329.28	1707.94	117.422
675	326.811	229.78	595.06	789.901	1355.28	960.615	88.7747	24.8654	135.716	1462.48	1951.17	810.373	730.268	1330.39	1710.38	116.208
675.5	326.109	229.41	595.692	790.017	1357.59	959.304	86.8538	24.7303	135.352	1462.13	1952.38	809.848	730.491	1330.69	1711.08	115.294
676	325.681	229.419	596.075	790.401	1359.33	958.488	85.1406	24.6017	135.506	1461.31	1951.62	809.61	730.223	1329.94	1710.66	114.822
676.5	325.234	229.557	596.555	791.192	1360.71	958.222	83.841	24.366	136.072	1460.37	1949.29	810.107	729.759	1327.92	1709.83	114.857
677	324.505	229.572	597.487	792.279	1361.93	958.347	83.0425	24.0175	136.913	1459.55	1946.13	811.633	729.712	1325	1709.45	115.501
677.5	323.506	229.098	599.228	793.451	1362.78	958.644	82.6058	23.6468	137.894	1458.85	1943.2	814.193	730.386	1321.96	1709.67	116.701
678	322.57	228.106	601.31	794.524	1362.99	959.105	82.4419	23.2763	138.927	1458.22	1941.16	817.157	731.924	1319.9	1710.07	118.223
678.5	322.173	226.65	603.171	795.477	1362.42	959.917	82.5606	22.9058	139.778	1457.46	1940.78	819.906	733.931	1319.84	1710.13	119.732
679	322.554	225.01	604.034	796.442	1361.42	961.357	82.9724	22.4785	140.274	1456.79	1941.95	821.792	735.821	1322.15	1709.75	120.826
679.5	323.648	223.406	603.771	797.567	1360.78	963.334	83.6022	22.0648	140.144	1456.47	1944.67	822.624	736.791	1326.21	1709.46	121.227
680	325.037	222.045	602.721	798.862	1361.34	965.557	84.132	21.8373	139.451	1456.87	1948.71	822.372	736.344	1330.41	1710.34	120.778
680.5	326.002	221.072	601.664	800.125	1363.59	967.52	84.2322	22.0064	138.454	1458.06	1953.32	821.323	734.461	1333.11	1713.39	119.676
681	326.081	220.578	601.262	800.865	1367.22	968.993	83.6407	22.6255	137.652	1459.84	1957.87	819.919	731.716	1333.09	1718.83	118.394
681.5	325.078	220.486	601.806	800.653	1371.26	970.067	82.4571	23.5308	137.445	1461.69	1961.58	818.436	729.216	1330.34	1725.66	117.451
682	323.383	220.601	603.067	799.297	1374.31	970.896	81.1203	24.3888	137.925	1462.86	1964.14	817.173	728.076	1326.04	1732.04	117.132
682.5	321.487	220.57	604.407	797.242	1375.35	971.943	80.2321	24.8116	138.876	1463.01	1965.41	816.254	729.024	1322.07	1736.29	117.422
683	319.958	220.145	605.331	795.324	1373.93	973.215	80.1908	24.5716	139.795	1462.21	1965.51	815.894	731.925	1320.39	1737.52	118.062
683.5	319.27	219.226	605.577	794.503	1370.5	974.702	80.8336	23.6915	140.277	1461.02	1964.92	816.097	735.869	1321.57	1736.3	118.635
684	319.504	218.041	605.494	795.413	1366.21	976.088	81.6516	22.4975	140.136	1460.04	1963.91	816.899	739.668	1325.09	1734.08	118.844
684.5	320.574	216.979	605.404	797.8	1362.44	977.355	82.0072	21.3477	139.629	1459.64	1962.69	818.192	742.299	1329.32	1732.55	118.594
685	322.038	216.43	605.667	800.735	1360.28	978.679	81.6295	20.4851	139.134	1459.77	1961.42	819.669	743.385	1332.72	1732.7	118.141
685.5	323.547	216.544	606.185	802.83	1360.07	980.092	80.6402	19.9304	138.991	1459.97	1960.31	820.96	743.193	1334.55	1734.45	117.783
686	324.637	217.09	606.867	803.326	1361.72	981.704	79.5582	19.5465	139.204	1459.82	1959.55	821.78	742.395	1334.95	1737.09	117.767
686.5	325.066	217.732	607.447	802.244	1364.51	983.321	78.8599	19.2071	139.581	1459.13	1959.34	822.095	741.759	1335.3	1739.77	118.131
687	324.687	217.936	607.878	800.514	1367.68	984.747	78.7657	18.8542	139.802	1458.18	1959.79	821.976	741.633	1336.66	1742.14	118.722
687.5	323.752	217.585	608.111	799.244	1370.75	985.83	79.0474	18.5924	139.779	1457.36	1960.84	821.631	742.079	1339.62	1744.43	119.393
688	322.644	216.763	608.215	799.158	1373.82	986.662	79.3092	18.5683	139.672	1457.21	1962.21	821.231	742.778	1343.4	1746.99	120.013
688.5	321.996	215.978	608.329	800.201	1377.25	987.646	79.2293	18.8326	139.808	1457.55	1963.65	820.857	743.548	1346.77	1750.14	120.69
689	322.125	215.603	608.56	801.549	1381.16	988.881	78.8534	19.2887	140.4	1458.08	1965.17	820.427	744.275	1348.74	1753.52	121.567
689.5	323.141	215.878	609.243	802.433	1385.29	990.209	78.5068	19.7183	141.385	1458.33	1966.76	820.019	745.107	1348.85	1756.8	122.757
690	324.722	216.623	610.464	802.534	1388.78	991.103	78.494	19.898	142.469	1458.21	1968.54	819.832	746.116	1347.72	1759.43	124.118
690.5	326.436	217.501	612.363	802.497	1390.59	991.035	78.8685	19.6849	143.162	1457.91	1970.27	820.205	747.375	1346.23	1761.5	125.364
691	327.872	218.214	614.759	803.074	1390.21	989.944	79.32	19.2011	143.146	1457.8	1971.8	821.246	748.938	1345.48	1763.33	126.14
691.5	328.732	218.637	617.21	804.857	1388.08	988.224	79.466	18.6335	142.467	1458.59	1972.76	822.728	750.859	1345.78	1765.37	126.254
692	329.036	218.888	619.308	807.452	1385.43	986.904	79.0425	18.2238	141.502	1460.34	1973.25	824.169	753.147	1346.93	1767.67	125.675
692.5	328.87	219.155	620.66	809.978	1383.73	986.623	78.115	18.009	140.688	1462.96	1973.48	824.87	755.703	1348.44	1769.95	124.707
693	328.489	219.593	621.31	811.35	1383.91	987.649	76.9719	18.0078	140.203	1465.67	1973.9	824.55	758.428	1349.76	1771.83	123.771
693.5	327.998	220.133	621.416	811.042	1386.04	989.393	75.9991	18.1568	140.032	1468	1974.87	823.288	761.024	1350.5	1772.9	123.168
694	327.563	220.516	621.338	809.445	1389.34	991.151	75.4127	18.379	139.869	1469.34	1976.34	821.986	763.203	1350.34	1773.23	122.979
694.5	327.206	220.498	621.348	807.587	1392.74	992.36	75.1423	18.6796	139.507	1469.39	1978.01	821.514	764.691	1349.36	1772.92	122.955
695	326.958	219.988	621.501	806.579	1395.47	993.04	74.9612	19.1054	138.779	1468.47	1979.29	822.546	765.581	1347.76	1772.56	122.8
695.5	326.71	219.136	621.77	807.054	1397.28	993.62	74.6295	19.6618	137.798	1467.12	1979.96	824.717	766.093	1346.03	1772.41	122.236
696	326.441	218.325	622.094	808.906	1398.41	994.415	74.0476	20.2892	136.9	1466.36	1980.05	827.144	766.66	1344.8	1772.91	121.236
696.5	326.161	217.875	622.534	811.453	1399.08	995.44	73.3071	20.8795	136.445	1466.67	1980.03	828.684	767.508	1344.7	1774.13	120.112
697	325.9	217.942	623.027	813.732	1399.39	996.141	72.5908	21.3456	136.728	1468.45	1980.38	828.71	768.718	1346.06	1776.28	119.318
697.5	325.839	218.358	623.586	815.149	1399.27	996.013	72.0861	21.612	137.703	1471.34	1981.44	827.261	769.922	1348.75	1779.19	119.274
698	326.128	218.847	624.096	815.642	1398.76	994.765	71.7878	21.6653	139.146	1474.6	1983.06	825.026	770.814	1352.18	1782.5	119.997
698.5	326.974	219.145	624.668	815.653	1397.91	992.926	71.6088	21.514	140.696	1477.4	1984.83	823.166	771.109	1355.67	1785.52	121.061
699	328.261	219.254	625.217	815.758	1397.24	991.438	71.4584	21.1918	141.933	1479.14	1986.3	822.506	770.972	1358.48	1787.4	121.816
699.5	329.836	219.397	625.721	816.421	1396.96	991.393	71.2424	20.7322	142.577	1479.75	1987.28	823.313	770.724	1360.32	1787.74	121.632
700	331.433	219.94	626.009	817.706	1397.32	993.02	70.9867	20.2266	142.5	1479.55	1987.89	825	770.737	1361.03	1786.58	120.384
700.5	332.882	221.011	625.911	819.31	1397.86	995.828	70.644	19.8347	141.816	1479.14	1988.3	826.836	771.092	1361.05	1784.88	118.376
701	334.227	222.548	625.227	820.744	1398.32	998.655	70.2628	19.7444	140.756	1479.05	1988.74	828.274	771.576	1360.66	1783.82	116.338
701.5	335.636	224.086	623.882	821.397	1398.49	1000.45	69.7469	20.0692	139.55	1479.45	1989.15	829.099	771.844	1360.41	1784.61	115.031
702	337.282	225.11	622.274	821.106	1398.56	1000.65	69.0893	20.7277	138.451	1480.32	1989.59	829.504	771.752	1360.22	1787.65	114.944
702.5	339.016	225.204	620.912	820.059	1398.87	999.391	68.3205	21.4739	137.581	1481.42	1989.84	829.721	771.601	1360.36	1792.25	115.964
703	340.638	224.378	620.567	819.127	1399.6	997.525	67.6239	21.9491	137.063	1482.57	1989.95	830.085	772.171	1360.78	1796.89	117.436
703.5	341.72	222.983	621.367	819.055	1400.77	995.93	67.2569	21.9209	136.932	1483.54	1989.81	830.663	774.164	1361.47	1799.97	118.551
704	342.059	221.456	623.223	820.271	1402.18	995.258	67.2781	21.3705	137.268	1484.05	1989.71	831.321	777.554	1361.93	1800.78	118.863
704.5	341.484	220.2	625.274	822.479	1403.71	995.585	67.5856	20.5952	138.065	1483.87	1989.81	832.011	781.545	1361.71	1799.51	118.293
705	340.268	219.336	626.827	824.804	1405.27	996.555	67.7926	19.9897	139.189	1482.95	1990.36	832.724	784.604	1360.69	1797.5	117.138
705.5	338.611	218.8	627.307	826.197	1406.92	997.618	67.65	19.8166	140.436	1481.43	1991.4	833.641	785.669	1358.93	1796.39	115.93
706	336.961	218.376	626.742	825.933	1408.44	998.349	66.9589	20.0158	141.539	1479.84	1992.83	834.677	783.827	1356.93	1797.36	115.093
706.5	335.512	217.984	625.57	824.173	1409.74	998.533	65.925	20.2397	142.265	1478.76	1994.48	835.746	780.122	1355.35	1800.26	114.827
707	334.486	217.584	624.252	821.747	1410.34	998.284	64.9118	20.1396	142.511	1478.69	1995.89	836.465	775.792	1354.92	1803.86	114.864
707.5	333.963	217.351	623.156	819.878	1410.11	997.713	64.3772	19.5368	142.323	1479.38	1996.78	836.62	772.601	1355.97	1806.81	114.961
708	334.038	217.348	622.408	819.339	1408.93	997.24	64.514	18.4957	141.959	1480.25	1997.02	835.991	771.179	1358.55	1807.94	114.862
708.5	334.926	217.676	622.125	820.237	1407.25	996.995	65.0437	17.3098	141.64	1480.56	1997.18	834.817	771.674	1362.15	1807.43	114.544
709	336.442	218.117	622.298	821.94	1405.58	997.113	65.5522	16.2949	141.522	1480.15	1998	833.432	773.574	1366.34	1806.01	114.053
709.5	338.427	218.508	622.945	823.609	1404.27	997.31	65.5836	15.6805	141.562	1479.33	2000.43	832.272	775.998	1370.16	1805.41	113.495
710	340.466	218.658	623.908	824.551	1403.55	997.396	65.0479	15.463	141.565	1478.9	2004.48	831.691	778.495	1373.29	1806.48	112.992
710.5	342.259	218.644	624.876	824.47	1403.48	997.236	64.1222	15.5477	141.301	1479.57	2009.67	831.605	780.905	1375.23	1809.4	112.535
711	343.552	218.656	625.314	823.608	1404.38	996.949	63.2178	15.8865	140.588	1481.53	2014.69	831.891	783.442	1375.88	1813.08	112.101
711.5	344.336	218.992	624.847	822.403	1406.23	996.826	62.6477	16.4605	139.375	1484.35	2018.18	832.133	785.871	1375.07	1816.24	111.616
712	344.775	219.835	623.571	821.252	1408.97	997.031	62.4791	17.2411	137.843	1486.96	2019.16	832.212	788.022	1373.19	1817.81	111.083
712.5	345.064	221.132	621.968	820.432	1412.13	997.584	62.5096	18.1305	136.321	1488.54	2017.65	832.108	789.441	1370.98	1817.58	110.501
713	345.225	222.623	620.774	820.13	1415.03	998.098	62.507	18.8779	135.148	1488.8	2014.9	832.08	789.956	1369.15	1816.43	109.905
713.5	345.242	223.787	620.516	820.686	1416.95	998.122	62.2934	19.2496	134.526	1488.2	2012.28	832.521	789.503	1368.44	1815.63	109.37
714	344.9	224.275	621.425	822.155	1417.35	997.242	61.9674	19.0735	134.43	1487.48	2010.87	833.713	788.528	1369.2	1816.55	108.964
714.5	344.087	223.885	623.175	824.549	1416.55	995.599	61.7179	18.5079	134.799	1487.15	2010.84	835.595	787.449	1371.35	1819.42	108.75
715	342.891	222.943	625.196	827.559	1415.17	993.799	61.7008	17.8928	135.345	1487.38	2011.71	837.834	786.865	1374.23	1823.84	108.756
715.5	341.667	221.861	627.059	830.625	1413.96	992.64	61.8287	17.6715	135.985	1487.91	2012.45	839.821	787.056	1377.05	1828.27	108.987
716	340.753	221.076	628.563	833.025	1413.05	992.704	61.8784	17.999	136.649	1488.31	2012.29	841.083	788.32	1379.19	1831.45	109.305
716.5	340.352	220.746	629.776	834.211	1412.34	994.011	61.6383	18.7525	137.403	1488.37	2010.79	841.427	790.28	1380.58	1832.64	109.537
717	340.366	220.776	630.729	834.146	1411.61	996.158	61.0975	19.5388	138.188	1488.19	2008.38	840.945	792.438	1381.55	1832.24	109.533
717.5	340.536	220.934	631.484	833.23	1410.81	998.344	60.4455	19.9173	138.882	1488.07	2005.67	840.213	794.242	1382.6	1831.22	109.286
718	340.575	220.946	631.951	832.028	1410.26	999.98	60.042	19.6699	139.327	1488.05	2003.34	839.581	795.238	1384.01	1830.73	108.953
718.5	340.412	220.807	632.04	830.911	1410.44	1000.76	60.1627	18.807	139.447	1488.09	2001.76	839.38	795.532	1385.73	1831.5	108.756
719	340.238	220.666	631.814	830.081	1411.58	1000.9	60.8864	17.7838	139.235	1487.93	2001.04	839.266	795.387	1387.26	1833.42	108.923
719.5	340.288	220.64	631.574	829.396	1413.24	1000.83	62.0637	16.9912	138.942	1487.63	2001.17	838.825	795.898	1388.19	1835.58	109.472
720	340.635	220.791	631.682	828.674	1414.55	1000.95	63.3581	16.8009	138.737	1487.04	2001.85	837.777	797.494	1388.38	1836.88	110.322
720.5	341.015	220.924	632.266	827.794	1414.62	1001.47	64.4261	17.1645	138.734	1486.2	2002.74	836.397	800.375	1388.17	1836.77	111.16
721	341.032	220.95	633.166	826.904	1413.31	1002.35	64.9887	17.9218	138.816	1485.12	2003.49	835.348	803.573	1388.32	1835.34	111.69
721.5	340.304	220.69	633.972	826.445	1411.15	1003.43	64.9497	18.7764	138.698	1483.85	2003.8	835.47	806.253	1389.39	1833.61	111.705
722	338.951	220.262	634.4	826.712	1409.39	1004.4	64.3858	19.4934	138.217	1482.36	2003.47	837.005	807.83	1391.64	1832.68	111.269
722.5	337.409	219.902	634.334	827.826	1408.81	1004.95	63.5025	19.9658	137.379	1480.58	2002.46	839.69	808.371	1394.45	1833.57	110.582
723	336.499	219.823	634.006	829.637	1409.61	1004.84	62.548	20.1592	136.583	1479.11	2001.06	842.284	808.563	1397.1	1836.35	109.871
723.5	336.715	220.121	633.676	831.599	1411.15	1003.97	61.7716	20.1386	136.26	1478.42	1999.71	843.786	809.015	1399.04	1840.68	109.35
724	338.231	220.67	633.607	833.264	1412.5	1002.47	61.3095	19.9002	136.685	1478.99	1998.97	843.583	809.856	1400.12	1845.8	109.185
724.5	340.762	221.34	633.809	834.124	1413.01	1000.91	61.1634	19.5113	137.894	1480.59	1999.2	841.999	810.633	1400.73	1850.9	109.414
725	343.766	221.95	634.03	834.323	1412.55	999.959	61.1933	19.0904	139.56	1482.8	2000.48	840.062	810.76	1401.59	1855.53	109.985
725.5	346.75	222.414	634.046	834.132	1411.68	1000.24	61.2949	18.8411	141.234	1484.93	2002.61	838.7	810.355	1403.28	1859.31	110.836
726	349.256	222.657	633.75	834.167	1411.05	1001.93	61.4008	18.9357	142.443	1486.36	2004.8	838.598	810.091	1405.99	1862.29	111.739
726.5	350.968	222.679	633.35	834.635	1410.96	1004.57	61.5809	19.3779	142.921	1486.86	2006.24	839.34	811.161	1409.41	1864.49	112.523
727	351.621	222.477	633.099	835.557	1411.5	1007.3	61.9362	20.045	142.678	1486.52	2006.15	840.325	814.532	1413.24	1866.33	112.924
727.5	350.974	222.053	633.245	836.48	1412.3	1008.84	62.5136	20.6561	141.852	1485.79	2004.63	840.756	820.067	1417.13	1868.22	112.993
728	349.221	221.457	633.747	836.92	1413.05	1008.75	63.1847	20.9509	140.936	1484.9	2002.27	840.462	827.012	1420.93	1870.62	112.772
728.5	346.818	220.772	634.4	836.415	1413.28	1007	63.7238	20.7497	140.514	1484.1	2000.01	839.563	833.873	1424.97	1874.24	112.454
729	344.511	220.062	634.861	834.944	1412.79	1004.45	63.9886	20.0583	141.219	1483.31	1998.83	838.557	839.94	1429.72	1879.35	112.277
729.5	343.111	219.282	635.092	832.986	1411.68	1002.01	63.9028	19.0802	143.465	1482.6	1999.03	837.73	845.228	1435.62	1886.27	112.387
730	342.974	218.402	635.082	831.304	1409.92	1000.65	63.56	18.014	146.993	1481.99	2000.24	837.146	850.477	1443.36	1894.77	112.851
730.5	344.112	217.413	635.112	830.51	1407.83	1000.72	63.0717	17.0796	151.053	1481.5	2001.35	836.502	856.807	1453.27	1904.72	113.5
731	345.715	216.566	635.415	830.826	1405.79	1001.85	62.5837	16.3772	154.32	1481.24	2001.42	835.659	864.874	1465.75	1915.91	114.19
731.5	347.067	216.124	636.113	831.831	1404.57	1003.44	62.092	15.9977	155.733	1481.18	2000.19	834.573	874.791	1480.95	1928.21	114.786
732	347.542	216.428	637.111	832.854	1404.55	1004.98	61.6402	15.9951	154.778	1481.47	1998.19	833.379	885.992	1498.62	1941.56	115.267
732.5	347.179	217.456	638.001	833.233	1405.79	1006.45	61.3524	16.3666	151.719	1481.98	1996.31	832.383	898.309	1518.25	1956.08	115.652
733	346.297	218.923	638.598	832.771	1408.02	1007.99	61.5148	17.1028	147.795	1482.71	1994.98	831.811	911.517	1539.43	1971.67	115.978
733.5	345.372	220.297	638.743	831.806	1410.65	1009.76	62.414	17.9822	144.233	1483.43	1994.22	831.816	925.993	1561.34	1988.2	116.18
734	344.659	221.005	638.718	830.873	1412.99	1011.63	64.1335	18.75	141.948	1483.83	1993.47	832.242	941.843	1583.35	2005.64	116.208
734.5	344.213	220.823	638.742	830.729	1414.61	1013.18	66.4635	19.1332	140.919	1483.5	1992.13	832.926	958.647	1604.97	2023.57	115.917
735	343.946	219.804	639.174	831.581	1415.39	1013.91	68.7642	19.0437	140.697	1482.07	1990.06	833.579	975.518	1625.21	2041.39	115.323
735.5	343.88	218.54	639.985	833.307	1415.51	1013.6	70.4541	18.6155	140.564	1479.67	1987.58	833.856	991.078	1643.13	2057.88	114.496
736	344.147	217.543	640.981	835.26	1415.05	1012.57	71.1139	18.0771	140.223	1476.8	1985.49	833.411	1004.15	1656.97	2071.91	113.698
736.5	344.98	217.294	641.702	836.919	1414.19	1011.42	70.8974	17.7133	139.782	1474.31	1984.26	832.109	1013.38	1665.97	2082.11	113.246
737	346.372	217.658	641.848	837.965	1412.97	1010.69	70.1941	17.6032	139.75	1472.84	1984.16	830.186	1017.98	1669.43	2087.11	113.321
737.5	348.004	218.355	641.334	838.407	1411.55	1010.57	69.551	17.7122	140.347	1472.6	1985	828.156	1017.82	1666.33	2086.24	113.955
738	349.332	218.847	640.417	838.458	1410.2	1010.8	69.2354	17.8285	141.468	1473.22	1986.52	826.747	1012.72	1657.73	2079.77	114.814
738.5	349.718	218.924	639.6	838.311	1409.29	1010.82	69.1947	17.8355	142.711	1473.86	1988.75	826.544	1003.38	1644.07	2068.24	115.541
739	348.971	218.476	639.251	837.928	1409.22	1010.36	69.1203	17.6725	143.494	1473.7	1991.62	827.793	991.03	1625.9	2053.04	115.688
739.5	347.291	217.717	639.593	837.195	1410	1009.53	68.7428	17.5112	143.582	1472.44	1994.84	830.111	976.726	1604.41	2035.84	115.188
740	345.548	216.974	640.387	836.027	1411.32	1008.92	67.9688	17.4233	143.105	1470.76	1997.7	832.792	961.718	1580.83	2017.94	114.171
740.5	344.631	216.58	641.343	834.522	1412.47	1008.98	67.0086	17.4713	142.537	1469.68	1999.25	835.113	946.792	1556.55	2000.72	113.113
741	345.191	216.773	642.005	832.941	1413.04	1009.9	66.1371	17.5412	142.286	1470.2	1999.05	836.454	932.347	1533.25	1985.02	112.497
741.5	347.146	217.344	642.178	831.54	1412.76	1011.49	65.5524	17.5542	142.461	1472.44	1997.04	836.612	918.335	1512.2	1971.37	112.68
742	349.804	218.088	641.724	830.442	1411.85	1013.19	65.2735	17.4776	142.953	1475.72	1994.32	835.555	904.776	1494.29	1959.84	113.703
742.5	352.119	218.597	640.789	829.614	1410.86	1014.56	65.2127	17.3493	143.469	1478.78	1991.98	833.855	892.047	1479.35	1949.96	115.178
743	353.248	218.683	639.567	828.934	1410.47	1015.22	65.3393	17.3001	143.875	1480.24	1990.88	831.955	880.549	1466.79	1941.25	116.649
743.5	352.711	218.237	638.268	828.523	1411.03	1015.18	65.6064	17.4205	144.094	1479.63	1990.96	830.579	870.61	1455.85	1932.86	117.577
744	350.692	217.333	637.163	828.406	1412.48	1014.36	66.0056	17.7344	144.206	1477.32	1991.61	830.027	862.431	1445.52	1924.32	117.711
744.5	348.033	216.265	636.579	828.717	1414.21	1012.7	66.4424	18.1882	144.218	1474.64	1992.16	830.401	855.638	1435.56	1915.4	116.95
745	345.702	215.256	636.994	829.262	1415.55	1010.33	66.6956	18.7335	144.12	1472.94	1992.25	831.211	849.603	1425.85	1906.33	115.514
745.5	344.559	214.553	638.434	829.832	1415.53	1007.64	66.5473	19.2904	143.913	1473.03	1992.05	831.768	843.746	1416.67	1897.65	113.815
746	344.762	214.227	640.683	830.155	1414.01	1005.37	65.7604	19.7941	143.637	1474.71	1991.81	831.458	837.862	1408.29	1890.06	112.252
746.5	346.262	214.196	643.193	830.142	1411.08	1004.23	64.5015	20.11	143.479	1477.08	1991.57	830.066	832.06	1400.98	1884.05	111.196
747	348.383	214.381	645.338	830.072	1407.63	1004.62	63.0071	20.159	143.603	1479.14	1991.04	828.087	826.995	1394.82	1879.91	110.707
747.5	350.34	214.614	646.559	830.339	1404.55	1006.28	61.6507	19.8469	144.081	1480.23	1989.77	826.233	822.781	1389.91	1877.43	110.68
748	351.417	214.873	646.586	831.332	1402.62	1008.33	60.655	19.2405	144.756	1480.2	1987.83	825.396	819.737	1386.3	1875.96	110.744
748.5	351.241	215.065	645.695	832.893	1402.18	1009.73	60.1356	18.5718	145.333	1479.35	1985.74	825.64	817.775	1383.64	1874.7	110.555
749	349.941	215.201	644.445	834.566	1402.84	1009.86	60.1345	18.1474	145.531	1478.14	1984.66	826.712	816.545	1381.76	1873.3	109.903
749.5	347.864	215.332	643.37	835.629	1403.96	1008.76	60.5837	18.1883	145.214	1476.7	1985.28	827.629	815.452	1380.27	1871.7	108.846
750	345.844	215.448	642.79	835.74	1404.88	1007.13	61.4051	18.6433	144.447	1475.08	1987.73	827.89	814.109	1378.91	1870.07	107.722
750.5	344.574	215.57	642.673	834.935	1405.18	1005.83	62.5281	19.2851	143.465	1473.3	1991.37	827.214	812.575	1377.05	1868.76	106.889
751	344.65	215.742	642.784	833.725	1404.87	1005.44	63.6803	19.7249	142.528	1471.77	1994.71	826.006	811.043	1374.48	1867.95	106.632
751.5	345.998	216.092	642.716	832.747	1404.13	1005.81	64.6191	19.7048	141.757	1471.08	1996.65	824.89	809.914	1371.13	1867.69	106.842
752	348.168	216.688	642.233	832.45	1403.31	1006.49	64.9941	19.2032	141.163	1471.7	1996.48	824.411	809.419	1367.35	1867.42	107.277
752.5	350.477	217.529	641.22	832.892	1402.53	1006.99	64.669	18.4386	140.624	1473.9	1994.99	824.773	809.577	1363.58	1866.81	107.541
753	352.304	218.561	639.932	833.736	1401.8	1007.2	63.7006	17.7316	140.061	1477.09	1993.2	825.75	810.12	1360.57	1865.78	107.449
753.5	353.382	219.64	638.635	834.592	1401.17	1007.33	62.4023	17.2601	139.395	1480.45	1992.34	827.118	810.535	1359.19	1864.84	107.041
754	353.8	220.604	637.617	835.128	1400.77	1007.74	61.3841	17.1167	138.659	1482.76	1992.9	828.676	810.501	1359.59	1864.55	106.577
754.5	354.103	221.28	636.976	835.181	1400.82	1008.58	61.0212	17.1837	137.946	1483.7	1994.71	830.343	809.956	1361.13	1865.42	106.436
755	354.779	221.659	636.739	834.695	1401.45	1009.58	61.6019	17.353	137.443	1483.39	1996.95	832.177	809.379	1362.55	1867.28	106.936
755.5	356.128	221.872	636.732	833.801	1402.58	1010.25	62.8088	17.5718	137.375	1482.48	1998.57	834.153	809.323	1362.59	1869.44	108.035
756	357.923	222.109	636.921	832.627	1403.89	1010.23	64.3155	17.8866	137.915	1481.64	1998.92	836.264	810.283	1360.61	1870.89	109.523
756.5	359.75	222.548	637.322	831.539	1404.98	1009.54	65.5449	18.3813	139.065	1481.18	1997.86	838.492	812.151	1357.15	1870.89	111.052
757	361.055	223.199	638.263	830.843	1405.66	1008.64	66.1419	19.0193	140.672	1481.17	1996.24	840.922	814.334	1353.68	1869.46	112.367
757.5	361.465	224.059	639.899	830.908	1406.15	1008.33	65.9976	19.6866	142.392	1481.21	1995.02	843.497	815.937	1352.01	1867.27	113.286
758	361.019	224.953	642.229	831.844	1406.78	1009.16	65.3525	20.2092	143.717	1481.16	1995.22	846.11	816.089	1353.11	1865.42	113.81
758.5	360.041	225.764	645.01	833.591	1408.15	1011.3	64.7186	20.4769	144.209	1481.15	1997.02	848.312	814.656	1356.81	1864.83	114.185
759	359.27	226.337	647.473	835.954	1410.32	1014.28	64.5553	20.485	143.802	1481.61	2000.12	849.649	811.928	1361.57	1865.92	114.673
759.5	359.213	226.69	649.005	838.586	1413.13	1017.35	65.1012	20.3145	142.805	1482.88	2003.61	849.596	809.042	1365.47	1868.51	115.57
760	360.281	226.923	649.031	841.199	1415.71	1019.74	66.2293	20.133	141.795	1484.83	2006.55	848.412	806.96	1367.01	1871.85	116.98
760.5	362.301	227.224	647.905	843.539	1417.33	1020.92	67.4922	20.0908	141.348	1487.01	2008.37	846.745	806.597	1366.1	1875.14	118.911
761	364.91	227.821	646.236	845.293	1417.43	1020.81	68.3988	20.3328	141.854	1488.52	2009.31	845.595	808.107	1363.73	1877.75	121.254
761.5	367.685	228.961	645.001	846.226	1416.15	1019.64	68.6345	20.8853	143.376	1488.88	2010.1	845.747	811.205	1361.52	1879.52	123.755
762	370.26	230.755	644.959	846.235	1414.18	1017.88	68.2357	21.7593	145.37	1487.8	2011.58	847.38	815.177	1360.8	1880.63	126.225
762.5	372.577	233.163	646.449	845.399	1412.51	1016.06	67.5312	22.9363	147.235	1486.04	2013.99	850.231	819.152	1362.12	1881.13	128.551
763	374.613	236.142	649.255	844.207	1411.98	1014.61	66.9347	24.266	148.336	1484.45	2017.04	853.359	822.596	1365.24	1881.59	130.844
763.5	376.426	239.228	652.553	843.248	1412.94	1013.8	66.7654	25.5643	148.534	1484.13	2020.13	856.202	825.194	1369.33	1882.2	133.387
764	377.973	242.244	655.474	843.236	1415.37	1013.65	67.1414	26.6095	148.067	1485.35	2022.67	858.642	827.205	1373.66	1883.59	136.619
764.5	379.288	245.036	657.424	844.428	1418.64	1014.03	67.9631	27.4031	147.479	1487.98	2024.67	861.269	828.978	1377.4	1885.68	140.819
765	380.587	247.754	658.275	846.676	1422.17	1014.58	69.1127	28.0728	147.379	1491.2	2026.4	864.775	831.093	1380.23	1888.63	146.184
765.5	382.159	250.534	658.318	849.487	1425.47	1015.03	70.4515	28.9892	148.046	1494.14	2028.35	869.601	833.683	1381.83	1892.34	152.573
766	384.393	253.561	658.01	852.047	1428.51	1015.18	71.9516	30.4006	149.495	1496.3	2030.47	875.337	836.593	1382.17	1896.64	159.408
766.5	387.255	256.89	657.945	853.706	1431.34	1015.16	73.551	32.422	151.325	1497.39	2032.28	881.087	839.187	1381.38	1901.34	166.007
767	390.472	260.377	658.513	854.001	1434.21	1015.37	75.1734	34.931	153.09	1497.78	2033.15	885.482	840.872	1379.78	1905.81	171.552
767.5	393.269	263.74	659.806	853.102	1436.86	1016.27	76.6931	37.3798	154.529	1497.73	2033.07	887.812	841.247	1377.95	1909.71	175.661
768	395.026	266.688	661.628	851.529	1439.17	1018.24	78.1008	39.2371	155.723	1497.76	2032.67	887.721	840.536	1376.42	1912.49	177.994
768.5	395.436	268.863	663.752	850.244	1440.77	1021.13	79.4416	39.9317	156.914	1498.17	2033.23	885.932	839.515	1375.63	1914.42	178.735
769	394.84	269.892	665.802	850.164	1441.86	1024.43	80.9036	39.5608	158.372	1499.11	2035.48	883.496	839.117	1375.44	1915.77	178.333
769.5	394.005	269.717	667.605	851.808	1442.61	1027.39	82.7074	38.3232	160.135	1500.48	2039.53	881.417	840.047	1375.81	1917.44	177.135
770	393.599	268.254	669.007	854.992	1443.39	1029.42	84.8101	36.7201	162.134	1502.02	2043.79	880.004	842.267	1376.54	1919.96	175.585
770.5	393.932	265.804	670.097	858.652	1444.57	1030.44	87.0425	35.2468	164.085	1503.5	2046.44	879.127	845.222	1377.81	1923.44	173.994
771	394.817	262.916	671.038	861.57	1446.18	1030.85	89.0579	34.2461	165.773	1504.79	2045.69	878.31	848.084	1379.2	1927.3	172.651
771.5	395.862	260.242	672.12	862.772	1448.19	1031.29	90.7974	33.7465	167.083	1506.02	2042.14	876.905	850.18	1380.51	1930.76	171.747
772	396.878	258.245	673.847	862.293	1450.42	1032.59	92.3477	33.5375	168.073	1507.45	2037.55	874.9	851.259	1381.32	1933.51	171.499
772.5	398.02	257.084	676.495	860.937	1453.03	1035.13	94.1966	33.4457	168.931	1509.37	2034.71	872.658	851.628	1381.67	1936.06	172.26
773	399.65	256.664	680.344	859.896	1456.41	1039.03	96.8175	33.3994	169.815	1511.72	2035.38	871.023	851.87	1381.77	1939.72	174.244
773.5	401.894	256.669	685.1	860.105	1461.04	1044.02	100.595	33.4502	171.065	1514.11	2039.87	870.504	852.407	1382.33	1946.02	177.511
774	404.547	256.86	690.334	861.603	1467.29	1049.79	105.757	33.7014	172.975	1515.97	2047.18	871.299	853.66	1384.23	1955.83	182.267
774.5	407.168	257.191	695.55	863.758	1475.25	1056.14	111.862	34.2679	176.019	1516.72	2054.73	873.093	855.394	1387.93	1968.67	188.293
775	409.281	257.786	700.57	865.509	1484.26	1063.01	118.496	35.0944	180.415	1516.52	2060.88	875.01	857.56	1393.09	1983.17	195.311
775.5	411.024	258.723	705.628	866.463	1494.11	1070.42	125.274	36.1244	186.084	1516.02	2064.54	876.369	859.612	1398.6	1997.53	203.217
776	413.031	260.15	711.493	866.84	1504.34	1078.37	132.127	37.2631	192.83	1516.33	2066.51	876.827	861.464	1403.27	2010.68	211.677
776.5	416.29	261.958	718.911	867.645	1514.87	1086.92	139.283	38.5455	200.127	1518.18	2067.6	876.858	862.877	1406.29	2022.77	220.72
777	421.368	264.066	728.303	869.525	1525.8	1096.08	147.244	40.1301	207.59	1521.49	2068.48	877.22	863.633	1407.96	2034.89	230.629
777.5	428.145	266.489	739.762	872.59	1537.4	1105.98	156.377	42.1583	215.035	1525.54	2069.31	878.638	863.99	1409.11	2048.29	241.73
778	435.611	269.331	752.46	876.209	1550	1116.87	166.854	44.6342	222.687	1529.04	2069.75	881.246	864.218	1410.95	2063.65	254.179
778.5	442.527	272.686	765.515	879.458	1563.12	1128.73	178.553	47.4312	230.642	1531.19	2069.57	884.599	865.008	1413.87	2080.58	268.016
779	447.977	276.616	777.992	881.711	1576.35	1141.28	190.748	50.2204	238.768	1531.96	2068.97	887.871	866.649	1417.99	2097.87	282.646
779.5	451.782	280.962	789.266	882.729	1588.76	1153.6	202.597	52.7058	246.427	1532.28	2068.48	890.194	869.382	1422.75	2113.82	297.097
780	454.495	285.547	798.821	883.093	1599.68	1164.6	212.982	54.6444	252.712	1533.37	2068.99	891.251	872.881	1427.67	2127.16	310.082
780.5	456.599	290.28	806.077	883.433	1608.09	1173.04	221.029	56.0001	256.617	1536.09	2070.81	891.45	876.755	1432.56	2136.88	320.546
781	458.71	295.118	810.686	884.306	1613.44	1177.8	225.716	56.8605	257.522	1540.43	2074.16	891.705	880.509	1437.44	2142.26	327.717
781.5	460.493	300.153	812.166	885.778	1614.94	1178.73	226.283	57.2461	255.83	1545.56	2078.46	892.942	884.087	1442.43	2143.06	330.894
782	461.287	305.457	809.933	887.832	1612.68	1176.08	222.892	57.2321	251.991	1550.47	2082.94	895.413	887.684	1447	2139.47	330.32
782.5	460.104	310.988	804.343	890.625	1606.99	1170.25	215.717	56.8403	246.942	1554.25	2086.81	898.875	891.811	1450.67	2131.22	326.294
783	456.463	316.634	795.762	894.235	1597.75	1162.3	205.559	56.0349	241.325	1556.81	2089.46	902.544	896.681	1453.11	2119.07	319.099
783.5	450.476	322.32	784.967	898.725	1586.02	1152.82	193.663	55.0671	235.335	1558.64	2090.91	905.715	902.206	1454.66	2104.12	309.652
784	442.909	327.998	773.062	903.928	1572.66	1142.15	181.082	54.1008	229.082	1560.58	2091.41	907.985	908.023	1456.2	2087.65	298.652
784.5	434.912	333.704	760.925	909.11	1558.7	1130.8	168.756	53.3705	222.526	1563.26	2091.9	909.532	913.691	1458.77	2071.3	286.867
785	427.569	339.431	749.38	913.487	1545.16	1119.21	157.202	52.8987	215.82	1566.91	2093.13	910.8	918.956	1462.77	2056.32	275.135
785.5	421.912	344.973	738.987	916.246	1532.81	1107.93	146.629	52.6021	209.205	1571.08	2095.77	912.129	923.829	1467.81	2043.88	264.07
786	418.298	349.969	730.144	917.579	1522.24	1097.41	137.018	52.2879	203.021	1575.15	2099.92	913.451	928.455	1472.77	2033.96	254.169
786.5	416.823	353.812	723.028	917.954	1513.3	1088.01	128.256	51.7413	197.503	1578.26	2105.05	914.48	932.671	1476.65	2026.27	245.525
787	416.873	356.116	717.395	918.107	1505.59	1079.94	120.455	50.8966	192.47	1580.04	2110.55	914.945	936.068	1478.98	2020.08	238.14
787.5	417.818	356.503	713.084	918.486	1498.7	1073.06	113.634	49.7113	187.783	1580.16	2115.63	914.901	938.093	1479.96	2014.5	231.825
788	418.92	354.73	709.683	919.038	1492.32	1067.23	107.796	48.2797	183.346	1578.5	2119.92	914.936	938.43	1480.46	2008.81	226.234
788.5	419.709	351.144	706.872	919.131	1486.47	1062.55	103.022	46.6999	179.275	1575.72	2123.11	915.807	937.049	1480.88	2002.91	221.108
789	419.836	346.036	704.576	918.094	1481.63	1058.87	99.1254	45.0709	175.744	1572.21	2125.29	918.248	934.652	1480.98	1997.35	216.246
789.5	419.143	339.95	702.756	915.527	1477.97	1056.23	95.8842	43.502	173.003	1568.63	2126.74	922.176	931.908	1480.04	1992.87	211.493
790	417.639	333.613	701.305	911.39	1475.49	1054.45	93.0894	42.1065	171.183	1565.28	2127.75	927.156	929.558	1477.26	1989.92	206.796
790.5	415.461	327.583	700.007	906.477	1473.71	1053.17	90.5865	40.9558	170.093	1562.5	2128.75	932.356	927.601	1472.34	1988.42	202.227
791	412.756	322.192	698.747	901.62	1471.69	1052.04	88.268	40.0398	169.528	1560.26	2130.01	937.098	925.471	1465.84	1987.91	197.823
791.5	409.828	317.3	697.338	897.74	1468.66	1050.65	86.2415	39.2319	169.081	1558.43	2131.66	941.143	922.755	1459.16	1987.52	193.7
792	407.069	312.556	695.827	895.272	1464.34	1049.07	84.4434	38.4162	168.61	1556.67	2133.41	944.778	919.234	1453.86	1986.38	189.861
792.5	405.002	307.461	694.266	894.367	1459.2	1047.29	82.8957	37.4932	167.966	1554.71	2135.07	948.547	915.363	1451.15	1984.11	186.356
793	404.083	301.836	692.948	894.828	1454.39	1045.59	81.5967	36.5391	167.233	1552.43	2136.52	952.917	911.756	1451.22	1980.92	183.264
793.5	404.395	295.999	692.176	895.944	1451.04	1044.11	80.4435	35.706	166.473	1549.94	2138.17	957.94	909.116	1453.53	1977.54	180.599
794	405.765	290.623	691.877	897.075	1449.88	1042.91	79.3767	35.1818	165.762	1547.59	2140.5	963.235	907.631	1456.89	1974.53	178.318
794.5	407.63	286.375	691.945	897.663	1450.4	1042.05	78.2883	35.0529	165.064	1545.6	2144.04	968.25	906.822	1460.03	1972.6	176.384
795	409.388	283.565	692.122	897.573	1451.6	1041.48	77.2283	35.2927	164.295	1544.31	2148.43	972.629	905.923	1462.04	1971.9	174.69
795.5	410.495	281.926	692.258	897.04	1452.41	1041.42	76.1742	35.7505	163.493	1543.76	2152.8	976.236	904.42	1462.61	1972.62	173.168
796	410.768	280.732	692.208	896.509	1452.22	1041.82	75.215	36.2946	162.695	1543.89	2155.8	979.162	902.397	1462.13	1974.49	171.91
796.5	410.39	279.382	691.923	896.43	1451.43	1042.46	74.39	36.8283	162.107	1544.17	2156.87	981.583	900.431	1461.08	1977.11	170.945
797	409.798	277.578	691.552	896.826	1450.81	1043.03	73.8114	37.2681	161.913	1544.14	2156.28	983.766	899.248	1459.77	1979.98	170.345
797.5	409.438	275.597	691.079	897.424	1451.42	1043.17	73.5499	37.5618	162.23	1543.38	2155.08	985.634	899.135	1458.34	1982.54	170.047
798	409.684	274.013	690.514	897.734	1453.39	1042.79	73.6252	37.635	162.99	1541.77	2154.63	987.112	899.84	1456.6	1984.35	169.91
798.5	410.51	273.259	689.776	897.448	1455.91	1042.12	73.8947	37.4387	163.94	1539.61	2155.57	988.035	900.825	1454.52	1984.92	169.625
799	411.619	273.37	688.939	896.651	1457.73	1041.71	74.1718	36.9807	164.732	1537.56	2157.72	988.28	901.504	1452.28	1984.37	168.96
799.5	412.595	273.89	688.161	895.782	1458.09	1042.09	74.158	36.3506	165.041	1536.66	2159.91	987.894	901.784	1450.44	1983.03	167.717
800	413.243	274.257	687.754	895.266	1457.23	1043.32	73.809	35.7045	164.848	1537.28	2161.26	986.892	901.883	1449.65	1981.47	166.046
800.5	413.591	273.986	688.032	895.238	1456.34	1045.03	73.2477	35.1181	164.406	1539.23	2161.31	985.166	902.232	1449.95	1980.24	164.125
801	413.816	272.981	689.353	895.457	1456.69	1046.5	72.8599	34.6294	164.196	1541.37	2160.7	982.385	902.79	1450.98	1979.71	162.106
801.5	414.224	271.427	691.53	895.547	1458.77	1047.05	72.9223	34.214	164.489	1542.46	2160.03	978.579	903.242	1451.92	1980.21	160.115
802	415.017	269.712	694.292	895.361	1461.84	1046.5	73.55	33.9341	165.307	1541.53	2159.65	973.644	903.191	1452.23	1981.43	158.089
802.5	416.413	268.226	697.037	895.091	1464.43	1045.08	74.5717	33.9175	166.352	1538.56	2159.09	968.083	902.61	1451.65	1982.91	155.966
803	418.304	267.21	699.282	895.335	1465.26	1043.63	75.6284	34.3	167.065	1534.93	2157.44	962.368	901.816	1450.3	1984.26	153.67
803.5	420.682	266.846	700.618	896.333	1464.06	1042.74	76.3666	35.139	167.12	1532.52	2153.85	956.996	901.356	1448.5	1985.12	151.281
804	423.595	267.301	700.864	897.918	1461.71	1042.81	76.5829	36.2186	166.483	1533.05	2148.54	952.22	901.788	1446.27	1985.88	149.029
804.5	426.897	268.558	700.235	899.205	1459.59	1043.71	76.3689	37.1842	165.548	1536.48	2142.24	947.833	903.134	1443.53	1986.99	147.199
805	430.226	270.4	698.893	899.344	1458.72	1045.06	75.9469	37.654	164.86	1541.27	2136.03	943.495	905.06	1440.2	1989.36	146.047
805.5	432.702	272.51	697.17	897.869	1458.89	1046.35	75.5688	37.5594	164.72	1544.95	2130.73	938.971	906.779	1436.7	1993.18	145.524
806	433.734	274.315	695.354	895.206	1459.12	1047.23	75.3522	37.1085	165.165	1545.49	2126.51	934.481	908.029	1433.79	1998.21	145.367
806.5	432.952	275.534	693.824	892.541	1458.19	1047.54	75.3473	36.6867	165.655	1542.61	2122.83	930.554	908.689	1432.28	2003.35	145.186
807	430.472	276.005	692.952	891.211	1455.93	1047.33	75.5607	36.6032	165.689	1537.53	2118.94	927.699	909.085	1432.42	2007.15	144.574
807.5	427.453	276.056	692.825	892.202	1453.07	1046.7	75.9728	36.8906	165.125	1532.83	2114.38	925.956	909.137	1433.58	2008.43	143.393
808	425.089	276.008	693.373	895.104	1451.14	1045.98	76.5112	37.3672	164.233	1530.39	2109.53	924.933	908.701	1434.42	2007.09	141.73
808.5	424.612	276.147	694.192	898.718	1451.22	1045.4	76.9898	37.6664	163.674	1530.9	2105.09	923.694	907.497	1433.59	2004.14	140.04
809	425.921	276.534	694.892	901.293	1453.52	1045.19	77.2673	37.6563	163.878	1533.02	2101.98	921.551	905.543	1430.62	2001.01	138.76
809.5	428.363	276.967	695.295	901.888	1457.32	1045.43	77.2023	37.337	165.055	1534.79	2100.49	918.345	903.364	1426.08	1999.07	138.259
810	430.726	277.143	695.316	900.382	1461.19	1046.1	76.8541	37.0361	166.769	1534.6	2100.23	914.685	901.55	1421.44	1998.65	138.527
810.5	431.886	276.948	695.255	897.648	1463.79	1047.09	76.3508	36.9589	168.152	1532.48	2100.44	911.457	900.824	1418.2	1999.46	139.293
811	431.469	276.431	695.216	894.977	1464.33	1048.18	75.8927	37.2481	168.473	1529.68	2100.2	909.544	901.103	1417.25	2000.44	140.209
811.5	429.754	275.873	695.343	893.47	1462.95	1049.26	75.5209	37.8241	167.439	1527.98	2099.14	908.966	902.173	1418.42	2000.94	140.888
812	427.829	275.609	695.396	893.539	1460.49	1050.26	75.1596	38.5173	165.591	1528.18	2097.41	909.26	903.156	1420.57	2000.79	141.212
812.5	426.594	275.957	695.18	894.8	1457.94	1051.21	74.7224	39.2039	163.794	1530.01	2095.68	909.61	903.784	1422.49	2000.4	141.225
813	426.722	277.098	694.745	896.47	1456.38	1051.98	74.2801	39.7911	162.951	1532.14	2094.46	909.353	904.07	1423.29	2000.62	141.219
813.5	428.204	278.743	694.393	897.923	1456.27	1052.29	74.0739	40.2462	163.475	1533.4	2093.88	908.281	904.688	1422.96	2001.85	141.527
814	430.711	280.513	694.738	899.092	1457.63	1051.9	74.3645	40.5081	165.1	1533.2	2093.41	906.62	905.933	1422.06	2003.96	142.401
814.5	433.633	281.834	696.011	900.25	1460.06	1050.78	75.2007	40.522	167.126	1532	2092.36	904.854	907.653	1421.39	2006.27	143.854
815	436.401	282.398	698.208	901.853	1462.69	1049.26	76.439	40.3196	168.728	1530.88	2090.28	903.309	909.428	1421.32	2008.1	145.721
815.5	438.542	282.09	700.896	903.896	1464.86	1047.91	77.7087	39.9951	169.421	1530.61	2087.66	901.98	910.749	1421.8	2009.22	147.676
816	439.929	281.221	703.348	906.071	1465.88	1047.35	78.7679	39.733	169.214	1531.4	2085.33	900.835	911.68	1422.19	2009.59	149.308
816.5	440.752	280.388	704.949	907.645	1465.86	1047.94	79.6066	39.7193	168.571	1532.48	2084.38	899.907	912.344	1421.97	2009.46	150.338
817	441.332	280.253	705.213	907.881	1464.96	1049.46	80.3284	40.0227	168.05	1533.31	2085.03	899.348	913.315	1420.94	2009.03	150.788
817.5	442.092	281.156	704.536	906.648	1463.48	1051.13	81.0801	40.5762	168.063	1533.5	2086.83	899.338	914.629	1419.47	2008.63	151.068
818	443.168	282.982	703.375	904.365	1461.64	1052.22	81.8016	41.2081	168.624	1533.44	2088.83	899.989	916.061	1418.41	2008.36	151.733
818.5	444.66	285.422	702.437	902.125	1459.55	1052.28	82.3827	41.8515	169.602	1533.59	2090.06	901.313	916.877	1418.44	2008.38	153.311
819	446.159	288.068	702.131	900.781	1457.4	1051.49	82.7058	42.5536	170.668	1534.33	2090.33	902.995	916.645	1419.8	2008.84	155.876
819.5	447.268	290.674	702.717	900.793	1455.6	1050.34	82.8388	43.4949	171.609	1535.63	2089.9	904.872	915.703	1421.78	2009.98	159.279
820	447.716	293.074	704.117	901.88	1454.7	1049.48	83.0752	44.8194	172.258	1537.15	2089.55	906.929	914.933	1423.51	2011.72	162.875
820.5	447.775	295.298	705.946	903.211	1455.28	1049.36	83.5567	46.4865	172.667	1538.46	2089.65	909.275	915.381	1424.18	2013.85	166.127
821	447.997	297.335	707.772	903.928	1457.33	1049.81	84.1881	48.3025	172.918	1539.33	2090.21	912.137	917.25	1423.64	2016.08	168.656
821.5	448.872	299.213	709.285	903.609	1460.56	1050.57	84.738	49.9783	173.177	1539.65	2090.7	915.431	920.199	1422.35	2018.1	170.527
822	450.702	300.976	710.352	902.483	1464.28	1051.35	85.0112	51.3225	173.572	1539.3	2090.85	918.869	923.296	1421	2019.62	172.099
822.5	453.354	302.772	710.931	901.273	1467.61	1052.22	85.0293	52.2987	174.214	1538.18	2090.5	921.896	925.666	1420.29	2020.52	173.753
823	456.545	304.924	711.036	900.647	1469.93	1053.39	84.9009	53.1557	175.135	1536.34	2090.27	924.166	926.998	1420.1	2020.83	175.873
823.5	459.705	307.621	710.722	901.155	1470.89	1054.98	84.7334	54.2229	176.089	1534.23	2090.72	925.659	927.605	1420.04	2020.73	178.539
824	462.579	310.873	710.228	902.633	1470.75	1056.77	84.5563	55.8422	176.841	1532.64	2092.38	926.641	928.238	1419.18	2020.19	181.851
824.5	465.064	314.423	709.762	904.678	1469.84	1058.28	84.7458	58.0408	177.108	1532.47	2094.95	927.745	929.453	1417.28	2019.55	185.751
825	467.31	317.899	709.655	906.738	1468.73	1058.89	86.8201	60.559	177.009	1534.15	2097.94	929.425	931.495	1414.54	2019.01	190.222
825.5	469.37	321.013	710.049	908.546	1468.03	1058.59	94.0698	62.9304	176.799	1537.3	2100.78	931.947	934.161	1411.66	2019.02	195.274
826	471.36	323.633	710.981	910.011	1468.26	1057.72	109.197	64.7479	176.896	1540.86	2102.99	935.128	937.094	1409.37	2019.66	200.73
826.5	473.36	326.068	712.07	911.13	1469.51	1057.01	134.602	65.8702	177.591	1543.61	2104.33	938.406	939.993	1408.1	2021	206.3
827	475.543	328.667	712.782	911.905	1471.6	1056.88	168.632	66.4663	178.791	1544.92	2104.64	941.36	942.749	1408.16	2023.13	211.663
827.5	478.153	331.898	712.72	912.348	1473.85	1057.4	204.291	66.947	180.228	1545.06	2104.1	943.786	945.028	1409.18	2025.82	216.502
828	481.289	335.664	712.005	912.5	1475.6	1058.19	232.183	67.7956	181.305	1545.08	2102.82	945.947	946.537	1410.81	2028.92	220.837
828.5	484.926	339.782	711.23	912.67	1476.36	1058.77	242.886	69.3271	181.824	1546.05	2101.22	948.32	946.948	1412.63	2031.97	224.785
829	488.756	343.764	711.264	913.214	1476.23	1059.04	234.22	71.4885	181.692	1548.47	2099.85	951.249	946.57	1414.39	2034.62	228.708
829.5	492.348	347.228	712.727	914.385	1475.84	1059.27	207.279	73.9215	181.307	1551.85	2099.26	954.9	945.805	1415.88	2036.4	232.792
830	495.272	349.891	715.808	916.003	1475.86	1059.87	171.228	76.1688	181.015	1555.07	2099.78	958.891	945.373	1417.06	2036.86	237.06
830.5	497.214	351.578	719.928	917.501	1476.76	1060.76	136.699	78.0062	181.116	1556.92	2101.09	962.455	945.731	1417.85	2036.16	241.321
831	498.189	352.641	723.932	918.104	1478.39	1061.34	112.179	79.3658	181.765	1556.96	2102.81	964.807	947.111	1418.16	2034.6	245.223
831.5	498.35	353.404	726.727	917.462	1480.2	1060.6	100.204	80.3497	182.786	1555.62	2104.24	965.435	949.095	1417.57	2033.2	248.431
832	497.753	354.276	727.642	915.795	1481.62	1058.05	97.5088	81.0602	184.056	1553.74	2105.33	964.626	950.921	1416.21	2032.46	250.856
832.5	496.832	355.538	726.975	913.847	1482.3	1054.15	99.6435	81.5866	185.245	1552.12	2106.37	963.061	951.955	1414.13	2032.88	252.554
833	495.744	357.217	725.405	912.473	1482.29	1050.3	101.547	81.8423	186.253	1551.1	2107.98	961.601	952.054	1411.81	2034.23	253.669
833.5	494.761	359.037	723.925	912.104	1481.95	1048.2	101.261	81.6983	186.88	1550.53	2110.56	960.986	951.598	1409.73	2035.86	254.361
834	493.836	360.502	723.232	912.713	1481.58	1048.87	99.1385	81.1468	187.079	1550.09	2114.18	961.525	951.052	1408.52	2037.02	254.641
834.5	493.032	361.156	723.53	913.453	1481.26	1052.18	97.0996	80.2433	186.895	1549.52	2118.41	962.816	950.899	1408.58	2037	254.359
835	492.231	360.63	724.519	913.768	1480.7	1056.57	96.5219	79.2537	186.502	1549.2	2122.37	964.2	951.231	1409.86	2035.88	253.476
835.5	491.433	359.076	725.585	913.373	1479.64	1060.24	97.8898	78.411	186.155	1549.41	2125.25	964.882	951.993	1411.92	2033.79	252.009
836	490.647	356.952	726.343	912.833	1478.14	1061.79	100.387	77.9248	186.095	1550.49	2126.64	964.728	952.827	1414.15	2031.6	250.137
836.5	490.055	354.847	726.777	912.723	1476.33	1061.17	102.994	77.8606	186.423	1552.11	2126.66	963.664	953.464	1416.08	2029.87	248.194
837	489.866	353.318	727.205	913.444	1474.78	1059.17	104.956	78.1238	187.085	1553.62	2125.62	962.086	953.754	1417.36	2029.18	246.438
837.5	490.104	352.421	727.953	914.864	1473.74	1056.97	106.045	78.5456	187.866	1554.11	2124.16	959.97	953.737	1417.89	2029.41	244.985
838	490.624	351.958	728.963	916.316	1473.51	1055.61	106.423	78.8703	188.573	1553	2122.91	957.685	953.455	1417.78	2030.39	243.684
838.5	491.052	351.484	729.895	917.148	1473.6	1055.41	106.378	78.9266	189.109	1550.85	2122.36	955.377	952.947	1417.31	2031.79	242.201
839	491.292	350.65	730.229	916.954	1473.51	1056.35	106.323	78.6363	189.432	1548.55	2122.47	953.15	952.184	1416.88	2033.49	240.3
839.5	491.263	349.371	729.859	916.054	1472.69	1057.78	106.634	78.0884	189.59	1547.27	2122.74	951.231	951.209	1416.64	2035.31	237.905
840	491.022	347.837	729.109	914.953	1471.01	1059.32	107.632	77.4864	189.623	1547.29	2122.31	949.687	949.867	1416.8	2037.09	235.154
840.5	490.56	346.47	728.658	914.159	1468.73	1060.39	109.231	76.9673	189.623	1548.39	2120.51	948.898	948.46	1417.25	2038.5	232.431
841	489.81	345.489	729.029	913.775	1466.4	1060.92	111.053	76.6175	189.619	1549.58	2117.16	948.38	947.345	1417.55	2039.22	230.087
841.5	488.851	344.91	730.161	913.666	1464.87	1060.78	112.452	76.2695	189.689	1549.73	2112.68	947.854	947.102	1417.11	2038.92	228.371
842	487.665	344.415	731.438	913.576	1464.66	1060.06	113.114	75.7437	189.799	1548.44	2108.44	946.75	947.819	1415.48	2037.74	227.156
842.5	486.638	343.727	731.901	913.356	1466.18	1058.94	113.057	74.8896	189.967	1545.9	2105.66	945.217	949.32	1412.84	2036.19	226.085
843	486.087	342.684	731.157	912.997	1468.75	1057.64	112.683	73.7366	190.115	1542.96	2105.36	943.425	950.977	1409.92	2035.34	224.71
843.5	486.378	341.226	729.345	912.558	1471.77	1056.46	112.603	72.4703	190.208	1540.1	2107.03	941.776	952.007	1407.82	2035.99	222.648
844	487.366	339.383	727.648	912.035	1474.32	1055.41	113.129	71.3241	190.236	1537.78	2109.65	940.439	951.904	1407.53	2038.42	219.905
844.5	488.5	337.206	726.997	911.312	1476.03	1054.67	114.273	70.4785	190.233	1536.1	2111.89	939.428	950.693	1409.43	2042.07	216.693
845	489.147	334.799	728.137	910.405	1476.8	1054.42	115.565	69.8849	190.385	1535.05	2112.92	938.673	949.165	1413.11	2045.67	213.572
845.5	488.899	332.34	730.563	909.599	1476.92	1055.09	116.681	69.3864	190.642	1534.62	2112.68	938.175	948.15	1417.37	2048.03	210.99
846	487.965	330.133	733.426	909.427	1476.89	1057.02	117.493	68.7462	191.043	1534.91	2111.58	938.326	948.343	1420.71	2048.3	209.281
846.5	486.693	328.473	735.656	910.351	1477.01	1060.17	118.114	67.8876	191.491	1536	2110.47	939.544	949.487	1422.12	2046.96	208.368
847	485.636	327.568	736.679	912.287	1477.07	1063.94	118.769	66.8413	192.032	1537.51	2109.74	942.022	950.912	1421.44	2045.06	207.857
847.5	484.968	327.242	736.595	914.792	1476.81	1067.21	119.576	65.7728	192.605	1538.97	2109.48	945.314	951.718	1419.38	2044.06	207.321
848	484.82	327.185	735.935	917.154	1475.93	1069.05	120.566	64.9268	193.134	1540	2109.52	948.25	951.462	1417.16	2044.6	206.388
848.5	484.856	326.818	735.477	918.729	1474.55	1069.03	121.599	64.4741	193.594	1540.87	2109.89	949.503	950.175	1415.72	2046.56	204.989
849	484.902	325.931	735.675	919.373	1473.25	1067.8	122.655	64.5491	193.871	1542.06	2110.89	948.136	948.468	1415.79	2049.12	203.22
849.5	484.875	324.658	736.737	919.349	1472.81	1066.44	123.727	65.0137	193.977	1544.12	2112.72	944.622	947.098	1417.1	2051.31	201.287
850	485.05	323.518	738.335	919.409	1473.88	1066.12	124.942	65.6305	193.915	1547.16	2115.53	940.179	946.598	1419.13	2052.71	199.477
850.5	485.587	322.982	740.175	919.828	1476.43	1067.19	126.314	66.1354	193.965	1550.74	2118.89	936.545	947.11	1421.31	2053.48	198.012
851	486.371	323.277	741.834	920.661	1480.04	1069.3	127.857	66.2243	194.301	1554.1	2122.15	934.686	948.232	1423.55	2054.52	197.096
851.5	487.243	324.233	743.189	921.703	1483.81	1071.59	129.567	65.8659	195.227	1556.45	2124.72	934.768	949.552	1426.22	2056.52	196.852
852	487.988	325.438	744.175	922.735	1486.95	1073.3	131.54	65.1264	196.547	1557.66	2126.54	936.067	950.549	1429.39	2060.13	197.467
852.5	488.516	326.512	745.098	923.739	1488.96	1074.22	133.934	64.386	198.095	1558.13	2128.06	937.502	951.359	1433.11	2064.8	198.864
853	488.747	327.256	746.312	924.709	1489.84	1074.64	136.772	63.9112	199.454	1558.54	2129.94	938.404	952.187	1436.72	2069.96	200.83
853.5	488.704	327.74	748.067	925.744	1489.99	1075	140.043	63.9079	200.522	1559.37	2132.57	938.632	953.598	1439.78	2074.69	203.048
854	488.476	328.219	750.465	926.65	1489.81	1075.63	143.424	64.3617	201.37	1560.52	2135.78	938.815	956.006	1441.83	2078.86	205.154
854.5	488.09	328.858	753.217	927.237	1489.74	1076.46	146.704	65.0995	202.105	1561.52	2138.92	939.468	959.739	1443.19	2082.8	206.986
855	487.61	329.886	756.066	927.337	1490.12	1077.38	149.525	65.9825	203.106	1561.71	2141.24	940.966	964.339	1444.6	2086.64	208.672
855.5	487.076	331.607	758.582	927.247	1491.26	1078.27	151.826	66.9233	204.482	1560.69	2142.47	942.942	969.008	1446.67	2090.72	210.557
856	486.675	334.132	760.672	927.451	1493.38	1079.43	153.654	67.9635	206.297	1558.84	2142.73	945.032	972.658	1449.64	2094.68	213.062
856.5	486.649	337.594	762.403	928.706	1496.63	1081.06	155.462	69.2034	208.259	1557.05	2143.15	947.063	974.801	1453.13	2098.71	216.494
857	487.451	341.969	764.107	931.218	1500.95	1083.44	157.722	70.6234	210.181	1556.7	2144.61	949.075	975.658	1456.82	2102.1	220.894
857.5	489.264	347.05	766.141	934.932	1505.88	1086.58	160.969	72.1507	212.027	1558.53	2148.03	951.34	976.172	1460.7	2104.85	226.291
858	492.265	352.608	768.744	939.172	1510.83	1090.29	165.336	73.7119	213.84	1562.76	2153.36	954.112	977.526	1465.36	2106.89	232.68
858.5	496.289	358.576	771.993	943.429	1515.08	1094.29	170.544	75.2186	215.855	1568.85	2160.07	957.626	980.54	1471.61	2109.04	239.996
859	500.926	365.273	775.659	947.456	1518.34	1098.28	176.15	76.7827	218.269	1575.52	2167.65	962.087	985.56	1479.78	2111.78	248.386
859.5	505.552	373.213	779.575	951.316	1520.72	1102.25	181.527	78.5729	221.417	1581.88	2175.46	967.762	992.258	1489.7	2115.74	257.952
860	509.827	383.184	783.447	955.382	1522.78	1106.14	186.547	80.8335	225.461	1587.5	2183.49	974.736	1000.44	1500.1	2121.2	268.643
860.5	513.79	395.367	787.383	960.102	1525.37	1110.09	191.503	83.5915	230.354	1593.06	2191.98	983.2	1009.86	1510.07	2128.68	280.565
861	517.931	409.92	791.695	965.67	1529.32	1113.99	197.262	86.8561	235.826	1599.37	2201.32	993.133	1020.43	1519.4	2138.18	293.833
861.5	522.979	426.43	796.893	972.212	1535.21	1118.15	204.404	90.4697	241.67	1607.3	2211.41	1003.87	1032.16	1528.6	2149.51	308.494
862	529.219	443.954	803.133	979.8	1543.13	1122.78	213.303	94.3388	247.579	1616.7	2222.01	1014.72	1044.44	1538.97	2162.12	324.737
862.5	536.552	461.66	810.486	988.221	1553.14	1128.33	223.334	98.4865	253.435	1626.63	2232.52	1025.13	1056.56	1551.27	2175.16	342.527
863	544.21	478.53	818.552	997.098	1564.73	1134.79	233.643	102.913	259.251	1635.83	2242.6	1035.15	1067.66	1565.52	2188.09	361.374
863.5	551.41	493.812	827.056	1005.65	1577.39	1142.05	243.444	107.705	265.266	1643.36	2252.18	1045.38	1077.35	1580.11	2200.46	380.779
864	557.65	506.533	836.102	1013.21	1590.69	1149.75	252.543	112.827	271.765	1649.26	2261.65	1057.06	1085.64	1593.19	2212.56	400.165
864.5	563.228	516.346	846.015	1018.78	1604.01	1157.81	261.375	118.045	278.825	1653.96	2271.7	1071	1092.48	1603.55	2224.87	419.317
865	569.004	523.331	857.084	1021.85	1617.08	1166.26	270.797	123.093	286.265	1658.3	2283.13	1087.95	1098.15	1610.96	2238.25	438.471
865.5	575.792	528.01	869.42	1022.49	1629.73	1175.41	281.265	127.697	293.778	1662.5	2296.32	1107.67	1102.8	1616.53	2253.09	458.489
866	583.943	531.577	882.423	1021.57	1642.13	1185.79	292.915	131.858	301.071	1666.54	2311.37	1129.4	1106.71	1621.89	2269.77	480.251
866.5	593.089	535.512	895.344	1020.23	1654.65	1197.69	305.569	135.728	308.044	1670.32	2328.7	1152.72	1110.64	1628.78	2288.39	505.07
867	602.578	541.482	907.651	1019.79	1667.94	1211.13	318.934	139.712	314.865	1673.92	2348.14	1177.66	1115.66	1638.28	2308.92	533.782
867.5	611.822	550.771	919.668	1021.41	1682.51	1225.93	332.903	144.25	322.106	1678.21	2369.9	1204.67	1123.05	1650.58	2331.44	566.71
868	621.125	564.156	932.267	1025.9	1699.11	1241.77	347.917	149.78	330.315	1684.31	2394.8	1235.13	1133.55	1666.12	2356.34	604.93
868.5	631.225	582.874	946.679	1033.52	1718.27	1258.5	364.412	156.594	340.086	1693.93	2422.98	1270.23	1147.31	1685.53	2383.88	648.569
869	643.162	607.386	963.589	1044.56	1740.13	1276.45	382.804	164.753	351.813	1707.71	2454.84	1310.22	1164.85	1709.88	2414.49	697.691
869.5	657.384	638.371	983.125	1059.16	1764.95	1295.9	403.754	174.56	365.573	1725.69	2491.43	1355.59	1186.4	1741.1	2448.48	753.664
870	673.815	677.988	1005.36	1077.39	1792.88	1317.35	427.005	186.258	381.682	1748.09	2532.41	1405.69	1212.96	1780.69	2485.99	816.918
870.5	691.619	726.934	1030.24	1100.01	1824.01	1341.43	452.89	200.057	400.147	1774.66	2578.09	1459.69	1246.44	1828.81	2527.91	888.474
871	710.107	786.169	1058.2	1127.51	1859.1	1368.55	482.189	216.389	420.934	1805.36	2629.01	1517.63	1287.83	1885.57	2574.7	971.215
871.5	729.204	858.001	1090.46	1159.97	1899.01	1399.18	515.255	235.507	444.278	1841.3	2684.4	1579.09	1337.58	1949.75	2626.85	1065.68
872	749.339	941.079	1127	1197.62	1944.07	1434.18	552.57	257.166	470.145	1882.81	2743.84	1643.65	1395.66	2019.82	2684.77	1171.69
872.5	771.074	1033.57	1167.23	1239.17	1994.47	1473.23	594.145	281.086	498.059	1929.59	2806.37	1710.6	1459.82	2095.09	2747.38	1287.8
873	793.946	1132.03	1209.18	1282.68	2048.25	1515.5	638.131	306.02	527.172	1980.83	2869.03	1777.44	1527.21	2173.16	2812.21	1407.26
873.5	816.309	1229	1249.49	1325.4	2101.93	1558.76	681.614	330.297	555.813	2032.71	2928.13	1840.85	1593.74	2250.69	2875.37	1521.58
874	835.504	1316.19	1284.61	1364.05	2150.2	1599.15	720.098	351.455	581.638	2080.68	2977.21	1895.18	1654.11	2321.25	2932.01	1618.34
874.5	848.13	1380.94	1310.57	1395.48	2187.84	1632.34	749.656	367.003	601.55	2117.76	3012.23	1935.51	1702.04	2377.31	2977.25	1687.88
875	852.506	1416.66	1325.74	1415.17	2211.32	1653.06	766.449	375.299	612.786	2139.48	3027.97	1957.85	1730.8	2411.63	3005.61	1722.42
875.5	848.266	1418.31	1328.57	1421.06	2216.81	1659.63	767.977	374.318	614.473	2143.15	3020.23	1956.43	1737.08	2415.32	3014.5	1714.97
876	836.368	1381.26	1318.67	1412.34	2205.77	1651.65	755.991	364.808	606.051	2125.75	2992.78	1932.64	1719.32	2388.92	3003.98	1670.53
876.5	819.63	1314.74	1298.75	1387.94	2181.41	1630.63	732.59	348.609	589.623	2092.65	2947.92	1888.47	1679.47	2336.94	2974.68	1595.18
877	800.528	1227.69	1271.33	1352.38	2146.88	1601.81	701.729	327.592	568.491	2048.78	2891.13	1826.33	1624.7	2265.7	2931.76	1497.56
877.5	781.495	1131.38	1240.14	1310.48	2107.97	1569.8	668.404	304.868	545.675	1999.83	2829.63	1754.23	1562.29	2187.62	2881.45	1390.96
878	764.107	1038.69	1209.34	1268.05	2069.1	1539.06	636.561	282.677	523.952	1952.48	2768.41	1678.19	1500.65	2112.24	2830.64	1286.01
878.5	749.586	958.485	1182.46	1230.36	2034.54	1512.58	609.829	262.988	505.01	1911.01	2711.64	1604.52	1446.36	2048.09	2786.04	1192.26
879	738.913	897.951	1162.3	1200.53	2006.89	1492.17	590.182	246.795	490.293	1879.28	2661.26	1537.54	1404.3	1997.9	2752.36	1114.65
879.5	732.607	856.235	1150.01	1180.92	1987.75	1479.2	579.893	234.657	480.413	1857.23	2619.28	1480.11	1376.24	1961.89	2733.09	1056.86
880	730.952	831.362	1147.19	1169.73	1979.58	1473.93	579.915	227.767	476.229	1844.52	2586.65	1434.31	1360.53	1939.85	2728.13	1020.64
880.5	734.154	819.52	1154.55	1165.01	1982.12	1477.27	589.89	225.924	479.189	1840.36	2562.54	1398.69	1355	1927.54	2736.7	1003.41
881	741.9	814.304	1171.56	1164.63	1995.7	1490.5	610.518	228.878	489.768	1841.58	2547.26	1372.59	1355.01	1921.99	2758.54	1004.16
881.5	754.002	811.3	1198.94	1165.81	2022.28	1513.53	641.077	236.323	507.846	1845.67	2539.47	1356.23	1356.23	1920.59	2793.01	1021.4
882	770.622	807.093	1236.42	1166.55	2061.28	1547.05	680.555	246.2	533.358	1849.98	2537.1	1347.96	1355.21	1920.77	2840.56	1051.74
882.5	791.922	799.561	1282.77	1165.17	2112.89	1591.17	729.56	256.707	565.11	1852.73	2539.35	1348.36	1350.31	1920.78	2903.24	1094.07
883	818.027	787.643	1338.11	1160.88	2178.21	1644.8	787.407	265.74	602.148	1852.76	2545.36	1358.56	1341.24	1919.52	2980.55	1146.85
883.5	848.918	770.688	1400.67	1153.53	2254.5	1706.9	852.897	272.492	644.165	1849.6	2554.7	1377.78	1327.93	1916.72	3071.2	1207.52
884	883.538	749.328	1467.78	1143.25	2338.64	1775.36	924.379	276.869	690	1844.05	2567.95	1406.07	1311.07	1912.46	3171.18	1273.74
884.5	919.62	724.057	1535.75	1131.15	2425.64	1846.36	997.036	279.395	737.914	1836.92	2584.83	1442.06	1291.26	1907.06	3273.33	1341.29
885	953.626	696.15	1598.45	1117.88	2507.6	1914.22	1064.88	281.133	784.358	1828.92	2604.15	1481.95	1269.03	1901.05	3368.82	1404.14
885.5	980.912	667.349	1649.61	1103.94	2576.02	1971.58	1118.6	282.515	824.247	1820.52	2624.06	1521.75	1245.76	1894.61	3446.82	1453.25
886	997.303	639.007	1680.06	1089.69	2619.51	2010.61	1151.33	283.08	851.47	1811.5	2641.5	1556.04	1223.21	1887.51	3497.85	1479.92
886.5	999.807	612.048	1684.81	1075.6	2632.54	2023.25	1158.59	281.771	859.692	1801.38	2653.92	1580.81	1203.38	1879.14	3512.89	1478.55
887	987.577	586.479	1662.75	1062.27	2611.17	2005.48	1134.63	276.975	847.005	1789.18	2657.65	1591.69	1187.33	1868.42	3485.47	1442.41
887.5	963.1	562.086	1612.51	1050.41	2553.81	1958.37	1084.09	267.56	813.323	1774.76	2651.9	1586.23	1175	1854.13	3418.37	1372.75
888	930.171	538.607	1541.27	1040.61	2469.9	1885.62	1013.05	254.036	762.504	1758.56	2636.89	1566.1	1166.01	1835.59	3316.79	1277.12
888.5	892.969	516.124	1457.68	1033.21	2368.24	1796.8	927.753	237.332	702.106	1741.08	2612.53	1532.25	1158.93	1813.47	3191.86	1162.38
889	855.585	495.288	1369.96	1027.87	2259.41	1702.35	838.391	219.246	639.077	1723.77	2581.76	1488.18	1153.02	1788.7	3058.77	1040.05
889.5	820.505	476.786	1286.33	1024.11	2153.34	1611.67	751.974	201.626	579.749	1707.85	2547.07	1438.56	1148.03	1763.21	2930.51	919.432
890	789.305	460.872	1211.46	1021.48	2056.5	1530.84	674.844	185.751	527.274	1694.28	2510.69	1386.56	1144.2	1738.81	2816.98	808.261
890.5	762.463	447.659	1148.61	1019.55	1973.01	1462.08	608.972	172.265	483.057	1683.18	2475.11	1335.25	1141.54	1716.77	2721.75	709.955
891	740.067	436.454	1096.91	1018.2	1902.91	1406.17	554.375	160.959	446.425	1674.16	2442.04	1286.23	1140.05	1697.92	2645.47	624.853
891.5	721.976	426.552	1054.47	1017.26	1846.46	1360.64	511.063	151.767	415.693	1666.52	2413.34	1240.75	1139.26	1682.36	2585.19	554.103
892	707.386	417.65	1020.02	1016.47	1802.77	1323.6	475.621	144.341	390.223	1659.49	2389.11	1199.2	1138.77	1670.4	2536.75	494.686
892.5	695.346	409.604	991.16	1015.67	1769.36	1294.05	446.06	138.301	369.327	1652.49	2369.06	1161.6	1138.47	1661.69	2497.86	444.435
893	685.061	402.583	966.723	1014.76	1744.54	1270.53	421.431	133.476	352.36	1645.37	2352.87	1128.57	1138.58	1656.16	2467.03	402.579
893.5	675.959	396.919	946.29	1013.88	1725.81	1252.07	400.187	129.526	338.937	1639.07	2339	1100.25	1139.72	1653.15	2443.06	367.321
894	667.794	392.446	929.022	1013.24	1710.45	1237.98	382.052	126.141	328.383	1634.34	2326.81	1076.39	1142.64	1651.53	2425.64	337.553
894.5	660.648	388.794	914.429	1013.2	1697.28	1226.83	366.96	123.18	319.657	1631.95	2316.23	1057.3	1147.65	1650.45	2413.89	313.283
895	654.389	385.413	902.31	1013.89	1685.67	1217.81	354.184	120.549	312.206	1631.98	2307.31	1042.13	1154.44	1649.25	2406.63	293.591
895.5	648.512	381.838	892.139	1015.48	1675.67	1210.67	343.046	118.241	305.664	1633.88	2300.31	1029.99	1162.47	1647.93	2403.23	277.601
896	642.671	377.995	883.726	1017.74	1667.58	1205.09	332.957	116.357	299.917	1636.52	2295.11	1020.45	1170.41	1647.06	2402.65	264.617
896.5	636.511	374.378	877.045	1020.44	1661.19	1201.03	323.441	114.834	295.04	1638.79	2290.73	1012.54	1177.35	1647.47	2403.92	253.477
897	630.515	371.582	871.846	1023.07	1655.79	1198.13	314.388	113.64	290.748	1640.22	2286.41	1005.87	1182.51	1649.65	2406	243.43
897.5	625.205	370.131	867.861	1025.23	1650.71	1195.89	306.004	112.804	286.812	1641.04	2281.91	1000.2	1186.12	1653.18	2407.63	234.416
898	621.272	370.266	864.508	1026.54	1645.43	1193.66	298.36	112.374	283.073	1641.87	2277.64	995.355	1188.95	1657.54	2407.76	226.645
898.5	618.818	371.284	861.069	1026.79	1640.15	1191.05	291.679	112.319	279.605	1643	2274.43	991.229	1192.07	1661.83	2405.76	220.554
899	617.579	372.35	857.094	1026.36	1635.6	1187.75	286.209	112.534	276.655	1644.38	2273.13	987.895	1196.44	1665.68	2402.03	216.441
899.5	617.262	372.564	852.634	1025.82	1632.53	1183.85	281.875	112.752	274.59	1645.57	2273.33	985.323	1202.27	1668.77	2397.42	213.769
900	617.204	371.794	848.227	1026.06	1631.35	1179.62	278.832	112.701	273.659	1646.14	2274.31	983.626	1209.2	1671.11	2393.02	211.809
900.5	617.207	370.362	844.683	1027.26	1632.15	1175.47	276.899	112.26	273.639	1646.11	2274.96	982.954	1216.09	1672.65	2389.46	209.808
901	617.111	369.11	842.688	1029.3	1634.45	1171.96	275.719	111.594	274.155	1645.99	2274.98	983.157	1221.76	1673.21	2386.78	207.402
901.5	617.146	368.634	842.205	1031.55	1637.48	1169.59	274.805	111.115	274.68	1646.67	2274.76	983.963	1225.21	1672.8	2384.52	204.739
902	617.436	369.255	842.844	1033.47	1640.31	1168.61	273.766	111.246	274.897	1648.65	2275.21	984.979	1226.31	1671.34	2382.08	202.305
902.5	618.208	370.74	843.841	1034.78	1642.2	1168.76	272.469	112.152	274.701	1652.07	2276.72	985.638	1225.58	1669.8	2379.32	200.538
903	619.545	372.519	844.459	1035.53	1642.61	1169.53	270.954	113.562	274.153	1656.2	2278.92	985.602	1224.09	1668.77	2376.44	199.513
903.5	621.324	373.989	844.282	1036.2	1641.25	1170.23	269.422	115.028	273.408	1660.23	2280.67	984.611	1223.04	1668.82	2373.93	198.882
904	623.237	374.812	843.221	1037.15	1638.45	1170.48	268.003	115.975	272.538	1663.29	2280.94	982.932	1222.98	1669.28	2372.07	198.136
904.5	624.918	375.083	841.661	1038.63	1635.09	1170.27	266.824	116.247	271.496	1665.2	2279.34	980.72	1223.75	1669.21	2370.96	196.916
905	626.25	375.078	840.034	1040.41	1632.32	1170.03	266.063	115.933	270.222	1665.84	2276.7	978.655	1224.48	1667.46	2370.34	195.228
905.5	627.525	374.969	838.837	1042.33	1630.99	1170.29	265.944	115.506	268.925	1665.37	2274.39	977.015	1224.2	1663.58	2369.86	193.282
906	629.089	374.82	838.37	1044.13	1631.34	1171.23	266.77	115.315	267.926	1664.05	2273.72	976.133	1222.71	1658.15	2369.45	191.276
906.5	631.373	374.454	838.753	1045.67	1633.14	1172.52	268.557	115.546	267.697	1662.3	2274.77	975.769	1220.61	1652.48	2369.13	189.202
907	634.258	373.698	839.742	1046.78	1635.45	1173.59	270.982	116.1	268.427	1660.6	2276.94	975.484	1219.12	1648.22	2369.17	186.861
907.5	637.349	372.667	840.845	1047.34	1637.47	1173.93	273.549	116.785	270.002	1659.34	2279.27	974.76	1219.18	1646.17	2369.68	184.009
908	639.88	371.582	841.727	1047.38	1638.74	1173.46	275.666	117.45	272.01	1659.1	2281.17	972.963	1220.83	1646.31	2370.5	180.615
908.5	641.362	370.844	842.141	1047.32	1639.43	1172.46	277.115	118.051	273.864	1660.22	2282.51	970.4	1223.34	1647.52	2371.42	176.972
909	641.774	370.506	842.348	1047.82	1640.05	1171.57	277.957	118.595	275.195	1662.6	2283.53	967.706	1225.06	1648.58	2372.16	173.48
909.5	641.658	370.456	842.574	1049.33	1640.97	1171.34	278.554	119.13	275.789	1665.57	2284.74	966.2	1225.12	1648.5	2372.85	170.484
910	641.728	370.222	843.14	1051.92	1642.14	1172.07	279.205	119.569	275.91	1668.25	2286.24	966.365	1223.22	1647.52	2373.55	168.013
910.5	642.54	369.482	843.939	1055.06	1643.12	1173.49	280.085	119.965	275.957	1669.88	2288.04	968.217	1220.62	1646.27	2374.46	165.945
911	644.19	368.268	844.763	1058	1643.59	1175.16	281.326	120.353	276.237	1670.28	2290.01	970.667	1218.56	1646.11	2375.39	164.006
911.5	646.405	367.054	845.562	1059.92	1643.56	1176.52	283.058	120.899	277.088	1669.85	2292.25	972.456	1218.05	1647.81	2376.07	162.058
912	648.624	366.391	846.31	1060.62	1643.67	1177.39	285.576	121.659	278.428	1669.55	2295	972.713	1219.08	1651.97	2376	160.132
912.5	650.341	366.583	847.215	1060.53	1644.7	1177.78	288.892	122.61	280.175	1670.31	2298.19	971.415	1220.88	1657.96	2374.98	158.422
913	651.474	367.376	848.36	1060.57	1647.14	1178.2	292.795	123.632	281.917	1672.66	2301.7	969.746	1222.69	1664.49	2373.24	157.023
913.5	652.451	368.195	849.59	1061.33	1650.64	1179.1	296.849	124.482	283.356	1676.24	2305.03	968.907	1224.02	1669.65	2371.34	156.029
914	653.977	368.563	850.582	1062.85	1654.48	1181.05	300.456	125.078	284.402	1680.46	2307.74	969.745	1225.12	1672.13	2370.25	155.188
914.5	656.58	368.408	851.046	1064.81	1657.71	1184.02	303.391	125.457	284.954	1684.25	2309.54	971.667	1226.55	1671.59	2370.75	154.398
915	660.477	368.117	851.206	1066.8	1660.26	1187.72	305.761	125.848	285.386	1687.1	2310.37	973.615	1228.6	1669.14	2373.45	153.558
915.5	665.26	368.135	851.493	1068.85	1662.56	1191.42	308.26	126.346	286.015	1688.76	2310.72	974.47	1231.34	1666.56	2378.33	152.806
916	670.391	368.785	852.458	1071.24	1665.54	1194.5	311.497	127.011	287.265	1689.79	2311.31	973.833	1234.56	1665.46	2385	152.265
916.5	675.297	369.984	854.387	1074.55	1669.72	1196.36	316.099	127.834	289.115	1690.79	2313.03	972.015	1237.94	1666.97	2392.51	152.168
917	680.019	371.613	857.244	1078.97	1675.06	1196.89	321.904	128.891	291.42	1692.46	2316.35	970.07	1241.58	1670.94	2399.62	152.623
917.5	684.75	373.478	860.58	1084.46	1680.94	1196.59	328.658	130.289	293.966	1695.1	2321.39	969.018	1245.95	1676.78	2405.67	153.647
918	689.665	375.665	863.882	1090.51	1686.68	1196.35	335.875	132.206	296.601	1698.8	2327.98	969.533	1251.68	1683.39	2410.68	155.252
918.5	694.898	378.389	866.887	1096.61	1692.35	1197.29	343.157	134.683	299.419	1703.4	2334.93	971.522	1259.02	1690.59	2415.75	157.27
919	700.25	381.63	869.514	1102.6	1698.56	1200.57	350.336	137.53	302.647	1708.44	2341.24	974.567	1268.06	1698.23	2422.44	159.524
919.5	705.737	385.138	872.021	1108.59	1706.24	1206.44	357.631	140.529	306.432	1713.45	2346.23	978.363	1278.21	1706.69	2431.93	161.851
920	711.43	388.449	874.807	1114.79	1715.6	1214.71	365.469	143.49	310.809	1718.15	2350.35	982.482	1288.83	1715.6	2444.46	164.16
920.5	717.574	391.224	878.197	1121.11	1726.12	1224.42	374.291	146.502	315.612	1722.64	2354.59	986.738	1299.41	1724.74	2458.99	166.549
921	724.14	393.322	882.343	1127.46	1737.18	1234.55	384.474	149.879	320.594	1727.44	2360.38	991.062	1309.87	1734.03	2474.18	169.31
921.5	730.775	394.867	887.194	1133.64	1748.34	1244.33	395.86	153.935	325.692	1733.42	2368.34	995.615	1320.72	1743.99	2488.69	172.756
922	737.036	396.307	892.516	1139.95	1759.96	1253.49	408.345	158.733	330.964	1741.09	2378.71	1000.65	1332.79	1755.42	2502.67	177.124
922.5	742.96	398.222	898.141	1146.88	1773.34	1262.43	421.855	164.145	336.66	1750.45	2391.14	1006.28	1346.9	1769.44	2517.39	182.469
923	749.137	401.281	904.096	1155.18	1789.67	1271.69	436.434	169.853	343.063	1761.22	2404.94	1012.42	1363.68	1786.28	2534.99	188.482
923.5	756.617	405.737	910.626	1165.56	1809.42	1281.93	452.347	175.607	350.338	1772.32	2420.07	1018.87	1383.34	1805.4	2557.17	194.812
924	765.888	411.505	918.218	1178.01	1832.46	1293.09	469.935	181.456	358.462	1783.31	2436.77	1025.36	1405.23	1825.8	2583.94	201.377
924.5	776.909	418.279	927.019	1191.95	1857.71	1305.18	489.104	187.598	367.429	1794.1	2454.79	1031.72	1428.51	1846.47	2613.74	208.435
925	788.565	425.293	936.724	1206.74	1884.2	1318.34	509.795	194.329	377.201	1805.72	2473.66	1038.11	1452.3	1866.99	2644.82	216.637
925.5	800.037	432.215	946.812	1221.48	1911.61	1332.73	531.727	201.914	387.73	1818.95	2492.3	1045.27	1476.06	1887.75	2675.67	226.681
926	811.289	439.092	956.93	1236.16	1940.04	1348.94	554.582	210.218	399.174	1834.65	2510.27	1053.91	1500.25	1909.56	2706.52	238.602
926.5	822.995	446.307	966.988	1251.46	1969.97	1367.48	578.346	219.068	411.402	1852.54	2528.15	1064.57	1525.97	1933.44	2738.9	252.116
927	836.179	454.094	977.059	1268.53	2002.2	1388.49	602.953	228.327	424.204	1872.16	2547.93	1077.64	1554.65	1960.8	2774.62	266.299
927.5	851.408	462.399	987.122	1288.34	2036.88	1411.6	628.293	238.101	437.207	1893.25	2571.44	1092.57	1587.96	1992.08	2814.97	280.03
928	868.279	470.854	996.755	1312.02	2074.05	1436.15	654.294	248.502	450.079	1915.39	2600.05	1108.94	1627.04	2027.87	2860.08	292.289
928.5	885.69	479.254	1005.32	1339.27	2113.97	1461.36	681.031	259.923	462.584	1939.12	2633.17	1126.2	1672.12	2069.17	2908.9	302.598
929	902.617	487.948	1012.14	1369.95	2156.78	1486.83	708.791	272.339	474.831	1965.38	2668.37	1143.79	1723.96	2116.39	2960.22	311.002
929.5	918.038	497.508	1017.26	1404.61	2202.81	1512.62	738.055	285.622	487.09	1994.55	2704.07	1161.62	1782.68	2170.08	3013.96	317.456
930	931.911	508.568	1020.61	1443.78	2253.32	1538.91	769.191	299.601	499.6	2026.87	2740.08	1179.64	1848.65	2232.12	3071.04	322.088
930.5	944.579	521.128	1022.77	1488.68	2309.32	1566.44	802.268	314.222	512.483	2062.71	2778.5	1198.39	1923.88	2302.75	3133.53	325.145
931	957.151	534.486	1023.82	1541	2371.63	1595.89	837.655	329.809	525.723	2101.71	2823.23	1218.69	2009.4	2382.96	3203.8	326.839
931.5	970.909	548.016	1023.66	1600.52	2441.79	1627.95	875.611	347.254	539.501	2144.4	2876.63	1241.52	2105.57	2474.2	3282.3	327.784
932	987.458	561.654	1022.59	1666.08	2519.12	1663.42	916.538	367.242	554.458	2191.46	2938.37	1267.15	2213.72	2575.45	3369.45	328.836
932.5	1007.57	575.988	1021.54	1736.04	2602.92	1702.81	961.398	390.133	571.297	2242.97	3007.22	1295.78	2332.18	2685.67	3464.62	330.901
933	1031.11	591.665	1021.94	1807.81	2692.64	1746.23	1010.04	415.826	590.646	2298.94	3079.82	1327.23	2459	2803.53	3567.08	334.731
933.5	1057.2	608.842	1024.78	1880.2	2786.83	1793.66	1062.05	443.22	612.741	2358.77	3154.08	1360.82	2592.99	2926.57	3677	340.426
934	1084.16	626.626	1030.17	1953.26	2885.08	1844.56	1117.36	471.447	636.816	2421.47	3230.4	1396.71	2731.97	3052.99	3795.02	348.136
934.5	1111.68	644.08	1037.69	2028.09	2987.83	1898.33	1175.91	500.149	662.18	2486.61	3310.09	1435.68	2874.74	3182.28	3921.22	357.698
935	1140.57	660.812	1046.26	2106.31	3095.63	1955.14	1238.23	529.636	688.423	2554.58	3394.78	1478.44	3021.91	3314.62	4055.93	369.127
935.5	1172.61	677.506	1055.27	2189.64	3209.44	2015.21	1306.19	561.062	715.979	2625.87	3486.11	1526.13	3174.88	3452.38	4199.25	383.238
936	1209.36	695.722	1065.01	2278.93	3331.38	2079.4	1380.54	596.013	745.971	2702.17	3583.26	1579.25	3336.41	3599.71	4351.42	400.81
936.5	1251.8	717.021	1076.29	2375.3	3462.9	2149.21	1462.01	635.406	779.966	2784.62	3685.7	1637.09	3512.41	3760.46	4514.99	422.373
937	1299.59	742.004	1090	2480.39	3606.99	2225.44	1552.8	680.167	818.598	2873.95	3794.83	1699.41	3707.05	3939.21	4694.04	448.977
937.5	1352.79	771.414	1107.26	2595.39	3767.77	2308.76	1653.6	730.861	862.677	2971.7	3912.13	1766.39	3924.25	4140.48	4892.37	480.296
938	1411.9	805.488	1128.41	2722.55	3946.72	2400.29	1766.19	787.308	912.404	3078.87	4040.05	1838.22	4170.33	4365.39	5115.43	515.794
938.5	1477.13	844.617	1153.46	2863.87	4145.85	2500.04	1894.14	849.98	967.778	3196.21	4182.96	1916.46	4446.01	4615.7	5366.89	555.847
939	1549.46	890.593	1182.75	3019.92	4366.84	2608.62	2037.4	919.588	1029.72	3325.56	4340.51	2003.01	4752.23	4893.86	5648.25	600.568
939.5	1629.46	944.319	1215.55	3192.21	4609.66	2729.01	2196.01	996.61	1099.47	3467.46	4512.78	2098.29	5094.83	5200.81	5964.97	650.794
940	1717.83	1006.19	1251.69	3382.86	4878.06	2863.35	2373.32	1083.44	1177.46	3621.5	4701.29	2203.47	5477.28	5544.1	6323.15	708.863
940.5	1816.61	1077.73	1291.63	3594.76	5179.65	3015.83	2571.09	1182.65	1265.4	3790.12	4904.53	2318.66	5908.04	5935.32	6731.04	775.389
941	1927.69	1157.91	1336.06	3837.24	5522.27	3194.52	2795.8	1295.95	1365.7	3974.27	5124.38	2442.69	6405.96	6385.64	7204.79	849.718
941.5	2051.17	1245.19	1386.08	4121.16	5921.22	3403.88	3060.59	1426.48	1480.1	4176.44	5367.59	2575.16	6982.07	6915.22	7756.72	929.848
942	2185.17	1337.13	1442.78	4456.19	6390.64	3649.63	3371.06	1574.64	1612.75	4404.41	5636.27	2714	7649.32	7536.9	8392.89	1010.03
942.5	2324	1428.66	1504.68	4855.38	6936.76	3940.57	3731.18	1738.39	1766.71	4662.72	5936.85	2857.47	8419.02	8249.25	9119.52	1084.02
943	2461.65	1515.14	1569.97	5320.19	7568	4274.01	4144.56	1916.56	1940.63	4956.56	6281.3	3005.25	9275.38	9047.48	9923.59	1143.84
943.5	2593.78	1591.07	1636.68	5841.76	8278.11	4647.12	4600.1	2105.57	2133.22	5297.92	6671.28	3156.06	10195.7	9904.01	10780.4	1185.28
944	2720.57	1656.52	1704.11	6406.79	9045.42	5054.48	5087.05	2301.18	2338.56	5689.89	7116.19	3314.42	11145	10779.7	11658.1	1206.8
944.5	2845.38	1713.55	1773.49	6988.42	9844.12	5478.66	5590.97	2499.33	2548.57	6137.18	7630.65	3486.6	12076.4	11628.7	12514.1	1208.64
945	2972.97	1764.61	1847.09	7559.12	10635	5903.18	6092.35	2693.98	2755.85	6653.74	8211.98	3677.55	12947.1	12408.8	13311.4	1197.07
945.5	3107.31	1814.61	1925.63	8087.75	11380.6	6306.56	6572.26	2879.63	2953.11	7237.37	8867.11	3894.74	13716.4	13091.8	14011.1	1178.43
946	3250.5	1866.48	2008.95	8552.14	12038.9	6671.79	7010.14	3049	3135.57	7887.54	9601.67	4144.23	14367.7	13647.7	14592.7	1159.3
946.5	3404.79	1923.61	2095.4	8937.23	12582.6	6982.09	7394.44	3197.99	3296.68	8608.35	10398.6	4423.95	14884.3	14072.1	15046.5	1144.93
947	3568.76	1987.53	2183.44	9219.67	12998	7218.04	7712.28	3324.7	3431.61	9381.97	11248.1	4730.52	15254.6	14366.2	15359.5	1137.98
947.5	3739.88	2059.14	2272.58	9396.77	13259.3	7375.26	7952.34	3424.07	3537.57	10192.2	12129.5	5057.55	15482.6	14512.7	15533.6	1138.96
948	3913.91	2138.53	2362.42	9465.64	13366.4	7445.24	8113.18	3494.7	3607.59	11017.3	13011.1	5392.54	15553.1	14514.5	15567.5	1145.04
948.5	4085.18	2221.69	2451.75	9410.21	13321.6	7417.8	8185.57	3535.06	3639.69	11825.8	13858.4	5722.06	15452.6	14370.7	15447.1	1152.92
949	4250.19	2305.19	2538.09	9241.95	13108.7	7301.55	8165.08	3538.83	3635.28	12585.4	14627.3	6028.66	15185	14062.2	15172.9	1159.08
949.5	4408.37	2386	2619.32	8970.28	12745.5	7099.95	8062.08	3508.32	3593.64	13248.5	15287.9	6298.57	14742.6	13607.9	14748.6	1161.28
950	4562.65	2464.01	2695.28	8597.25	12252.7	6820.85	7885.12	3448.23	3522.3	13786.6	15792.1	6513.92	14140.4	13028.1	14179.1	1158.49
950.5	4715.89	2540.11	2767.38	8153.11	11646.1	6486.7	7655.62	3362.65	3430.31	14167.7	16103.9	6657.4	13416.5	12341	13499.3	1150.8
951	4869.34	2615	2839.01	7662.18	10971.1	6116.2	7400.55	3262.17	3326	14349.2	16224.3	6727.11	12605.5	11594.1	12746.1	1139.3
951.5	5023.76	2688.59	2913.09	7150.1	10268.1	5731.09	7144.8	3156.12	3219.92	14341.5	16130.4	6714.75	11759.7	10827.5	11964	1124.18
952	5183.72	2761.12	2992.97	6647.78	9578.17	5353.22	6914.94	3053.85	3121.29	14149.4	15838.5	6620.99	10928.1	10084.7	11200.2	1105.09
952.5	5363.1	2836.23	3082.68	6178.94	8937.1	5001.27	6733.63	2965.12	3041.33	13782.6	15395	6461.87	10157.9	9400.6	10494.6	1081.54
953	5578.85	2921.99	3188.23	5770.72	8369.36	4691.09	6631.49	2899.34	2989.39	13296	14829.5	6247.61	9483.21	8801.92	9881.74	1052.27
953.5	5849.61	3029.76	3322.95	5432.51	7903.7	4431.1	6631.66	2870.43	2975.71	12731.6	14200.2	5996.2	8920.76	8320.67	9377	1016.65
954	6199.62	3172.3	3499.43	5171.75	7543.05	4230.12	6748.68	2885	3013.97	12136.9	13562.5	5730.17	8493.99	7959.49	8992.86	975.482
954.5	6641.61	3358.05	3728.58	4998.55	7287.79	4091.01	7013.61	2949.62	3110.4	11563.1	12969.4	5468.85	8200.06	7720.58	8733.85	929.368
955	7202.58	3600.61	4034.5	4901.91	7145.5	4009.78	7441.14	3077.35	3272.88	11052.1	12462.9	5231.95	8027.47	7609.7	8588.36	879.822
955.5	7945.26	3923.05	4437.28	4874.56	7099.66	3984.83	8048.84	3273.45	3515.95	10645.9	12066.5	5031.87	7978.12	7605.77	8549.42	828.417
956	8922.94	4352.78	4961.3	4911.74	7137.75	4008.29	8898.52	3552.49	3848.21	10360.7	11815.7	4882.45	8030.07	7692.88	8606.82	776.094
956.5	10215	4938.96	5667.19	4997.32	7252.13	4070.39	10028.2	3941.91	4289.25	10215.9	11710.6	4790.27	8163.09	7859.05	8741.32	723.59
957	11944.8	5737.22	6601.22	5121.37	7421.08	4163.69	11481.2	4456.07	4871.94	10220.7	11741.5	4753.12	8368.07	8081.38	8940.82	671.414
957.5	14185.2	6791.92	7812.6	5276.89	7627.87	4278.35	13369.8	5121.38	5617.02	10356.1	11916.8	4773.34	8624.41	8346.96	9192.02	620.383
958	17067.1	8184.08	9413.2	5453.76	7860.25	4405.98	15742.3	5978.29	6561.08	10614.5	12210.5	4845.86	8918.7	8648.64	9480.56	571.372
958.5	20787.2	9985.38	11459.8	5644.82	8104.23	4540.8	18647.3	7042.87	7742.89	10979.7	12602	4961.17	9246.04	8976.93	9798.67	525.395
959	25404.3	12230.5	13986	5842.92	8352.77	4677.81	22188.6	8343.44	9158.46	11425.5	13084.1	5114.63	9597.7	9327.33	10139.6	483.875
959.5	30897.3	14950.5	17025.8	6039.8	8601.32	4813.87	26254.5	9885.39	10790.1	11936.9	13628.2	5296.8	9967.62	9695.03	10496.2	447.488
960	37000.1	18014.1	20392.7	6228.84	8846.82	4946.34	30632.2	11592	12554.2	12488.5	14210.2	5495.91	10350.8	10071.8	10862.9	415.768
960.5	43061.2	21145.4	23781.1	6404.57	9086.14	5073.19	34911.4	13332	14291.9	13047.3	14799.9	5699.77	10737.7	10449.2	11231.6	388.534
961	48177.9	23905.2	26692.8	6565.95	9315.46	5192.77	38519.2	14885.9	15786.2	13570.5	15356.4	5893.08	11120.9	10819	11594.4	364.464
961.5	51353.9	25813.9	28640.7	6713.82	9533.31	5303.18	40941.1	16032.5	16784.3	14011.2	15840.3	6060.02	11493.8	11177.3	11945.1	342.428
962	52014.2	26527.9	29251.7	6852.15	9741.41	5406.19	41556.2	16540.9	17143.1	14337.2	16197	6182.61	11856.3	11524.3	12283.5	322.094
962.5	49887.6	25730.5	28211.2	6987.96	9946.87	5505.8	40385.8	16283	16754.5	14513.4	16414.4	6252.22	12214.4	11867.3	12616.8	303.011
963	45320.7	23648.5	25815.2	7131.24	10162.3	5610.3	37664.9	15358	15665.5	14548.1	16491.9	6269.08	12581.9	12220.3	12960.3	285.252
963.5	39237.2	20689.4	22506	7295.88	10405.3	5730.38	33759.5	13905.7	14122.3	14475.5	16438.7	6239.26	12979.7	12604.7	13336	269.072
964	32606.9	17316.4	18819.3	7496.98	10698	5877.83	29430.5	12191.1	12363.6	14335.5	16315.4	6182.84	13432.3	13047.7	13768.4	254.236
964.5	26346	14052.3	15309.1	7755.37	11059.5	6070.65	25232	10475	10651.6	14185.3	16173	6120.97	13977	13572.8	14289.6	240.666
965	20997.1	11199.9	12301.1	8088.79	11515.4	6317.45	21631.3	8956.97	9155.05	14068.2	16066.8	6074.15	14637.4	14211	14925.7	228.373
965.5	16818.6	8959.91	9965.28	8506.7	12087.3	6627.59	18770	7740.16	7970.7	14020.8	16028.6	6055.31	15435.5	14983.9	15691.7	217.316
966	13704.9	7259.17	8196.09	9022.09	12780.9	7013.17	16640.5	6821.1	7106.72	14052.5	16075.8	6069.65	16394.5	15893.3	16603.8	207.402
966.5	11396.6	5988.17	6881.59	9631.53	13603.5	7465.8	15191.2	6185.28	6492.75	14161.1	16220.8	6119.36	17498.2	16940.3	17648	198.647
967	9701.45	5067.31	5912.92	10320.1	14537	7975.6	14218.3	5763.97	6084.69	14349.6	16442.9	6197.51	18723.1	18095.9	18791.3	190.717
967.5	8419.62	4368.07	5167.54	11069.3	15540.8	8525.18	13598.1	5492.48	5829.23	14603	16732.7	6299.82	20025.7	19306.6	19988	183.42
968	7426.83	3829.5	4598.25	11837.6	16560.5	9079.39	13239.9	5337.84	5673.64	14910.5	17081.4	6423.83	21328.3	20497.4	21163	176.734
968.5	6669.54	3424.11	4171.52	12574	17518	9599.5	13030.3	5256.22	5587.86	15266.4	17465.1	6564.72	22535.4	21568.7	22232.7	170.732
969	6081.35	3107.82	3839.78	13202.1	18332.5	10029.7	12889.1	5210.84	5534.24	15648.5	17865.4	6717.88	23519.7	22419.6	23084.7	165.605
969.5	5612.79	2856.14	3576.39	13650.6	18892.9	10327.9	12734.4	5168.91	5476.13	16034.5	18251.4	6874.56	24174.3	22908.8	23614.5	161.526
970	5235.14	2655.17	3359.37	13859.7	19117.9	10448.2	12496.9	5097.38	5380.73	16388.8	18590	7021.2	24375.8	22949.9	23734.5	158.279
970.5	4916.15	2486.66	3173.26	13747.1	18962.3	10340.9	12122.1	4975.19	5225.01	16675.1	18837.2	7140.29	24022	22502.4	23347.4	155.476
971	4637.73	2342.08	3014.69	13313.3	18361.6	10013.6	11572.8	4780.92	5001.54	16853.4	18935.1	7208.94	23123.8	21511.5	22448.9	152.677
971.5	4388.37	2214.87	2877.77	12585.6	17361.3	9476.17	10858	4514.33	4703.8	16859.7	18859	7213.54	21698.8	20064.5	21089.4	149.604
972	4151.59	2095.38	2751.48	11593.1	16044.6	8758.62	9992.22	4184.65	4343.15	16672.1	18558.6	7136.15	19846.7	18282.6	19347.4	146.347
972.5	3914.64	1977.25	2625.56	10444.1	14496.7	7934.54	9017.29	3800.71	3939.22	16265.9	17996.9	6961.42	17744.2	16293.7	17387.6	143.289
973	3667.37	1856.45	2492.66	9231.61	12861.8	7066.99	7994.58	3387.6	3512.44	15604.7	17198.9	6696.17	15552.3	14274.3	15366.5	140.791
973.5	3407.4	1732.34	2352.57	8048.67	11254.2	6220.32	6980.6	2968.86	3089.12	14727.7	16164.3	6340.26	13436.3	12353.3	13430.1	139.113
974	3137.91	1605.84	2208.72	6962	9777.76	5440.71	6028.24	2568.47	2690.12	13667.3	14935.8	5904.43	11506.9	10648.9	11682.1	138.138
974.5	2866.08	1478.27	2066.26	6007.04	8482.84	4758.7	5167.64	2203.72	2333.62	12464.3	13594.2	5416.27	9847.72	9192.79	10178.9	137.448
975	2601.19	1351.58	1928.04	5214.13	7382.72	4188.01	4424.13	1882.88	2024.82	11200.5	12206.5	4897.83	8476.57	7984.76	8945.4	136.498
975.5	2351.65	1228.49	1796.59	4561.53	6491.31	3718.2	3800.5	1614.4	1762.79	9939.93	10852.7	4378.98	7359.97	7027.25	7949.11	134.96
976	2126.76	1113.45	1674.19	4030.95	5769.01	3340.18	3283.18	1391.7	1547.23	8750.17	9588.97	3883.87	6478.41	6262.17	7157.43	132.865
976.5	1929.34	1009.76	1563.3	3612.7	5183.29	3038.9	2866.84	1208.05	1370.19	7669.58	8470.35	3434.25	5779.89	5650.57	6532.72	130.505
977	1760.37	920.039	1468.32	3277.26	4718.04	2795.12	2532.31	1060.59	1225.77	6725.7	7517.51	3044.07	5215.83	5172.32	6027.77	128.373
977.5	1620.15	844.824	1389.33	3007.27	4338.77	2597.73	2259.54	939.931	1110.07	5940.22	6715.23	2712.62	4765.3	4785.7	5615.35	126.821
978	1502.38	781.525	1323.65	2791.93	4026.14	2436.01	2037.64	841.035	1015.75	5288.23	6066.74	2442.27	4396.82	4468.07	5276.52	126.018
978.5	1403.42	728.357	1269.42	2613.52	3771.24	2300.99	1852.93	761.37	937.963	4757.87	5543.96	2226.39	4088.82	4206.75	4994.36	125.723
979	1321.56	684.449	1223.38	2462.77	3558.45	2188.45	1696.33	695.704	873.463	4335.92	5117.42	2052.88	3833.22	3984.33	4762.13	125.539
979.5	1253.03	648.433	1183.95	2335.22	3377.96	2094	1565.55	640.793	818.892	3994.34	4777.55	1915.3	3616.58	3792.84	4572.01	125.188
980	1195.39	619.942	1151.37	2225.18	3225.63	2013.72	1455.01	594.665	772.475	3720.06	4501.48	1804.46	3429.98	3629.46	4412.96	124.574
980.5	1146.52	597.383	1124.41	2130.68	3094.02	1945.71	1360.5	554.785	733.32	3501.3	4272.9	1712.16	3270.95	3488.94	4277.5	123.869
981	1103.12	578.481	1101.54	2050.74	2979.47	1887.49	1279.88	520.085	699.729	3322.05	4086.9	1635.31	3133.74	3368.41	4158.85	123.215
981.5	1063.83	561.86	1081.75	1982.06	2880.76	1837.21	1209.11	490.204	670.807	3174.51	3932.58	1571.37	3014.33	3265.68	4052.11	122.798
982	1028.73	546.731	1064.25	1922.12	2794.23	1793.8	1145.65	464.251	645.737	3051.27	3802.92	1518.17	2911.49	3175.65	3956.04	122.502
982.5	997.916	533.014	1049.18	1869.28	2718.09	1755.66	1088.91	441.703	623.549	2945.01	3695.75	1475.32	2820.44	3094.88	3869.96	122.233
983	972.05	520.653	1036.98	1821.89	2650.9	1721.4	1037.58	421.91	603.497	2853.01	3604.39	1440.61	2738.01	3020.83	3792.29	121.849
983.5	951.154	509.338	1026.75	1779.59	2590.78	1690.77	991.178	403.992	584.646	2773.1	3524.46	1411.28	2662.74	2951.16	3721.28	121.439
984	933.995	498.515	1017.19	1742.37	2536.7	1663.05	950.181	387.618	566.242	2703.1	3454.13	1385.24	2592.82	2885.03	3654.68	121.165
984.5	919.049	488.119	1006.92	1709.21	2488.51	1638.25	913.835	372.731	548.35	2643.09	3390.84	1360.77	2527.67	2822.6	3591	121.097
985	904.819	478.341	995.776	1679.4	2445.46	1616.62	881.634	359.272	531.816	2591.83	3334.12	1337.61	2467.54	2763.9	3530.58	121.169
985.5	890.125	469.543	984.817	1652.03	2407.18	1597.67	853.092	347.305	517.635	2547.81	3284.71	1316.54	2411.84	2709.66	3474.48	121.151
986	874.53	462.055	976.33	1626.55	2373.12	1580.71	826.892	336.61	506.481	2510.06	3241.16	1298.22	2359.5	2660.39	3423.7	120.892
986.5	858.441	455.721	972.016	1602.95	2342.33	1565.05	802.074	326.79	498.057	2476.88	3201.78	1282.59	2309.92	2615.53	3379.07	120.345
987	842.946	450.33	972.998	1581.58	2314.21	1550.27	778.401	317.584	490.911	2446.7	3165.07	1269.2	2262.22	2574.4	3339.76	119.673
987.5	829.341	445.784	979.085	1562.6	2288.28	1536.53	755.965	308.872	483.748	2418.61	3129.56	1257.08	2216.81	2536.04	3304.04	119.132
988	818.174	441.831	987.727	1545.93	2263.9	1524.5	735.108	300.608	475.727	2392.05	3095.51	1245.76	2174.56	2499.62	3270.05	118.885
988.5	809.155	438.02	995.965	1531.08	2241.09	1514.25	716.299	292.791	467.103	2366.79	3064.97	1235.58	2136.01	2464.96	3236.35	118.892
989	801.149	433.621	1000.33	1517.29	2219.82	1505.56	699.008	285.302	458.651	2342.97	3039.22	1226.83	2101.07	2432.39	3202.56	118.908
989.5	793.355	428.084	999.288	1504.13	2200.2	1497.68	683.181	277.966	451.184	2320.67	3019.09	1219.65	2069.55	2402.51	3169.26	118.656
990	785.421	421.556	992.17	1491.25	2182.64	1489.75	668.918	270.746	445.019	2299.85	3004.11	1213.27	2040.59	2376.19	3137.91	117.988
990.5	778.08	414.867	980.81	1478.72	2167.39	1481.25	656.496	263.824	440.014	2280.77	2991.57	1206.56	2013.99	2353.64	3109.65	116.98
991	771.967	409.395	967.994	1467.03	2154.34	1472.25	645.951	257.485	435.903	2263.22	2979.11	1198.86	1990.47	2334.36	3085.78	115.867
991.5	767.195	405.813	955.882	1456.84	2143.22	1463.29	637.015	252.16	432.121	2247.28	2964.81	1190.4	1970.26	2317.78	3066.14	114.865
992	763.098	404.18	945.466	1448.49	2133.65	1455.07	628.73	247.93	428.598	2233.46	2948.44	1182.55	1953.8	2303.11	3050.17	114.08
992.5	758.435	403.359	936.402	1442.2	2125.3	1448.39	620.202	244.704	425.172	2221.53	2930.74	1176.47	1940.62	2289.79	3037.9	113.542
993	752.558	402.388	928.395	1437.39	2118.7	1443.55	611.384	242.382	422.105	2211.48	2913.23	1173.17	1929.9	2278.17	3029.29	113.272
993.5	745.694	400.735	921.228	1433.63	2114.04	1440.78	603.052	240.664	419.668	2203.25	2897.56	1171.7	1921.3	2268.94	3024.9	113.345
994	738.907	398.484	915.415	1431.05	2111.51	1440.18	596.791	239.317	418.207	2196.63	2885.03	1170.87	1915.15	2262.98	3024.66	113.774
994.5	733.377	396.026	911.397	1430.28	2111.03	1441.42	593.877	238.294	417.672	2191.3	2876.53	1169.33	1912.03	2261.44	3027.44	114.567
995	730.068	393.474	909.148	1432.28	2112.47	1444.16	594.39	237.732	417.956	2187.33	2871.34	1166.89	1912.74	2264.29	3031.67	115.475
995.5	728.825	390.898	907.923	1437.94	2115.67	1447.99	597.714	237.859	418.784	2184.52	2869.13	1164.37	1917.85	2270.91	3036.38	116.272
996	728.931	388.321	907.249	1446.97	2121.35	1452.64	602.705	239.074	420.073	2183.16	2869.4	1162.81	1926.53	2280.83	3041.87	116.655
996.5	729.282	386.076	906.81	1458.05	2129.76	1458.17	608.167	241.457	422.039	2183.86	2871.91	1162.84	1938.36	2292.82	3049.72	116.652
997	729.116	384.557	906.738	1469.69	2141.15	1464.68	613.523	244.77	424.834	2186.79	2877.27	1164.26	1952.45	2306.29	3062.04	116.45
997.5	728.112	384.014	907.292	1480.46	2155.35	1471.95	618.737	248.558	428.441	2192.07	2886.09	1166.54	1968.28	2321.34	3079.45	116.461
998	726.657	384.519	908.235	1490.15	2171.28	1479.52	624.09	252.031	432.416	2199.58	2897.66	1169.02	1985.58	2337.97	3100.73	116.938
998.5	725.633	385.746	909.209	1499.3	2187.62	1486.94	629.93	254.723	436.107	2208.82	2910.73	1171.85	2004.01	2356.19	3123.29	117.919
999	725.985	387.505	909.83	1508.57	2203.19	1493.82	636.381	256.403	438.958	2219.15	2923.11	1175.41	2023.03	2375.63	3144.16	119.134
999.5	728.419	389.697	910.215	1518.13	2217.38	1500.33	643.308	257.521	441.029	2230.33	2933.14	1180.19	2042.07	2395.27	3161.41	120.139
1000	732.523	392.05	910.591	1527.3	2230.08	1506.89	650.363	258.595	442.856	2241.73	2940.12	1186.2	2060.53	2413.94	3174.95	120.624
1000.5	737.373	394.242	911.292	1535.34	2241.44	1514.03	657.098	260.204	445.096	2253.36	2945.2	1192.87	2078.08	2430.43	3186.21	120.419
1001	741.661	395.719	912.252	1541.94	2251.94	1521.78	663.306	262.563	448.084	2265.09	2950.42	1199.18	2094.22	2444.54	3197.05	119.792
1001.5	744.482	396.238	913.438	1547.69	2262.15	1529.77	668.948	265.682	451.631	2276.65	2957.59	1204.29	2108.82	2456.52	3208.38	119.024
1002	745.414	395.781	914.808	1553.69	2272.52	1537.37	674.449	269.38	455.258	2287.82	2967.09	1207.94	2121.82	2466.84	3220.5	118.527
1002.5	744.61	394.881	916.56	1560.93	2283.3	1544.19	680.162	273.285	458.431	2298.31	2977.92	1210.54	2133.27	2476.46	3232.62	118.448
1003	742.718	394.197	918.574	1569.58	2294.44	1550.26	686.497	277.066	460.975	2308.02	2988.6	1212.73	2143.75	2485.83	3244.15	118.885
1003.5	740.534	394.128	920.529	1578.88	2305.55	1555.99	693.48	280.393	463.017	2316.64	2998.17	1215.17	2154.17	2495.28	3254.63	119.83
1004	738.6	394.604	921.945	1587.68	2316.42	1561.98	701.153	283.08	464.913	2324.08	3006.8	1218.33	2165.57	2504.88	3264.81	121.244
1004.5	737.475	395.322	922.62	1595.42	2326.94	1568.45	709.792	285.085	466.954	2330.7	3015.57	1222.36	2178.76	2514.89	3275.89	123.204
1005	737.419	396.083	922.931	1602.49	2337.64	1575.35	719.461	286.584	469.413	2337.21	3025.59	1227.06	2193.82	2525.69	3289.27	125.694
1005.5	738.618	396.968	923.864	1610.06	2349.43	1582.43	730.164	288.013	472.585	2344.24	3037.08	1232.02	2210.62	2537.6	3305.69	128.591
1006	740.979	398.201	926.277	1619.31	2363.23	1589.68	741.769	289.831	476.684	2352.24	3049.34	1236.8	2228.18	2550.85	3325.02	131.789
1006.5	744.398	399.897	930.574	1630.56	2379.8	1597.4	753.787	292.396	481.919	2361.09	3061.12	1241.29	2245.93	2565.67	3345.98	135.069
1007	749.019	401.878	935.899	1643.44	2398.81	1606.03	765.937	295.777	488.143	2370.35	3071.78	1245.53	2263.83	2582.04	3367.25	138.414
1007.5	754.656	403.749	941.346	1657.26	2419.77	1615.97	778.243	299.876	494.988	2379.68	3081.5	1249.95	2281.98	2600.16	3387.9	141.983
1008	761.286	405.291	946.11	1671.53	2442.03	1627.22	791.222	304.62	502.064	2389	3091.57	1254.93	2300.99	2620.14	3408.28	145.937
1008.5	768.371	406.455	950.275	1686.15	2464.9	1639.61	805.183	309.901	509.251	2399.08	3103.06	1260.76	2321.35	2641.76	3429.44	150.29
1009	775.236	407.535	953.947	1701.31	2487.93	1652.47	820.211	315.816	516.626	2410.35	3116.81	1267.47	2343.35	2664.57	3452.23	154.777
1009.5	781.2	408.898	957.262	1716.8	2510.85	1665.49	835.793	322.344	524.393	2423.4	3132.3	1274.63	2366.72	2688.19	3476.54	158.837
1010	786.243	410.888	960.116	1732.11	2533.13	1678.58	851.3	329.308	532.596	2437.5	3148.94	1281.77	2391.36	2712.03	3501.67	161.903
1010.5	790.907	413.647	962.251	1746.53	2554.56	1691.58	866.239	336.384	540.882	2451.75	3166.41	1288.38	2417.16	2736.07	3527.12	163.464
1011	796.135	417.131	963.742	1759.75	2574.65	1704.16	880.641	343.159	548.694	2465.44	3184.67	1294.35	2443.97	2760.23	3552.73	163.698
1011.5	802.467	421.03	964.887	1772.14	2593.43	1715.53	894.731	349.375	555.413	2478.79	3203.96	1299.84	2471.73	2784.77	3578.87	163.071
1012	809.858	424.824	966.411	1784.64	2610.65	1725.36	908.785	354.903	560.941	2492.8	3224.26	1305.59	2499.44	2809.22	3605.5	162.118
1012.5	817.831	428.078	968.621	1798.1	2626.54	1733.52	922.666	360.001	565.422	2508.71	3244.87	1312.61	2526.22	2833.03	3631.74	161.319
1013	825.942	430.603	971.469	1812.61	2641.39	1740.31	936.274	365.01	569.355	2526.91	3265.12	1321.9	2550.45	2855.06	3655.81	160.777
1013.5	834.169	432.756	974.799	1827.26	2655.04	1746.32	949.518	370.284	573.255	2546.7	3284.65	1334.08	2571.14	2874.53	3675.84	160.457
1014	842.816	435.386	978.678	1840.54	2667.32	1751.93	962.547	375.929	577.432	2566.6	3304.33	1348.48	2587.36	2890.6	3690.93	160.313
1014.5	852.415	439.349	983.529	1850.68	2677.6	1757	975.622	381.865	581.905	2585.3	3325.35	1363.56	2598.31	2902.92	3700.78	160.505
1015	863.104	445.13	989.762	1856.71	2685.02	1761.11	988.626	387.867	586.464	2602.17	3348.73	1377.35	2604.33	2910.58	3706.01	161.465
1015.5	874.834	452.613	997.624	1858.51	2688.39	1763.65	1001.15	393.56	590.823	2617.5	3373.34	1388.46	2605.33	2912.85	3707.14	163.495
1016	887.197	460.915	1006.56	1856.09	2687.21	1764.04	1012.29	398.575	594.702	2631.84	3396.82	1396.62	2601.16	2909.58	3703.34	166.701
1016.5	900.162	469.007	1015.8	1850.17	2680.72	1762.71	1021.24	402.361	598.043	2645.62	3415.57	1402.75	2592.5	2900.02	3694.24	170.87
1017	914.191	476.15	1024.67	1841.44	2669.5	1759.8	1027.92	404.59	600.745	2658.25	3427.9	1408.53	2579.84	2885.19	3679.79	175.391
1017.5	929.825	482.242	1032.99	1830.46	2654.76	1755.27	1032.76	405.263	603.093	2668.75	3433.4	1414.83	2563.95	2866.49	3661.09	179.805
1018	947.128	487.855	1041.15	1818.06	2637.71	1748.81	1036.59	404.612	605.345	2675.9	3433.2	1421.67	2545.68	2845.47	3640.06	183.749
1018.5	965.985	493.9	1049.99	1804.85	2619.98	1740.44	1040.21	403.621	607.972	2677.93	3429.84	1427.7	2525.07	2823.15	3618.62	187.289
1019	985.712	501.256	1060.32	1790.91	2602.56	1730.45	1044.21	403.344	611.296	2674.8	3423.76	1431.34	2501.7	2800.04	3597.7	190.704
1019.5	1006.31	510.507	1073.22	1776.15	2585.85	1720.1	1049.29	404.862	615.519	2666.19	3413.77	1431.1	2475.45	2775.74	3577.39	194.416
1020	1028.94	522.231	1089.26	1760.27	2569.43	1710.54	1056.46	408.468	620.835	2651.92	3398.76	1427.29	2446.5	2750.09	3557.34	198.649
1020.5	1055.46	536.529	1108.68	1742.92	2552.55	1702.55	1067.48	413.901	627.334	2633.15	3377.47	1420.29	2416.02	2722.93	3537.44	203.467
1021	1087.93	553.765	1132.11	1724.84	2534.28	1695.89	1084.51	420.918	635.419	2611.18	3350.67	1410.41	2385.63	2694.65	3517.99	208.694
1021.5	1129.07	574.781	1159.91	1706.92	2514.31	1689.64	1108.88	429.13	646.168	2587.43	3321.46	1398.46	2356.73	2665.87	3499.06	214.115
1022	1179.9	600.095	1192.25	1690.35	2493.06	1682.98	1142.64	438.894	660.555	2563.88	3292.75	1384.65	2329.82	2637.59	3480.26	219.64
1022.5	1241.79	630.923	1230.88	1675.46	2471.75	1675.77	1186.83	451.512	679.64	2542.09	3266.89	1369.78	2304.52	2611.07	3461.25	225.367
1023	1318.51	669.111	1277.59	1661.94	2452	1668.87	1241.93	468.332	704.55	2523.27	3244.09	1354.98	2280.5	2587.4	3442.27	231.676
1023.5	1412.65	715.978	1334.18	1649.01	2435.5	1663.62	1310.41	490.523	735.343	2508.04	3223.88	1341.65	2257.43	2567.51	3425.05	239.183
1024	1527.73	773.469	1404.36	1635.81	2424.12	1661.03	1394.04	519.836	772.08	2496.35	3205.29	1330.61	2235.81	2552.35	3411.77	248.447
1024.5	1668.17	843.401	1489.02	1622.24	2418.62	1661.77	1493.27	555.969	814.986	2488.15	3187.9	1321.89	2216.72	2542.03	3404.81	259.764
1025	1830.86	924.945	1586.94	1609.03	2419.14	1665.83	1608.87	598.443	863.582	2482.33	3172.48	1315.16	2201.42	2535.89	3405.75	273.748
1025.5	2009.14	1016.08	1696.58	1597.51	2426.32	1673.25	1736.41	646.236	917.273	2478.25	3159.87	1309.78	2190.19	2533.14	3414.39	290.762
1026	2191.05	1111.48	1811.1	1588.72	2439.41	1684.74	1868.44	696.32	974.398	2475.45	3150.13	1305.2	2183.2	2531.51	3430.58	311.194
1026.5	2360.3	1203.01	1922.74	1583.69	2458.16	1701.19	1994.64	745.233	1031.62	2473.42	3142.94	1301.44	2179.31	2529.46	3454.06	336.201
1027	2501.13	1281.06	2020.92	1581.98	2482.82	1723.06	2103.88	788.172	1084.58	2471.92	3136.69	1298.8	2177.34	2525.81	3484.14	366.069
1027.5	2596.15	1336.75	2097.32	1583.06	2512.09	1750.32	2188.4	821.28	1128.26	2470.49	3130.07	1297.13	2176.78	2520.82	3520.32	400.29
1028	2641.15	1366.09	2146.81	1586.41	2544.98	1781.2	2239.65	841.276	1159.79	2468.31	3122.14	1296.14	2177.12	2515.88	3561.15	437.963
1028.5	2635.39	1367.1	2164.17	1591.06	2579.93	1813.22	2259.05	846.044	1177.5	2464.64	3112.92	1295.18	2178.74	2513.34	3603.62	476.594
1029	2583.26	1344.3	2154.47	1596.6	2614.69	1843.73	2251.53	837.95	1181.84	2459.09	3102.98	1293.69	2182.49	2514.96	3644.25	513.697
1029.5	2501.89	1306.23	2125.21	1602.49	2647.4	1870.65	2222.08	819.948	1176.47	2452.28	3092.85	1291.35	2188.61	2520.95	3680.14	546.641
1030	2405.98	1260.93	2084.46	1608.51	2676.37	1893.17	2180.92	796.421	1164.57	2445.45	3082.99	1288.19	2196.65	2530.23	3710.25	574.839
1030.5	2309.96	1216.9	2042.67	1614.32	2701.6	1911.36	2135.34	772.184	1150.03	2439.8	3073.48	1284.43	2205.53	2540.06	3735.22	599.135
1031	2224.21	1179.58	2006.69	1619.85	2723.39	1926.76	2091.46	750.385	1136.07	2435.91	3064.36	1280.16	2214.08	2548.56	3757.31	621.508
1031.5	2154.6	1152.83	1981.02	1624.99	2742.84	1941.21	2053.91	732.767	1125.16	2433.7	3055.87	1275.58	2221.45	2554.89	3779.36	645.064
1032	2103.35	1137.76	1965.28	1630.06	2761.43	1955.83	2025.12	719.332	1119.05	2432.85	3048.4	1271.21	2227.79	2560.19	3803.06	671.776
1032.5	2068.14	1134.43	1957.74	1635.49	2779.61	1970.99	2007.48	710.213	1117.75	2433.18	3042.84	1267.84	2234.56	2566.65	3828.29	702.558
1033	2047.26	1144.4	1956.33	1642.11	2796.44	1985.51	1998.91	705.377	1120.5	2435.85	3039.48	1266.45	2243.5	2576.48	3852.51	735.229
1033.5	2039.23	1166.88	1957.72	1650.71	2809.29	1996.5	1996.65	704.743	1125.05	2442.15	3038.41	1267.36	2256.54	2590.76	3871.01	766.026
1034	2042.14	1201.07	1959.64	1662.11	2813.88	2000.57	1997.09	708.624	1128.37	2452.51	3039.52	1270.66	2273.86	2609.47	3877.96	789.245
1034.5	2056.22	1246.93	1960.28	1676.19	2805.31	1994.45	1996.85	716.814	1127.82	2466.52	3041.79	1275	2294.67	2631.35	3869.42	800.649
1035	2081.96	1301.07	1958.79	1692.06	2781.09	1974.68	1994.85	728.255	1122.11	2481.66	3044.48	1279	2317.15	2654.26	3842.16	797.815
1035.5	2118.81	1359.98	1955.83	1707.48	2739.57	1942.12	1992.87	742.105	1112.39	2494.91	3046.98	1281.15	2338.32	2675.39	3797.38	778.96
1036	2168.25	1419.17	1953.71	1719.47	2684.01	1898.76	1995.17	757.601	1101.03	2503.5	3049.2	1281.11	2355.13	2691.66	3739.5	747.469
1036.5	2230.93	1474.45	1955.91	1725.13	2620.93	1848.17	2006.03	774.496	1091.68	2506.51	3051.23	1279.21	2364.09	2700.29	3673.01	706.69
1037	2306.64	1522.5	1966.58	1722.46	2556.72	1795.96	2030	793.269	1087	2504.54	3053.2	1276.47	2363.65	2698.66	3604.41	659.792
1037.5	2395.98	1560.29	1989.39	1711.55	2497.45	1746.72	2066.95	814.213	1089.02	2497.65	3054.89	1273.89	2353.37	2686.48	3538.69	610.581
1038	2497.55	1589.5	2024.1	1692.62	2445.62	1704.13	2115.49	837.135	1098.11	2487.01	3055.86	1271.95	2334.12	2666.13	3480.66	561.528
1038.5	2608.69	1612.74	2069.37	1667.96	2402.44	1669.04	2173.26	861.623	1112.81	2473.23	3055.29	1270.85	2309.68	2640.85	3433.6	515.01
1039	2725.61	1633.84	2121.91	1640.06	2365.81	1640.82	2235.45	886.685	1131.93	2456.57	3053.12	1270.57	2283.98	2615.66	3398.86	473.057
1039.5	2842.14	1656.7	2176.74	1611.01	2333.84	1618.14	2298.12	911.529	1153.66	2438.67	3049.25	1271.29	2261.02	2594.57	3377.11	437.592
1040	2952.02	1683.01	2229.65	1583.02	2305.41	1598.93	2356.58	935.512	1176.1	2421.27	3043.91	1273.56	2243.33	2581.35	3365.97	410.404
1040.5	3047.88	1712.35	2276.71	1557.46	2279.64	1581.95	2407.21	957.862	1197.28	2405.9	3037.38	1277.68	2232.32	2577.2	3362.24	391.023
1041	3126	1740.97	2315.73	1535.56	2255.76	1566.73	2446.73	977.769	1214.65	2392.53	3029.58	1283.67	2229.1	2583.22	3364.71	378.812
1041.5	3185.57	1765.22	2344.11	1517.14	2233.27	1552.61	2473.32	993.587	1226.62	2379.97	3019.92	1291	2234.46	2602.89	3373.57	372.529
1042	3227.08	1781.88	2361.83	1501.35	2211.58	1539.5	2489.04	1004.73	1231.83	2366.59	3008.68	1298.84	2250.9	2639.2	3391.79	370.077
1042.5	3257.3	1792.26	2372.25	1487.22	2190.98	1527.06	2497.87	1011.68	1232.31	2351.33	2996.16	1306.51	2282.04	2695.69	3424.29	370.676
1043	3285.29	1800.36	2380.66	1473.55	2172.7	1515	2506.86	1016.33	1231.79	2334.72	2983.75	1314.29	2329.39	2777.76	3474.59	374.365
1043.5	3324.51	1813.89	2396.03	1460.03	2157.76	1503.31	2524.91	1022.86	1236.11	2318.65	2972.89	1322.82	2394.14	2882.83	3542.99	381.145
1044	3388.74	1840.76	2426.42	1447.15	2146.47	1492.53	2561.79	1035.62	1250.59	2305.13	2965.39	1333.12	2473.18	3003.92	3626.44	391.542
1044.5	3488.62	1887.59	2480.71	1435.53	2138.71	1483.2	2625.51	1059.78	1278.51	2295.62	2963.19	1346.49	2558.25	3127.83	3715.33	405.771
1045	3631.94	1958.74	2559.95	1425.6	2133.27	1476.15	2716.14	1096.54	1320.8	2291.11	2966.83	1363.34	2637.69	3234.67	3797.18	423.393
1045.5	3806.36	2048.03	2656.85	1417.54	2129.3	1471.84	2828.72	1143.96	1372.23	2291.08	2977.53	1383.99	2696.97	3306.34	3857.15	444.223
1046	3988.41	2144.83	2758.25	1411.07	2127.18	1470.39	2946.62	1197.58	1424.94	2294.89	2995.03	1408.67	2725.34	3321.6	3883.35	467.775
1046.5	4139.81	2231.39	2843.2	1406.15	2126.91	1471.54	3047.73	1248.22	1468.27	2301.8	3017.35	1436.62	2713.03	3280.09	3868.74	493.183
1047	4225.01	2289.68	2893.7	1403.49	2129.05	1474.63	3105.89	1287.05	1493.36	2309.93	3042.1	1467.46	2660.65	3187.91	3812.66	519.7
1047.5	4219.33	2304.05	2889.6	1403.67	2133.48	1478.67	3103.01	1303.54	1493.96	2317.24	3066	1500.18	2578.31	3056.9	3725.93	546.332
1048	4106.52	2265.59	2828.42	1406.89	2139.4	1482.53	3036.84	1294.5	1467.09	2321.08	3086.35	1533.48	2478.24	2912.19	3622.68	572.029
1048.5	3909.86	2181.92	2720.3	1412.87	2145.65	1485.42	2910.61	1260.36	1418.02	2320.16	3101.48	1566.24	2376.84	2772.69	3518.34	595.464
1049	3661.59	2065.58	2579.03	1419.81	2151.37	1487.05	2746.88	1204.61	1354.03	2314.29	3112.09	1597.11	2286.03	2655.06	3424.95	615.569
1049.5	3401.62	1936.44	2430.38	1426.41	2156.27	1487.54	2571.6	1138.42	1284.81	2305.05	3120.81	1625.53	2214.32	2564.89	3348.35	631.386
1050	3168.65	1814.85	2294.89	1432.07	2160.02	1487.4	2409.76	1071.69	1219.47	2295.15	3130.48	1651.37	2162.18	2501.7	3288.96	641.118
1050.5	2984.71	1715.57	2189.67	1437.42	2162.3	1486.97	2277.91	1013.78	1164.53	2286.94	3143.07	1673.96	2125.67	2462.51	3242.65	643.858
1051	2862.32	1645.16	2118.26	1443.42	2162.84	1486.27	2180.84	969.238	1123.38	2281.67	3158.57	1693.7	2101.37	2438.78	3206.48	639.39
1051.5	2789.57	1600.38	2075.67	1450.61	2161.66	1484.87	2119.98	938.898	1094.63	2278.92	3175.69	1709.47	2084.96	2424.81	3178.73	626.854
1052	2750.23	1573.81	2053.88	1458.28	2159.06	1482.47	2084.05	920.023	1075.63	2278.11	3191.43	1718.79	2073.29	2416.02	3158.3	607.002
1052.5	2723.68	1553.88	2038.32	1465	2155.77	1479	2060.8	906.599	1061.65	2278.23	3203.13	1720	2064.71	2408.82	3144.5	581.505
1053	2688.93	1530.45	2018.43	1469.38	2152.22	1475.06	2037.77	893.473	1047.81	2278.72	3207.42	1709.75	2057.34	2401.47	3135.87	551.145
1053.5	2631.65	1495.04	1985.47	1471.11	2148.45	1471.29	2003.92	875.871	1030.04	2278.77	3203.09	1686.76	2049.77	2393.14	3129.77	516.929
1054	2543.38	1443.64	1936.93	1471.03	2144.53	1468.19	1953.11	851.289	1005.5	2277.48	3190.22	1652.5	2041.17	2383.53	3123.93	480.267
1054.5	2427.09	1376.49	1873.57	1470.22	2140.37	1465.84	1880.74	818.367	973.675	2273.88	3168.36	1608.63	2031.13	2372.98	3117.33	442.117
1055	2289.53	1295.17	1797.73	1469.41	2136.16	1463.96	1790.54	777.571	935.2	2267.09	3140	1559.7	2020.24	2361.5	3110.07	403.864
1055.5	2140.11	1205.49	1715.65	1468.37	2131.87	1462.32	1688.31	731.401	892.006	2257.11	3107.48	1509.94	2009.01	2349.61	3102.84	367
1056	1989.25	1113.47	1632.46	1466.41	2127.58	1460.45	1580.65	682.514	847.337	2244.9	3072.95	1462.67	1998.31	2337.66	3095.97	333.196
1056.5	1845.29	1025.13	1552.88	1463.47	2122.62	1458.17	1475.62	634.043	803.838	2231.29	3038.82	1420.02	1988.24	2326.43	3089.28	303.28
1057	1714.31	944.998	1479.71	1459.95	2116.77	1455.39	1378.33	588.394	763.764	2217.39	3006.42	1382.21	1979.21	2316.26	3082.38	277.332
1057.5	1599.36	875.348	1414.69	1456.96	2109.85	1452.3	1293.38	547.383	727.78	2203.73	2976.95	1349.55	1971.08	2307.36	3074.82	255.467
1058	1502.56	818.677	1359.28	1455.31	2102.94	1449.19	1220.91	511.682	696.206	2190.76	2950.32	1321.1	1964.41	2299.46	3067.03	236.79
1058.5	1424.44	773.592	1312.86	1454.99	2097.11	1446.4	1160.05	480.973	669.241	2178.63	2926.49	1295.91	1959.6	2291.97	3059.81	220.622
1059	1362.91	738.506	1275.55	1455.07	2093.33	1444.54	1110.7	455.354	646.283	2167.57	2905.74	1273.56	1957.09	2284.79	3054.07	206.811
1059.5	1316.48	712.561	1247.6	1454.46	2091.29	1443.86	1070.15	434.623	627.724	2158.04	2887.66	1253.55	1956.29	2278.44	3050	195.091
1060	1281.95	692.873	1227.24	1452.9	2089.74	1444.25	1036.9	418.241	613.347	2150.1	2872.1	1235.73	1956.54	2273.84	3047.14	185.329
1060.5	1255.75	677.507	1213.02	1450.9	2087.65	1444.9	1010.16	406.164	602.497	2143.59	2859.07	1220.66	1956.84	2271.67	3044.74	177.565
1061	1234.96	665.096	1202.6	1449.21	2084.48	1445.02	987.7	397.248	594.346	2138.21	2847.78	1208.59	1956.64	2271.8	3041.91	171.391
1061.5	1216.35	653.841	1192.84	1448.25	2080.94	1444.09	967.951	389.982	587.208	2133.44	2837.65	1199.41	1955.85	2273.14	3038.57	166.442
1062	1197.15	642.582	1181.47	1447.69	2077.82	1442.2	949.188	383.015	579.714	2128.88	2828.39	1192.9	1954.63	2274.12	3034.92	162.448
1062.5	1175.4	630.402	1167.45	1446.9	2075.75	1440.06	929.954	375.177	570.901	2124.32	2819.8	1187.76	1953.5	2273.69	3031.83	159.043
1063	1150.45	616.742	1151.64	1445.4	2074.38	1438.52	909.538	366.117	560.971	2119.63	2812.31	1183.23	1952.55	2271.64	3029.97	156.112
1063.5	1122.99	601.691	1135.58	1443.18	2073.17	1438.19	888.149	355.918	550.628	2114.9	2806.46	1178.9	1951.55	2268.84	3029.71	153.584
1064	1094.51	585.861	1121.13	1440.73	2071.61	1439.09	866.943	345.456	541.001	2110.46	2802.25	1174.71	1950.1	2266.15	3030.85	151.426
1064.5	1066.9	570.629	1108.99	1438.6	2070.01	1440.84	847.187	335.523	532.908	2106.9	2799.44	1170.83	1948.22	2264.22	3033.02	149.659
1065	1041.55	557.195	1099.21	1437.21	2069.16	1442.9	830.237	326.939	526.607	2104.67	2797.68	1167.36	1946.56	2263.17	3035.88	148.44
[truncated: 5,270 more rows]
